# Supplementary material for: Non-Invasive Positive airway Pressure thErapy to Reduce Postoperative Lung complications following Upper abdominal Surgery (NIPPER PLUS): protocol for a single-centre, pilot, randomised controlled trial
Source: PubMed Central journal article supplement — BMJ Open. 2019 Jan 9;9(1):e023139. doi: 10.1136/bmjopen-2018-023139 (PMC6340066; doi:10.1136/bmjopen-2018-023139), 2019-01-09
Supplement: bmjopen-2018-023139.draft_revisions.pdf [file bmjopen-2018-023139.draft_revisions.pdf]

# BMJ Open

BMJ Open is committed to open peer review. As part of this commitment we make the peer review history of every article we publish publicly available.

When an article is published we post the peer reviewers' comments and the authors' responses online. We also post the versions of the paper that were used during peer review. These are the versions that the peer review comments apply to.

The versions of the paper that follow are the versions that were submitted during the peer review process. They are not the versions of record or the final published versions. They should not be cited or distributed as the published version of this manuscript.

BMJ Open is an open access journal and the full, final, typeset and author-corrected version of record of the manuscript is available on our site with no access controls, subscription charges or pay-per-view fees (<http://bmjopen.bmj.com>).

If you have any questions on BMJ Open's open peer review process please email [info.bmjopen@bmj.com](mailto:info.bmjopen@bmj.com)

# BMJ Open

## Non-Invasive Positive airway Pressure thErapy to Reduce Postoperative Lung complications following Upper abdominal Surgery (NIPPER PLUS): Protocol for a single centre pilot randomised control trial

|                               |                                                                                                                                                                                                                                                                                                                                                                                                                                                                                                                                                                                                                                                                           |
|-------------------------------|---------------------------------------------------------------------------------------------------------------------------------------------------------------------------------------------------------------------------------------------------------------------------------------------------------------------------------------------------------------------------------------------------------------------------------------------------------------------------------------------------------------------------------------------------------------------------------------------------------------------------------------------------------------------------|
| Journal:                      | <i>BMJ Open</i>                                                                                                                                                                                                                                                                                                                                                                                                                                                                                                                                                                                                                                                           |
| Manuscript ID                 | bmjopen-2018-023139                                                                                                                                                                                                                                                                                                                                                                                                                                                                                                                                                                                                                                                       |
| Article Type:                 | Protocol                                                                                                                                                                                                                                                                                                                                                                                                                                                                                                                                                                                                                                                                  |
| Date Submitted by the Author: | 24-Mar-2018                                                                                                                                                                                                                                                                                                                                                                                                                                                                                                                                                                                                                                                               |
| Complete List of Authors:     | Lockstone, Jane; Launceston General Hospital, Department of Physiotherapy; The University of Melbourne, Physiotherapy, School of Health Sciences<br>Boden, Ianthe; Launceston General Hospital, Department of Physiotherapy; The University of Melbourne, Physiotherapy, School of Health Sciences<br>Robertson, Iain; University of Tasmania, School of Health Sciences<br>Story, David; The University of Melbourne , Perioperative and Pain Medicine Unit, Melbourne Medical School<br>Denehy, Linda; The University of Melbourne, Physiotherapy, School of Health Sciences<br>Parry, Selina M.; The University of Melbourne, Physiotherapy, School of Health Sciences |
| Keywords:                     | Adult surgery < SURGERY, Adult intensive & critical care < INTENSIVE & CRITICAL CARE, Adult anaesthesia < ANAESTHETICS                                                                                                                                                                                                                                                                                                                                                                                                                                                                                                                                                    |
|                               |                                                                                                                                                                                                                                                                                                                                                                                                                                                                                                                                                                                                                                                                           |

SCHOLARONE™  
Manuscripts

**Study title**

Non-Invasive Positive airway Pressure thErapy to Reduce Postoperative Lung complications following Upper abdominal Surgery (NIPPER PLUS): Protocol for a single centre pilot randomised control trial

**Author names and institutional affiliations**

1. Jane Lockstone, Department of Physiotherapy, Launceston General Hospital, Launceston, TAS, 7250, Australia and, Department of Physiotherapy, The University of Melbourne, Melbourne, VIC, 3052, Australia
2. Ianthe Boden, Department of Physiotherapy, Launceston General Hospital, Launceston, TAS, 7250, Australia and, Department of Physiotherapy, The University of Melbourne, Melbourne, VIC, 3052, Australia
3. Iain K Robertson, Clifford Craig Foundation, Launceston General Hospital, Launceston, TAS, Australia; and, School of Health Sciences, University of Tasmania, Launceston, TAS, 7250, Australia
4. David Story, Perioperative and Pain Medicine Unit, Melbourne Medical School, The University of Melbourne, Melbourne, VIC, 3052, Australia
5. Linda Denehy, Department of Physiotherapy, The University of Melbourne, Melbourne, VIC, 3052, Australia
6. Selina M. Parry, Department of Physiotherapy, The University of Melbourne, Melbourne, VIC, 3052, Australia

**Corresponding author contact details**

Name: Jane Lockstone  
Address: Department of Physiotherapy, Launceston General Hospital, 274-280 Charles St, Launceston TAS 7250, Australia  
Tel: +61 427995761  
Email: [jane.lockstone@ths.tas.gov.au](mailto:jane.lockstone@ths.tas.gov.au)

**Word count: 6484**

## ABSTRACT

**Introduction:** Postoperative pulmonary complications (PPC) are a common serious complication following upper abdominal surgery leading to significant consequences including increased mortality, hospital costs and prolonged hospitalisation. The primary objective of this study is to detect whether there is a possible signal towards PPC reduction with the use of additional intermittent non-invasive ventilation (NIV) compared to continuous high-flow nasal oxygen therapy alone following high-risk elective upper abdominal surgery. Secondary objectives are to measure feasibility of; (1) trial conduct and design, and (2) physiotherapy-led NIV and a high-flow nasal oxygen therapy protocol, safety of NIV and to provide preliminary costs of care information of NIV and high-flow nasal oxygen therapy. **Methods and analysis:** This is a single centre, parallel group, assessor blinded, pilot randomised trial, with 130 high-risk upper abdominal surgery patients randomly assigned via concealed allocation to either (1) usual care of continuous high-flow nasal oxygen therapy for 48 hours following extubation or, (2) usual care plus five additional 30-minute physiotherapy-led NIV sessions within the first two postoperative days. Both groups receive standardised preoperative physiotherapy and postoperative early ambulation. No additional respiratory physiotherapy is provided to either group. Outcome measures will assess incidence of PPC within the first 14 postoperative days, recruitment ability, physiotherapy-led NIV and high-flow nasal oxygen therapy protocol adherence, adverse events relating to NIV delivery and costs of providing a physiotherapy-led NIV and a high-flow nasal oxygen therapy service following upper abdominal surgery. **Ethics and dissemination:** Ethics approval has been obtained from the relevant institution and results will be published to inform future multicentre trials.

**Trial registration number:** ACTRN12617000269336.

**Key words:** general surgery, non-invasive ventilation, postoperative care, postoperative complications

### Article Summary

Strengths and limitations of this study

- This pilot study is a 130-patient parallel group randomised clinical trial of additional early intermittent postoperative NIV versus continuous high-flow nasal oxygen therapy alone.
- This trial is measuring recruitment ability and feasibility of providing physiotherapy-led NIV and a high-flow nasal oxygen therapy protocol.
- This trial standardises physiotherapy and postoperative ambulation.
- This is a pilot, single centre study unlikely to be powered to determine treatment effectiveness.
- Results of this pilot study will assist the design and conduct of future definitive multicentre trials.

## INTRODUCTION

Postoperative pulmonary complications (PPC) are a common serious complication following upper abdominal surgery with a reported incidence of 13-42%<sup>1-6</sup>. Development of a PPC is strongly associated with increased postoperative mortality, morbidity and prolonged hospitalisation<sup>2,3,7</sup>.

There are well-reported pathophysiological effects of anaesthesia and upper abdominal surgery on the respiratory system including prolonged lung volume reductions, diaphragm dysfunction, alveolar collapse and reduced mucociliary clearance<sup>8,9</sup>. The combination of which establishes a pathological environment for bacterial growth and impaired pulmonary gas exchange, which can lead to postoperative respiratory failure and/or pneumonia<sup>10,11</sup>.

Following surgery, respiratory optimisation and support is warranted to avoid respiratory failure and subsequent reintubation<sup>12</sup>. Conventional low-flow oxygen therapy is commonly administered via nasal cannula or a face mask to supplement oxygenation yet may not be effective to compensate for loss of lung volume<sup>13</sup>. Whilst oxygen support alone may be sufficient for low-risk patients in the postoperative period, increased attention to patients at high-risk of PPC development to provide additional therapies that aim to increase postoperative lung volumes may be warranted.

Non-Invasive ventilation (NIV) has been shown to reverse reduced lung volumes induced by anaesthesia and abdominal surgery<sup>11</sup>. During NIV the positive airway pressure throughout the breath cycle may re-open atelectatic alveoli, increase lung volume and improve gas exchange<sup>11</sup>.

Postoperative NIV has been reported to reduce PPC by half, with a further significant sub-group effect specifically for preventing pneumonia<sup>14-16</sup> following upper abdominal surgery. Whilst the optimal preventative NIV intervention dosage parameters are currently undetermined, the timing of postoperative NIV initiation is argued to have an important influence on its effectiveness with earlier application of NIV thought to lead to more successful alveolar recruitment<sup>17-19</sup>. Despite relatively good evidence supporting the use of NIV in the early postoperative period to reduce PPC, the implementation of broad-scale routine prophylactic NIV use is currently unclear but appears to be limited<sup>4,20</sup>. The reasons for which are unknown yet likely multifactorial, including perceived risks, resources required and associated service costs. It is possible that newer modalities such as high-flow nasal oxygen therapy could be a viable and more feasible alternative than preventative NIV to reduce PPC.

1  
2  
3  
4 High-flow nasal oxygen therapy delivers heated and humidified oxygen and/or air via nasal prongs at  
5 a prescribed accurate fraction of inspired oxygen (FiO<sub>2</sub>) and with a maximum flow rate of 60 litres per  
6 minute. This constant high gas flow at the nares creates a flow-dependent, low level of positive  
7 airway pressure between 5 to 8cm H<sub>2</sub>O<sup>21,22</sup>. It is hypothesised that this low level of positive pressure  
8 increases lung volumes and improves oxygenation<sup>23,24</sup> and may potentially decrease the incidence of  
9 respiratory complications post extubation and surgery<sup>25</sup>. Compared with standard oxygen therapy,  
10 high-flow nasal oxygen therapy reduces reintubation rates and desaturation episodes in critically ill  
11 intensive care unit (ICU) patients with acute respiratory failure<sup>26</sup> and reduces the requirement for  
12 escalation of respiratory support following cardiac surgery<sup>27</sup>. When compared to NIV, high-flow nasal  
13 oxygen therapy provided to prevent intubation was superior in reducing 90-day mortality in patients  
14 with acute respiratory failure in ICU<sup>28</sup>. Following cardiothoracic surgery, high-flow nasal oxygen  
15 therapy demonstrated equivalence with NIV in reducing post-surgery reintubation in patients who  
16 developed respiratory failure or were deemed at risk of respiratory failure following post-surgical  
17 extubation<sup>29</sup>.

18  
19  
20  
21  
22  
23  
24  
25  
26  
27 Following major abdominal surgery, it is possible that high-flow nasal oxygen therapy may assist in  
28 preventing PPCs. It could be just as effective as NIV and potentially more feasible in terms of  
29 resources required and service costs. This has yet to be established as all previous NIV clinical trials<sup>14</sup>  
30 investigating the prevention of PPC following abdominal surgery have compared NIV to standard  
31 oxygen therapy alone, never to high-flow nasal oxygen therapy. A recent large multicentre  
32 randomised control trial (RCT) (OPERA trial)<sup>30</sup> demonstrated no benefit in preventing hypoxemia  
33 following major abdominal surgery with the use of preventative high-flow nasal oxygen therapy  
34 compared to standard oxygen therapy. Participants were provided with high-flow nasal oxygen  
35 therapy postoperatively for a median duration of 15 [IQR 12-18] hours following extubation<sup>30</sup>. As  
36 postoperative respiratory failure commonly occurs within 72 hours after surgery<sup>31</sup> and functional  
37 residual capacity is shown to reach its lowest value one to two days following upper abdominal  
38 surgery<sup>32,33</sup> it may be that high-flow nasal oxygen therapy needs to be prescribed for a longer  
39 duration to be clinically effective in preventing PPCs in the postoperative period. It has been  
40 recommended that the utility of postoperative high-flow nasal oxygen therapy in high-risk patients  
41 when used for longer durations be explored<sup>34</sup>.

42  
43  
44  
45  
46  
47  
48  
49  
50  
51  
52 Due to the growing exploratory evidence supporting the theoretical and proposed clinical benefits of  
53 high-flow nasal oxygen therapy<sup>35,36</sup>, clinical uptake has increased<sup>37</sup> and the application of high-flow  
54 nasal oxygen therapy is becoming widespread in intensive care units (ICU)<sup>38</sup> including at our own  
55  
56  
57  
58  
59  
60

1  
2  
3 institution<sup>39</sup> and also in other clinical settings including the ward<sup>40</sup>. Given this increasing use of high-  
4 flow nasal oxygen therapy yet uncertainty regarding the preventative properties, increased  
5 reported patient comfort/tolerance compared to NIV<sup>41</sup> and unknown comparative costs of providing  
6 a NIV and/or high-flow nasal oxygen therapy service to high-risk upper abdominal surgery patients,  
7 this study is designed to detect whether there is a possible signal towards reduction in PPC with the  
8 use of intermittent NIV in addition to continuous high-flow oxygen therapy in the first 48 hours after  
9 surgery and measure the feasibility of providing these interventions. This study is also designed to  
10 understand the associated costs of service delivery for both these therapies. These findings will  
11 assist in designing and conducting future multicentre trials.  
12  
13  
14  
15  
16  
17  
18

### 19 **Pilot work**

20  
21 Prior to commencing this pilot RCT, we undertook an observational study to test the feasibility and  
22 safety of intermittent physiotherapy-led NIV following high-risk elective upper abdominal surgery<sup>39</sup>.  
23 Whilst physiotherapy-led NIV was able to be delivered within 24 hours following surgery and was  
24 shown to be safe in both ICU and ward patients<sup>39</sup>, the main barrier identified to early postoperative  
25 NIV was physiotherapy-service related limitations<sup>39</sup>. Due to lengthy surgeries, a large proportion of  
26 patients did not return to the ward or ICU until after our hospital's standard physiotherapy working  
27 hours. These patients missed receiving the planned initial NIV dose within the target four hours. On  
28 average, our patients received their first NIV session at 18 hours post-surgery. To mitigate this  
29 problem, we implemented a flexible-hour physiotherapy NIV service in the immediate post-  
30 anaesthesia care unit (PACU), also known as the recovery room. Providing NIV in the PACU has been  
31 reported to be feasible and safe<sup>42</sup>.  
32  
33  
34  
35  
36  
37  
38

### 39 **Objectives**

40  
41 This project is a pilot RCT with the aim of planning a future definitive multicentre RCT to compare  
42 the use of additional intermittent physiotherapy-led NIV to continuous high-flow nasal oxygen  
43 therapy alone following elective high-risk upper abdominal surgery to reduce PPC incidence. The  
44 primary objective of this pilot study is to detect whether there is a possible signal towards PPC  
45 reduction with additional NIV compared to high-flow nasal oxygen therapy. Secondary objectives are  
46 to measure the feasibility of; (1) trial conduct and design and (2) physiotherapy-led NIV and a high-  
47 flow nasal oxygen therapy protocol, safety of NIV therapy and to provide preliminary costs of care  
48 information on NIV and high-flow nasal oxygen therapy following upper abdominal surgery. In  
49 addition, this trial will also explore possible effects on post-surgical ICU and hospital length of stay  
50 (LOS), unplanned ICU admission at any time-point during the acute post-surgical stay, incidence of  
51  
52  
53  
54  
55  
56  
57  
58  
59  
60

1  
2  
3 reintubation, in-hospital, 30-day and 12-month all-cause mortality and health related quality of life  
4 (HRQoL). As this study is a pilot there is no formal hypothesis.  
5  
6

## 7 **METHODS**

### 8 **Design**

9  
10 The Non-Invasive Positive airway Pressure therapy to Reduce Postoperative Lung complications  
11 following Upper abdominal Surgery (NIPPER PLUS) trial is a prospective, single centre, assessor  
12 blinded, parallel group, pilot randomised control trial, with patients randomly assigned via concealed  
13 allocation to either usual care (continuous high-flow nasal oxygen therapy for the first 48 hours after  
14 surgery and early standardised mobilisation) or intervention (usual care plus five 30-minute NIV  
15 sessions). Figure 1 outlines the schedule of enrolment, interventions and assessments.  
16  
17

18 Randomisation is stratified to planned post-surgical destination (ward or high dependency unit  
19 (HDU)/ICU). See Figure 2 for a CONSORT diagram of the NIPPER PLUS trial and Table 1 for an  
20 overview of the trial methods and design. The methods are reported in accordance with the  
21 Standard Protocol Items; Recommendations for Interventional Trials<sup>43</sup> (SPIRIT) guidelines for clinical  
22 trials and the Template for Intervention Description and Replication<sup>44</sup> (TIDieR) reporting of  
23 interventions.  
24  
25  
26  
27  
28  
29  
30  
31

### 32 **Patient and Public Involvement**

33 There was no involvement from patients or the public in the development or the design of this trial.  
34  
35

### 36 **Setting**

37 The NIPPER PLUS trial is being undertaken at a large regional primary referral publicly funded  
38 hospital in Australia. The Tasmanian Health Human Research Ethics Committee approved this study  
39 (protocol reference H0016207). This study was prospectively registered on 22<sup>nd</sup> February 2017 prior  
40 to start of study commencement with the Australian New Zealand Clinical Trials Registry  
41 (ACTRN12617000269336).  
42  
43  
44  
45

### 46 **Participants and enrolment**

47 All patients having major surgery at our hospital are required to attend a pre-admission assessment  
48 clinic within six weeks of surgery. At this clinic, any patient listed for elective major abdominal  
49 surgery receives respiratory physiotherapy education on the prevention of PPC and breathing  
50 exercise training<sup>45</sup>. For the NIPPER PLUS trial, all patients are screened by the preoperative  
51 physiotherapist using the Melbourne Risk Prediction Tool (MRPT)<sup>6</sup> to determine if they are at high-  
52 risk of developing a PPC. These patients, and any patient with a planned postoperative admission to  
53  
54  
55  
56  
57  
58  
59  
60



1  
2  
3  
4 ICU or HDU, are invited by the preoperative physiotherapist to participate in the trial. Eligible  
5 patients are provided with a verbal explanation of the trial and provision of written and pictorial  
6 information. Consenting patients are required to sign a written consent form. Where the  
7 preoperative physiotherapist or the eligible patient is unable to attend the preadmission clinic, the  
8 patient is contacted by telephone and invited to enter the trial. The consent form is then signed  
9 during their hospital admission. Participant recruitment began in March 2017 and aims to be  
10 completed by August 2018, with final follow up to be August 2019.

### 15 Eligibility Criteria

#### 17 Inclusions

19 Eligible participants are patients meeting the following criteria:

- 21 1. Adults ( $\geq 18$  years) undergoing elective upper abdominal surgery, able to understand verbal  
22 instructions in English and provide informed consent;
- 24 2. Open and/or hand-assisted laparoscopic upper abdominal surgery with an abdominal  
25 incision longer than 5 cm that is above, or extending above the umbilicus;
- 27 3. At high-risk of PPC defined in hierarchal order; 1. A planned postsurgical admission to  
28 ICU/HDU, 2. Identified at high-risk using the Melbourne Risk Prediction Tool (MRPT)<sup>6</sup>.

#### 32 Exclusions

35 The following exclusion criteria apply:

- 37 1. Pre-existing obstructive sleep apnoea where overnight continuous positive airway pressure  
38 is required
- 40 2. Extreme claustrophobia and inability to tolerate use of a NIV facemask
- 42 3. Current hospital patient for a separate episode of care
- 43 4. Patients requiring oesophageal surgery or organ transplant
- 45 5. Any absolute contraindications for NIV in the period following surgery prior to first NIV  
46 session (Table 2)

#### 49 Randomisation and Allocation

51  
52 A research assistant independent to the trial prepared 130 sequentially numbered (1-130) opaque  
53 envelopes each containing an allocation card wrapped in aluminium foil. Allocation sequence is  
54 generated by a web-based computer program (<http://www.randomizer.org/>). Random allocation is  
55

1  
2  
3 stratified to planned postsurgical destination (ICU and Ward). One of the aims of this study is the  
4 feasibility of high-flow nasal oxygen therapy and NIV application. The ease of application could be  
5 biased towards it being more or less feasible in one location over another. Stratification ensures that  
6 there will be equal representation of participants at both locations. At our centre, historical  
7 data finds that approximately 70% of high-risk upper abdominal surgery patients have a planned  
8 postoperative ICU admission. To manage this difference in location distribution, the total sample size  
9 of 130 is divided into two blocks with 90 in the ICU block and 40 in the Ward block. The allocation  
10 sequence in each block is then determined in a 1:1 ratio, control and intervention. Following  
11 construction of the randomisation envelopes the allocation sequence is locked securely in the  
12 hospital's research institute and unavailable to site investigators, those who enrol participants  
13 and/or assign interventions.

14  
15  
16 If it arises that the ratio of eligible ward or ICU patients is different than previously ascertained this  
17 will mean that one of the blocks (two blocks stratified to location: ICU or ward) of envelopes will  
18 become exhausted prior to completion of the trial. If this occurs the next available envelope for the  
19 other intended postoperative location (ICU or ward), regardless of the actual postoperative location,  
20 will be opened in sequence and so on until the minimum target sample of 130 is met. If the situation  
21 occurs where the minimum sample is achieved prior to the completion of the funded time period  
22 (see sample size section), a block of non-stratified allocation opaque sealed envelopes will be  
23 constructed by an independent administration assistant using the same web-based computer  
24 randomisation program at a 1:1 ratio (control:intervention) in a single block of 15, and then  
25 repeated as necessary until trial completion.

26  
27  
28 Entry into the trial is finalised at the end of the surgical procedure where the post-surgical  
29 destination is confirmed and exclusion criteria assessed. Eligible consenting patients are then  
30 randomised into the trial by a site investigator by opening the next sequentially numbered sealed  
31 opaque envelope according to the patient's planned postsurgical destination (ward or ICU/HDU).  
32 Once opened, participant's details are written on the envelope to ensure that patients were  
33 randomised in presenting order and these are filed securely along with the signed consent form. If a  
34 patient is identified as ineligible following surgery completion, they will not be randomised nor  
35 entered into the trial. Participants are randomly assigned to receive either i) continuous high-flow  
36 nasal oxygen therapy for 48 hours following extubation (control group) or ii) continuous high-flow  
37 nasal oxygen therapy for 48 hours following extubation plus five 30 minute sessions of NIV  
38 implemented by a physiotherapist over the first two postoperative days (intervention group).

## Interventions

### Control Group (Usual Care)

All participants receive preoperative respiratory physiotherapy education and training<sup>45</sup>. Postoperatively, an early ambulation program is provided as per a standardised protocol<sup>46</sup> of once daily physiotherapy-directed assisted ambulation (Table 3). Participants are provided with early ambulation until a threshold score is met using a criteria-lead scoring tool<sup>47</sup>, or until discharged from hospital, whichever occurs first. If a participant is referred for a mobility review, progression of gait aid or a stairs assessment following discharge from physiotherapy, the participant will be treated at the discretion of the ward physiotherapist and this occasion of service recorded. Following surgery, no respiratory physiotherapy is provided to either group unless the participant develops the primary endpoint - a PPC, physiotherapy will then be provided at the discretion of the attending physiotherapist. The type of treatment/s provided will be documented.

On the day of surgery, a site investigator documents high-flow nasal oxygen therapy orders on each consenting patient's post-anaesthetic observation chart to instruct theatre nursing staff to initiate high-flow nasal oxygen therapy as soon as possible following extubation. These orders specify that the FiO<sub>2</sub> is to be titrated to achieve a saturation of peripheral oxygen (SpO<sub>2</sub>) between 92 -96%<sup>48</sup> unless otherwise specified by the attending anaesthetist/ICU consultant. Gas flow rate is set at 50 litres per minute. If a participant is unable to tolerate this flow rate, it can be reduced to a minimum of 30 litres per minute. High-flow nasal oxygen therapy is to be provided continuously for 48 hours from the time of extubation. Changes to flow rate and any removal of high-flow nasal oxygen therapy for more than 15 minutes during the 48-hour period are recorded.

All other aspects of perioperative patient care, including the type of anaesthesia, postoperative analgesia, surgical techniques, and postoperative clinical care are provided at the discretion of the anaesthesia and surgical teams and according to routine clinical practice at our centre. Pragmatically, there will be no attempt to standardise perioperative management or intraoperative ventilation strategies for this study. Our hospital is currently not recognised as an enhanced recovery after surgery (ERAS) site however some individual anaesthesia and surgical teams within our hospital adhere to ERAS principles.

### Intervention Group

Care is provided as per the control group above, with the exception of five, 30-minute<sup>11</sup> NIV sessions delivered by a physiotherapist over the first two postoperative days in addition to high-flow nasal

1  
2  
3 oxygen therapy. The initial NIV dose is delivered within four hours of extubation, followed by twice  
4 daily sessions on postoperative day one and two. This service is provided in the PACU, ICU/HDU, or  
5 the surgical ward depending on the participant's location at the time of NIV delivery.  
6  
7

8  
9 Prior to commencing each NIV session all participants are assessed for absolute contraindications for  
10 NIV therapy by the treating physiotherapist (Table 2). The NIV sessions are delivered using a ResMed  
11 VPAP™ machine (ResMed Ltd, Oxfordshire, UK) with a humidified circuit and standard facemask.  
12 This is delivered with participants either sitting up in bed with the bed head raised between 45 – 90  
13 degrees or with the participant sitting out of bed in a high back chair. Expiratory positive airway  
14 pressure (EPAP) is set at 10cmH<sub>2</sub>O<sup>11</sup>. Inspiratory positive airway pressure (IPAP) is initially set at  
15 15cmH<sub>2</sub>O and adjusted as required to achieve tidal volumes of at least 6-8mls/kg. Participants with  
16 BMI > 30 have a starting EPAP set at 12cmH<sub>2</sub>O and a starting IPAP set at 16cmH<sub>2</sub>O. Deviations from  
17 these planned settings are reported and documented. The difference between IPAP and EPAP  
18 (known as pressure support ventilation; PSV) is maintained at a minimum of 4cmH<sub>2</sub>O and the  
19 maximum total pressure (PSV + EPAP) will be no greater than 25cmH<sub>2</sub>O<sup>11</sup>.  
20  
21  
22  
23  
24  
25  
26

27 If a participant is unable to tolerate the set pressures, reassurance is firstly given to the participant  
28 and the following modifications taken in sequential order, until patient tolerance is achieved:  
29  
30

- 31 1. Reduce EPAP to 8cmH<sub>2</sub>O (set minimum)
- 32 2. Reduce IPAP to 12cmH<sub>2</sub>O (set minimum) in decrements of 1cmH<sub>2</sub>O

33 If the participant remains unable to tolerate the therapy despite pressure titration and reassurance,  
34 cessation of NIV therapy will occur and be reported. Pressure rise time is set at the slowest speed  
35 (900ms) and the inspiratory trigger is set to the minimum value. Air-leaks are managed by fitting the  
36 correct sized mask carefully using the mask measure guide provided by ResMed with focus on  
37 minimising leaks around the nasogastric tube if present. The ResMed VPAP™ compensates for air  
38 leaks up to 40 litres per minute. Above this a 'high-leak' alarm sounds and the machine is unable to  
39 deliver the set pressure. Any high-leak alarm is monitored, recorded and the mask readjusted  
40 accordingly. Ideally the duration of NIV is to be 30 minutes of continuous therapy, however if NIV  
41 therapy needs to be temporarily stopped, therapy time will cease and reason documented. Once  
42 therapy is re-started, timing will recommence. If a participant is unable to continue with NIV therapy  
43 within 5 minutes of temporarily ceasing, the session is terminated and the reason documented.  
44 Supplemental oxygen is titrated through the ResMed VPAP™ as required to achieve SpO<sub>2</sub> 92-96%  
45 unless otherwise specified by the medical team. During each NIV session participants have their  
46 high-flow nasal oxygen therapy removed for the duration of NIV therapy and replaced once therapy  
47  
48  
49  
50  
51  
52  
53  
54  
55  
56  
57  
58  
59  
60

1  
2  
3  
4 is finished. The treating physiotherapist continuously monitors all participants for the duration of the  
5 NIV therapy and re-assesses 30-minutes post intervention. Data including; blood pressure, heart  
6 rate, respiratory rate and SpO<sub>2</sub> is recorded pre, immediately post and 30-minutes after each NIV  
7 session. Any reason resulting in early cessation of NIV intervention or being unable to provide NIV  
8 therapy is reported.  
9  
10

11  
12  
13 All physiotherapists providing the intervention attend NIV training with the ICU Senior  
14 Physiotherapist who has 11 years' experience in NIV application. The training session includes  
15 familiarisation with the ResMed VPAP™ machine, set-up of equipment, detailed explanation of the  
16 intervention protocol and trouble-shooting. The physiotherapists are provided with a training  
17 manual and a copy of this manual is also kept with the ResMed VPAP™ to allow reference at any  
18 point during the intervention. The training manual consists of all the information provided in the  
19 training session. The years of hospital experience of each participating physiotherapist is reported.  
20  
21  
22  
23  
24

#### 25 **Withdrawal from trial**

26  
27 Participants are withdrawn for i) requiring longer than 48 hours of mechanical ventilation following  
28 surgery, or ii) withdrawal of consent. All withdrawals are reported.  
29  
30

#### 31 **Outcomes**

32  
33  
34 To detect a possible signal towards PPC reduction with the use of NIV in addition to continuous high-  
35 flow oxygen therapy in the first 48 hours after surgery, the primary outcome measure is the  
36 development of a PPC within the first 14 postoperative days or hospital discharge whichever occurs.  
37 Using the Melbourne Group Scale (MGS) diagnostic Tool Version 2<sup>45</sup> (Table 4) a PPC is diagnosed  
38 when four or more of eight screening criteria are present in a 24-hour day. The MGS tool is valid and  
39 reliable<sup>49</sup>, is sensitive to therapeutic interventions designed to ameliorate postoperative atelectasis  
40 and alveolar de-recruitment<sup>46</sup>, and widely utilised in upper abdominal surgery trials<sup>4-6</sup>. A blinded  
41 assessor assesses participants prospectively and daily for a PPC until the seventh postoperative day.  
42 Thereafter, additional PPC assessments are only performed if clinically indicated when there are  
43 signs of respiratory deterioration reported in the medical record until postoperative day 14 or  
44 hospital discharge, whichever occurs first. To reduce the potential for missing data, retrospective  
45 collection of PPC data from the daily medical record will occur when a participant or assessor is  
46 unavailable for PPC assessment. Participants scoring three out of the possible eight factors are  
47 assessed twice daily to monitor for any further clinical deterioration. A blinded senior  
48 physiotherapist confirms a positive diagnosis of a PPC.  
49  
50  
51  
52  
53  
54  
55  
56  
57  
58  
59  
60

### Feasibility measures of trial conduct, design and protocol

- 1) Consent and recruitment ability. Consent rate is anticipated to be  $\geq 90\%$  with recruitment of one to two patients per week.
- 2) Protocol adherence of physiotherapy-led NIV therapy. Successful physiotherapy-led NIV implementation is set at  $\leq 20\%$  protocol deviations. This is measured and reported by;
  - a. Proportion of intervention participants who receive the first NIV session within four hours of surgical- extubation.
  - b. Proportion of intervention participants who receive five, 30-minute NIV sessions in the first two postoperative days.
  - c. Reasons why NIV therapy could not be delivered or were ceased early.
- 3) Protocol adherence of high-flow nasal oxygen therapy. Successful high-flow nasal oxygen therapy implementation is set at  $< 20\%$  protocol deviations. This is measured and reported by;
  - a. Proportion of participants who receive high-flow nasal oxygen therapy for 48 continuous hours following surgical-extubation.
  - b. Time in minutes from extubation following surgery to commencement of high-flow nasal oxygen therapy.
  - c. Reasons why high-flow nasal oxygen therapy cannot be delivered or sustained.
- 4) Safety of NIV therapy measured by; (i) major adverse events relating to NIV therapy defined as; anastomotic leak suspected and confirmed; severe hypotension requiring an increase in medical management; cardiac and/or respiratory arrest; deterioration in medical condition requiring an increase in medical management and (ii) any transient physiological events during or immediately following NIV intervention (Table 2).
- 5) Costs of a high-flow nasal oxygen therapy and physiotherapy-led NIV therapy service measured by; costs of equipment (NIV masks, high-flow and NIV circuits, cleaning and machine service costs); physiotherapy time (in hours) attributed to delivering the NIV therapy and costs of an ICU and hospital stay measured by average cost of a bed day.

### Secondary exploratory outcomes

- 1) Incidence of Pneumonia<sup>50</sup> defined as new CXR infiltrates with at least two of: temp >38 °C, SOB, cough and purulent sputum, altered respiratory auscultation and WCC >12,000/ml or leukopenia (<3000/ml), within the first 14 postoperative hospital days or hospital discharge whichever occurs first.
- 2) Incidence of systemic inflammatory response syndrome (SIRS) as defined by 2 or more of the following: temp >38 or <36; HR>90; RR>20, or PCO<sub>2</sub><32, or ventilation for acute process; WCC>12 or <4, within the first 14 postoperative hospital days or hospital discharge whichever occurs first.
- 3) Incidence of sepsis, defined as a Sequential Organ Failure Assessment (SOFA) score ≥ 2, within the first 14 postoperative hospital days or hospital discharge whichever occurs first.
- 4) Post-surgical ICU and hospital length of stay (LOS) in days.
- 5) Unplanned ICU admission at any time-point during the acute post-surgical stay.
- 6) Incidence of reintubation at any time-point during the acute post-surgical stay.
- 7) In-hospital mortality, 30-day and 12-month mortality.
- 8) Health Related Quality of Life (HRQoL) using the EQ-5D-5L<sup>51</sup> preoperatively, postoperative day seven and day 14 and at 12-months postoperatively.

### Blinding

Random allocation occurs following completion of surgery. This ensures pre-admission and operating theatre medical, nursing, and physiotherapy staff are masked to postoperative group assignment. Postoperatively, PPC assessors are independent of routine postoperative clinical care and masked to group allocation. All physiotherapy documentation relating to the NIV intervention is documented and filed separately to ensure PPC assessors remain blinded for the first seven postoperative days and then added to the patient's medical file. If a treatment group participant informs the PPC assessor of their group allocation this is noted and reported. Due to the nature of intervention, postoperative ward staff including nurses, doctors and treating physiotherapists are unable to be blinded.

## Data collection

### Preoperative variables

To measure baseline characteristics the following variables are collected directly from the participant or the medical record: age (years), gender, height (cm), weight (kg), body mass index ( $\text{kg}/\text{cm}^2$ ), planned surgical procedure, surgical category and reason for the procedure, physical health status according to the American Society of Anaesthesiologists (ASA) and rated by the attending anaesthetist at the PAC (score 1 to 5), smoking history (non-smoker, current smoker or ex-smoker having ceased more than 8 weeks preoperatively), smoking pack years (1 pack year = 20 cigarettes per day for 1 year), years since smoking cessation, respiratory status including auscultation signs and  $\text{SpO}_2$  (%) on room air, cough strength and presence of sputum, participant-reported history of a chest infection in the previous two weeks, functional co-morbidity index<sup>52</sup>, participant-reported estimated maximum metabolic equivalent physical activity using a self-rated physical Specific Activity Questionnaire<sup>53</sup> and any limiting factor to ambulation.

### Intraoperative variables

The following variables are collected from the anaesthetic record, operation report and medical record: duration of anaesthesia (in minutes) during surgery; mechanical ventilation parameters including mode of ventilation, level of pressure/volume control, positive end expiratory pressure used and any recruitment manoeuvres performed; average  $\text{FiO}_2$  during surgery; type and amount of intraoperative fluid delivered ( $\text{ml}/\text{kg}/\text{h}$ ); number and type of blood transfusion units; incision type.

### Postoperative variables

Postoperative data is collected daily for the first 14 days or until hospital discharge, whichever occurs first for the following variables: time in days from the preoperative physiotherapy session to the operation; location (ICU or surgical ward) and duration in days at each location; duration of analgesia and type (epidural, constant opioid infusion, patient controlled analgesia, patient controlled epidural analgesia, oral, local pain infusion, or other); unplanned ICU admission and ICU LOS; hospital LOS; hours of mechanical ventilation; days of vasopressor use; days and types of oxygen therapy use; total days of nasogastric tube; day and diagnosis of a prolonged postoperative ileus using a standardised criteria<sup>54</sup> of 2 or more of the following factors in a 24-hour period including nausea/vomiting, inability to tolerate normal diet, absence of flatus, abdominal distension, radiologic confirmation, and physician diagnosis of ileus. Postoperative NIV parameters are collected including, time in hours from extubation following surgery to the first NIV session; time each NIV



1  
2  
3 session is delivered and the grade/seniority of the treating physiotherapist providing the NIV;  
4 position of the patient during NIV; duration in minutes of each NIV session; IPAP and EPAP used;  
5 pressure titration – reasons if pressure titration occurs and the pressures used; number of times NIV  
6 has to temporarily ceased prior to the planned 30-minute session; reasons NIV was unable to be  
7 delivered to the participant; any major adverse or transient physiological event which occurs as a  
8 direct result of NIV therapy. Postoperative high-flow nasal oxygen therapy parameters are collected  
9 including; time in minutes from extubation following surgery onto high-flow nasal oxygen therapy;  
10 time and date high-flow nasal oxygen therapy is removed; duration in hours of high-flow nasal  
11 oxygen therapy within the first 48 postoperative hours; number of times high-flow nasal oxygen  
12 therapy is removed for greater than 15 minutes within the first two postoperative days; average  
13 flow rate during the first two postoperative days; average FiO<sub>2</sub> during the first two postoperative  
14 days; reasons a participant is unable to have postoperative high-flow nasal oxygen therapy for the  
15 first two postoperative days. Early ambulation parameters are collected including: time in hours  
16 from end of surgery until time to ambulation >1 min; postoperative day walked longer than 10 min;  
17 maximum rating of perceived exertion during ambulation at each session; maximum ambulation  
18 stage attained at each session and reasons for a participant being unable to participate in an  
19 ambulation session.  
20  
21  
22  
23  
24  
25  
26  
27  
28  
29

### 30 31 **Sample Size**

32  
33 This RCT is a pilot trial that has been funded to be conducted for a defined time period (18 months).  
34 Current surgical throughput of eligible patients at our hospital predicts that we will recruit a sample  
35 of 130 eligible participants (65 per group) in the trial period. If this sample is not reached within the  
36 funded time period, recruitment will continue until a minimum sample of 130 is met. If this sample is  
37 reached prior to the designated funding period (18 months), recruitment will continue past 130,  
38 until this time period is completed. A baseline PPC rate of 18% for the control group (high-flow nasal  
39 oxygen therapy alone) is anticipated based on historical LIPPSMAck POP<sup>46</sup> data (n=101) of matched  
40 high-risk elective upper abdominal surgery participants who were given the same standardised pre-  
41 and postoperative physiotherapy as planned in NIPPER PLUS.  
42  
43  
44  
45  
46  
47

48 Previous systematic reviews in NIV to prevent pneumonia following surgery report a relative risk  
49 reduction of approximately 60%<sup>14 55</sup>. Using inference for proportion calculations for two independent  
50 samples; a total sample of 130 (2 groups of 65) would detect a 50% relative risk reduction in PPC  
51 between groups (favouring the NIV group, one-sided alpha at 0.05) with only 44% power. This  
52 sample will only be adequately powered (80%) if there is a large 75% relative risk reduction in PPC  
53 with the application of NIV (18% down to 4%).  
54  
55  
56  
57  
58  
59  
60

1  
2  
3 Assuming that NIV is superior to high-flow nasal oxygen therapy, an adequately powered study  
4 would need a sample of at least 450 (relative risk reduction 50% from a baseline of 18%, alpha two-  
5 sided 0.05, beta 80%) which would require a multicentre approach. However, there is also the  
6 possibility that high-flow nasal oxygen therapy is just as effective as NIV to prevent PPC. This would  
7 require a non-inferiority trial and would require a much larger sample.  
8  
9

10  
11 This pilot study aims to measure the feasibility of the intervention protocol and provide a baseline  
12 estimate of effect to assist in determining the design (superiority or non-inferiority) and conduct of a  
13 future multicentre RCT.  
14  
15

### 16 17 **Methods: Data collection, management and analysis**

18  
19 Data is collected from participants using a standardised electronic case report form and stored on a  
20 password protected electronic hard drive. Research assistants and site investigators responsible for  
21 data collection are trained directly by the principal investigator to ensure correct data handling. Any  
22 data or participant lost to follow-up will be reported. Once each participant's data set is completed,  
23 it is de-identified, entered into a main database, locked, and maintained securely by the principal  
24 investigator. All data, consent forms and relevant correspondence are stored according to Australian  
25 privacy laws and archived for a minimum of 12 years. On completion of the trial, the database will be  
26 made available for independent analysis or as an appendix in the publishing journal if requested.  
27  
28  
29  
30  
31

### 32 33 **Statistical methods**

34  
35 The prognostic strength and size of imbalances due to potential confounding baseline variables  
36 between groups will be assessed. Adjustment covariates will be selected by backward stepwise  
37 regression from covariates that may have the potential for clinically significant alterations in effect  
38 sizes. These include: history of a respiratory comorbidity, smoking history, age, length in time of  
39 operation, operation category (upper gastrointestinal, colorectal, urological, other), incision type  
40 and location<sup>56</sup>, intraoperative ventilation strategies<sup>357</sup>, fluid delivery<sup>58</sup>, blood transfusions<sup>59</sup>, and  
41 mode of post-operative analgesia<sup>60</sup>.  
42  
43  
44  
45

46  
47 The primary outcomes of absolute and relative rates of PPC in the trial groups will be estimated  
48 using multivariate robust random effects Poisson generalised linear modelling to allow assessment  
49 of binary outcomes with or without adjustment for potential confounding variables (incidence rates  
50 and rate ratios, 95 % confidence intervals, P-values). In addition, the effect of time from the end of  
51 surgery/anaesthesia to diagnosis of PPC will be compared using Cox proportional hazards regression  
52 with and without covariate adjustment (hazards ratio, 95 % confidence intervals, P-values). Graphic  
53 representation of this analysis will be performed using the Kaplan-Meier method.  
54  
55  
56  
57  
58  
59  
60

1  
2  
3  
4 Although this study is not adequately powered, a number of secondary outcomes will be treated as  
5 time-to-event analyses, with hazard ratios estimated using Cox proportional hazards regression: 1)  
6 The day of first diagnosis of other events will be recorded (pneumonia, SIRS, sepsis, reintubation,  
7 death); 2) Treatment group comparison for time from surgery to readiness for discharge, and to  
8 actual discharge (LOS), will be made using Cox proportional hazards regression, with successful  
9 discharge treated as censoring “failure” and death or no discharge within 30 days treated as  
10 censoring “non-failure”. Binomial secondary outcomes including unplanned ICU admission,  
11 unplanned reintubation will be analysed using mixed effects Poisson regression. Secondary  
12 outcomes with irregular distributions, including length of time periods (ICU and total post-operative  
13 LOS) and HRQoL, will be evaluated for group differences using mixed effects ordered logistic  
14 regression, with mean time (95 % CI) estimated for descriptive purposes using mixed effects linear  
15 regression. An intention-to-protocol sensitivity analysis will be performed by excluding from the  
16 analysis any participant who did not undergo the planned postoperative NIV intervention treatment.  
17 The sensitivity of the outcome estimates to missing data will be evaluated using multiple imputation.  
18 All analyses will be performed using Stata version 14 or later (StataCorp, College Station, TX, USA)  
19 and analysed on an intention-to-treat basis.  
20  
21  
22  
23  
24  
25  
26  
27  
28

## 29 **Methods: Monitoring**

### 30 **Data monitoring**

31  
32 The steering committee consists of the principal investigator, local investigator and two academic  
33 supervisors who contribute to the design and revision of this study protocol. The principal and local  
34 investigators are responsible for the study administrative management and daily co-ordination of  
35 the trial ensuring appropriate trial conduct, record keeping and data management.  
36  
37  
38  
39

40 An independent Data and Safety Monitoring Board (DSMB) monitors the ethics of the study in  
41 accordance with the Declaration of Helsinki overseeing safety and conduct of the study.  
42  
43

44 For the trial, there is a stopping rule for the potential of NIV or high-flow nasal oxygen therapy to be  
45 harmful. An unacceptable rate of anastomotic leakage of over 2.5% will trigger consideration for trial  
46 termination by the independent DSMB established for the oversight of this clinical trial. To detect a  
47 2.5% anastomotic leakage rate in either group requires a minimum of 57 patients (one-sample test  
48 of proportion compared to hypothetical 0.1% rate; power 80%; alpha 0.05). Analysis of anastomotic  
49 leakage rates only in both groups will therefore be performed at participant recruitment number 60  
50 using cumulative summation analysis<sup>61</sup>.  
51  
52  
53  
54  
55  
56  
57  
58  
59  
60

1  
2  
3 Any other major adverse events directly relating to the interventions will be reported with oversight  
4 from the independent DSMB.  
5  
6

### 7 **Ethics and Dissemination**

8  
9  
10 The Tasmanian Health Human Research Ethics Committee has granted ethical approval for this trial.  
11 Trial results will be disseminated widely through conference presentations and peer-review journal  
12 publications.  
13  
14

### 15 **DISCUSSION**

16  
17  
18 Consequences of PPCs following upper abdominal surgery are well defined, leading to great interest  
19 in their prevention. High-risk patients have been shown to be over eight times more likely to develop  
20 a PPC compared to individuals identified as low-risk<sup>6</sup> suggesting increased attention is required to  
21 improve postoperative outcomes in this high-risk cohort.  
22  
23  
24  
25

26 Whilst previous clinical studies support the use of preventative NIV therapy following major  
27 abdominal surgery<sup>14</sup>, implementation of NIV therapy does not appear to be standard postoperative  
28 care<sup>4 20</sup> and a number of important methodological limitations exists in previous literature including  
29 high-bias risk and minimal reporting of adverse events<sup>14</sup>. Recommendations for future research from  
30 the most recent Cochrane review in 2014 include; evaluating the use of NIV in preventing mortality,  
31 a targeted approach investigating patients at higher risk for PPCs and must report on all adverse  
32 effects of preventative postoperative NIV<sup>14</sup>. The NIPPER PLUS study is designed to begin targeting  
33 these recommendations by collecting and reporting on in-hospital, 30-day and 12-month all-cause  
34 mortality for all participants and is recruiting participants identified as high-risk of developing a PPC  
35 only. High-risk for this study has been defined as either; eligible patients with a planned  
36 postoperative admission to ICU/HDU due to this factor being independently associated with the  
37 development of a PPC<sup>6</sup> or eligible patients Identified at high risk using the MRPT<sup>6</sup>. The MRPT has  
38 been shown to be specific and sensitive in the identification of individuals who are at highest risk of  
39 PPC development in the surgical settings including upper abdominal surgery<sup>5 6</sup>.  
40  
41  
42  
43  
44  
45  
46  
47  
48

49 Preventative NIV was associated with no major complications in our observational study<sup>39</sup> and the  
50 NIPPER PLUS trial aims to further support this finding by reporting on any adverse event as well as  
51 transient physiological events directly relating to NIV therapy during, immediately following and 30-  
52 minutes after therapy, therefore contributing to necessary and strongly recommended NIV safety  
53 data for both ICU and ward patients.  
54  
55  
56  
57  
58  
59  
60

1  
2  
3 All previous preventative NIV clinical trials in abdominal surgery compare NIV to standard oxygen  
4 therapy only<sup>14</sup>, however the application of high-flow nasal oxygen therapy is becoming widespread  
5 in ICUs<sup>38</sup> and in other clinical settings<sup>25</sup>. The NIPPER PLUS study is designed with high-flow nasal  
6 oxygen therapy as standard care to match current clinical practice within our ICU unit and aims to  
7 detect whether there is a possible signal towards PPC reduction with the use of additional  
8 intermittent NIV compared to continuous high-flow oxygen therapy alone. The NIPPER PLUS trial is a  
9 single-centre study. The effect of high-flow nasal oxygen therapy in high-risk upper abdominal  
10 surgery patients is currently unclear. Prior to undertaking expensive fully powered multicentre trials  
11 there is a need to build evidence and data from pilot trials for realistic effect size variability  
12 estimation and to measure the design, feasibility, safety and potential challenges of treatment  
13 protocols. This pilot study aims to inform future definitive trial design and conduct. Indeed, it may be  
14 demonstrated that this protocol is unfeasible in its current form and would be futile to progress to  
15 multicentre trials without study and protocol re-design.

16  
17  
18  
19  
20  
21  
22  
23  
24  
25 In conclusion, the NIPPER PLUS trial is a single-centre, assessor-blinded, parallel group, pilot RCT,  
26 which aims to detect whether there is a possible signal towards PPC reduction with the use of  
27 additional intermittent NIV compared to continuous high-flow oxygen therapy alone following high-  
28 risk elective upper abdominal surgery. This trial is measuring recruitment ability, feasibility of  
29 implementing a physiotherapy-led NIV and high-flow nasal oxygen therapy protocol, safety of NIV  
30 therapy and preliminary costs of care information on a NIV and high-flow nasal oxygen therapy  
31 service. This will assist in the design and conduct of future multicentre trials. In addition, this trial  
32 will also explore possible effects on post-surgical ICU and hospital LOS, unplanned ICU admission,  
33 reintubation rates, in-hospital, 30-day and 12-month mortality. This trial standardises preoperative  
34 and postoperative physiotherapy care and is currently recruiting.

35  
36  
37  
38  
39  
40  
41  
42  
43  
44  
45  
46  
47  
48  
49  
50  
51  
52  
53  
54  
55  
56  
57  
58  
59  
60

### **Acknowledgements**

We would like to thank all staff in the intensive care unit, the surgical ward, the post anaesthesia care unit and pre-admission clinic at Launceston General Hospital; all physiotherapists providing the interventions and research assistant; Bronte Biggins-Tosch for her dedication and thoroughness. Lastly, we would like to thank all the participants on their assistance in contributing to the body of knowledge in this area.

### **Author Contributions**

IB and JL conceived and designed the study and coordinated the trial. LD and SMP assisted in final study design and protocol. JL prepared the first draft of the protocol manuscript, and was responsible for the final manuscript. All authors (JL, IB, IKR, LD, DS and SMP) revised all manuscript drafts, approved the final manuscript and contributed intellectually important content. JL is the guarantor of the paper and takes responsibility for the integrity of the work as a whole, from inception to published article

### **Funding**

This work was supported by the Clifford Craig Foundation, Launceston, Australia (Project 160). The funding body has no influence on the study design, collection or data analysis or publication of results

### **Ethics approval**

The trial is being conducted in accordance with the Declaration of Helsinki and has undergone ethics review by the Tasmanian Health Human Research Ethics Committee and received approval 08/02/2017 (protocol reference H0016207). All participants will provide written informed consent.

### **Conflict of interest declaration**

The authors have no conflicts of interests

## References

1. Schultz MJ, Hemmes SN, Neto AS, et al, LAS VEGAS investigators. Epidemiology, practice of ventilation and outcome for patients at increased risk of postoperative pulmonary complications: LAS VEGAS - an observational study in 29 countries. *Eur J Anaesthesiol* 2017;34(8):492-507. doi: 10.1097/EJA.0000000000000646
2. Neto AS, Hemmes, S. N., Barbas, C. S., et al, PROVE Network Investigators. Incidence of mortality and morbidity related to postoperative lung injury in patients who have undergone abdominal or thoracic surgery: a systematic review and meta-analysis. *The Lancet Respiratory Medicine*, 2014;12(2):1007-15.
3. Hemmes SN, Gama de Abreu M, Pelosi P, et al. PROVE Network Investigators for the Clinical Trial Network of the European Society of Anaesthesiology. High versus low positive end-expiratory pressure during general anaesthesia for open abdominal surgery (PROVHILO trial): a multicentre randomised controlled trial. *Lancet* 2014;384(9942):495-503. doi: 10.1016/S0140-6736(14)60416-5 [published Online First: 2014/06/05]
4. Haines KJ, Skinner EH, Berney S, et al. Association of postoperative pulmonary complications with delayed mobilisation following major abdominal surgery: an observational cohort study. *Physiotherapy* 2013;99(2):119-25. doi: 10.1016/j.physio.2012.05.013 [published Online First: 2012/12/12]
5. Parry S, Denehy L, Berney S, et al. Clinical application of the Melbourne risk prediction tool in a high-risk upper abdominal surgical population: an observational cohort study. *Physiotherapy* 2014;100(1):47-53. doi: 10.1016/j.physio.2013.05.002 [published Online First: 2013/08/21]
6. Scholes RL, Browning L, Sztendur EM, et al. Duration of anaesthesia, type of surgery, respiratory co-morbidity, predicted VO2max and smoking predict postoperative pulmonary complications after upper abdominal surgery: an observational study. *Aust J Physiother* 2009;55(3):191-8. [published Online First: 2009/08/18]
7. Fernandez-Bustamante A, Frenzl G, Sprung J, et al. Postoperative Pulmonary Complications, Early Mortality, and Hospital Stay Following Noncardiothoracic Surgery: A Multicenter Study by the Perioperative Research Network Investigators. *JAMA Surg* 2017;152(2):157-66. doi: 10.1001/jamasurg.2016.4065 [published Online First: 2016/11/10]
8. Miskovic A, Lumb AB. Postoperative pulmonary complications. *Br J Anaesth* 2017;118(3):317-34. doi: 10.1093/bja/aex002 [published Online First: 2017/02/12]
9. Warner DO. Preventing postoperative pulmonary complications: the role of the anesthesiologist. *Anesthesiology* 2000;92(5):1467-72. [published Online First: 2000/04/26]
10. Van Kaam AH, Lachmann RA, Herting E, et al. Reducing atelectasis attenuates bacterial growth and translocation in experimental pneumonia. *Am J Respir Crit Care Med* 2004;169(9):1046-53. doi: 10.1164/rccm.200312-1779OC [published Online First: 2004/02/24]
11. Jaber S, Chanques G, Jung B. Postoperative noninvasive ventilation. *Anesthesiology* 2010;112(2):453-61. doi: 10.1097/ALN.0b013e3181c5e5f2 [published Online First: 2010/01/14]
12. Ruscic KJ, Grabitz SD, Rudolph MI, et al. Prevention of respiratory complications of the surgical patient: actionable plan for continued process improvement. *Curr Opin Anaesthesiol* 2017;30(3):399-408. doi: 10.1097/ACO.0000000000000465 [published Online First: 2017/03/23]
13. Futier E, Jaber S. High-flow nasal cannula following extubation: is more oxygen flow useful after surgery? *Intensive Care Med* 2015;41(7):1310-3. doi: 10.1007/s00134-015-3902-2 [published Online First: 2015/06/17]
14. Ireland CJ, Chapman TM, Mathew SF, et al. Continuous positive airway pressure (CPAP) during the postoperative period for prevention of postoperative morbidity and mortality following

- major abdominal surgery. *Cochrane Database Syst Rev* 2014(8):CD008930. doi: 10.1002/14651858.CD008930.pub2 [published Online First: 2014/08/02]
15. Ferreyra GP, Baussano I, Squadrone V, et al. Continuous positive airway pressure for treatment of respiratory complications after abdominal surgery: a systematic review and meta-analysis. *Ann Surg* 2008;247(4):617-26. doi: 10.1097/SLA.0b013e3181675829 [published Online First: 2008/03/26]
16. Jaber S, Lescot T, Futier E, et al. Effect of Noninvasive Ventilation on Tracheal Reintubation Among Patients With Hypoxemic Respiratory Failure Following Abdominal Surgery: A Randomized Clinical Trial. *JAMA* 2016;315(13):1345-53. doi: 10.1001/jama.2016.2706 [published Online First: 2016/03/16]
17. Squadrone V, Cocha M, Cerutti E, et al. Continuous positive airway pressure for treatment of postoperative hypoxemia: a randomized controlled trial. *JAMA* 2005;293(5):589-95. doi: 10.1001/jama.293.5.589 [published Online First: 2005/02/03]
18. Ricksten SE, Bengtsson A, Soderberg C, et al. Effects of periodic positive airway pressure by mask on postoperative pulmonary function. *Chest* 1986;89(6):774-81. [published Online First: 1986/06/01]
19. Lindner KH, Lotz P, Ahnefeld FW. Continuous positive airway pressure effect on functional residual capacity, vital capacity and its subdivisions. *Chest* 1987;92(1):66-70. [published Online First: 1987/07/01]
20. Patman S, Bartley A, Ferraz A, et al. Physiotherapy in upper abdominal surgery - what is current practice in Australia? *Arch Physiother* 2017;7:11. doi: 10.1186/s40945-017-0039-3 [published Online First: 2018/01/18]
21. Parke R, McGuinness S, Eccleston M. Nasal high-flow therapy delivers low level positive airway pressure. *Br J Anaesth* 2009;103(6):886-90. doi: 10.1093/bja/aep280 [published Online First: 2009/10/23]
22. Groves N, Tobin A. High flow nasal oxygen generates positive airway pressure in adult volunteers. *Aust Crit Care* 2007;20(4):126-31. doi: 10.1016/j.aucc.2007.08.001 [published Online First: 2007/10/13]
23. Corley A, Caruana LR, Barnett AG, et al. Oxygen delivery through high-flow nasal cannulae increase end-expiratory lung volume and reduce respiratory rate in post-cardiac surgical patients. *Br J Anaesth* 2011;107(6):998-1004. doi: 10.1093/bja/aer265 [published Online First: 2011/09/13]
24. Sztrymf B, Messika J, Bertrand F, et al. Beneficial effects of humidified high flow nasal oxygen in critical care patients: a prospective pilot study. *Intensive Care Med* 2011;37(11):1780-6. doi: 10.1007/s00134-011-2354-6 [published Online First: 2011/09/29]
25. Ashraf-Kashani N, Kumar R. High-flow nasal oxygen therapy. *Bja Education* 2017;17(2):57-62.
26. Maggiore SM, Idone FA, Vaschetto R, et al. Nasal high-flow versus Venturi mask oxygen therapy after extubation. Effects on oxygenation, comfort, and clinical outcome. *Am J Respir Crit Care Med* 2014;190(3):282-8. doi: 10.1164/rccm.201402-0364OC [published Online First: 2014/07/09]
27. Parke R, McGuinness S, Dixon R, et al. Open-label, phase II study of routine high-flow nasal oxygen therapy in cardiac surgical patients. *Br J Anaesth* 2013;111(6):925-31. doi: 10.1093/bja/aet262 [published Online First: 2013/08/08]
28. Frat JP, Thille AW, Mercat A, et al. High-flow oxygen through nasal cannula in acute hypoxemic respiratory failure. *N Engl J Med* 2015;372(23):2185-96. doi: 10.1056/NEJMoa1503326 [published Online First: 2015/05/20]
29. Stephan F, Barrucand B, Petit P, et al. High-Flow Nasal Oxygen vs Noninvasive Positive Airway Pressure in Hypoxemic Patients After Cardiothoracic Surgery: A Randomized Clinical Trial. *JAMA* 2015;313(23):2331-9. doi: 10.1001/jama.2015.5213 [published Online First: 2015/05/20]



- 1  
2  
3  
4 30. Futier E, Paugam-Burtz C, Godet T, et al. Effect of early postextubation high-flow nasal cannula vs  
5 conventional oxygen therapy on hypoxaemia in patients after major abdominal surgery: a  
6 French multicentre randomised controlled trial (OPERA). *Intensive Care Med*  
7 2016;42(12):1888-98. doi: 10.1007/s00134-016-4594-y [published Online First: 2016/10/25]  
8 31. Ramachandran SK, Nafiu OO, Ghaferi A, et al. Independent predictors and outcomes of  
9 unanticipated early postoperative tracheal intubation after nonemergent, noncardiac  
10 surgery. *Anesthesiology* 2011;115(1):44-53. doi: 10.1097/ALN.0b013e31821cf6de [published  
11 Online First: 2011/05/10]  
12 32. Craig DB. Postoperative recovery of pulmonary function. *Anesth Analg* 1981;60(1):46-52.  
13 [published Online First: 1981/01/01]  
14 33. Meyers JR, Lembeck L, O'Kane H, et al. Changes in functional residual capacity of the lung after  
15 operation. *Arch Surg* 1975;110(5):576-83. [published Online First: 1975/05/01]  
16 34. Clarke A. OPERA *The Bottom Line* 2017:www.thebottomline.org.uk/summaries/icm/opera.  
17 35. Papazian L, Corley A, Hess D, et al. Use of high-flow nasal cannula oxygenation in ICU adults: a  
18 narrative review. *Intensive Care Med* 2016;42(9):1336-49. doi: 10.1007/s00134-016-4277-8  
19 [published Online First: 2016/03/13]  
20 36. Spoletini G, Alotaibi M, Blasi F, et al. Heated Humidified High-Flow Nasal Oxygen in Adults:  
21 Mechanisms of Action and Clinical Implications. *Chest* 2015;148(1):253-61. doi:  
22 10.1378/chest.14-2871 [published Online First: 2015/03/06]  
23 37. Lee JH, Rehder KJ, Williford L, et al. Use of high flow nasal cannula in critically ill infants, children,  
24 and adults: a critical review of the literature. *Intensive Care Med* 2013;39(2):247-57. doi:  
25 10.1007/s00134-012-2743-5 [published Online First: 2012/11/13]  
26 38. Renda T, Corrado A, Iskandar G, et al. High-flow nasal oxygen therapy in intensive care and  
27 anaesthesia. *British Journal of Anaesthesia* 2018;120(1):18-27. doi:  
28 10.1016/j.bja.2017.11.010  
29 39. Lockstone J, Boden I, Denehy L, et al. Does early periodic non-invasive ventilation prevent  
30 respiratory complications following high-risk elective upper abdominal surgery? APA  
31 Conference 2017; Abstract Book: 143-144. www.apamomentum2017.asn.au/abstract/  
32 40. Millette BH, Athanassoglou, V., & Patel, A. High flow nasal oxygen therapy in adult anaesthesia.  
33 *Trends in Anaesthesia and Critical Care*, 2018(18):29-33.  
34 41. Huang HW, Sun XM, Shi ZH, et al. Effect of High-Flow Nasal Cannula Oxygen Therapy Versus  
35 Conventional Oxygen Therapy and Noninvasive Ventilation on Reintubation Rate in Adult  
36 Patients After Extubation: A Systematic Review and Meta-Analysis of Randomized Controlled  
37 Trials. *J Intensive Care Med* 2017;885066617705118. doi: 10.1177/0885066617705118  
38 [published Online First: 2017/04/22]  
39 42. Battisti A, Michotte JB, Tassaux D, et al. Non-invasive ventilation in the recovery room for  
40 postoperative respiratory failure: a feasibility study. *Swiss Med Wkly* 2005;135(23-24):339-  
41 43. doi: 2005/23/smw-10959 [published Online First: 2005/08/02]  
42 43. Chan AW, Tetzlaff JM, Altman DG, et al. SPIRIT 2013 statement: defining standard protocol items  
43 for clinical trials. *Ann Intern Med* 2013;158(3):200-7. doi: 10.7326/0003-4819-158-3-  
44 201302050-00583 [published Online First: 2013/01/09]  
45 44. Hoffmann TC, Glasziou PP, Boutron I, et al. Better reporting of interventions: template for  
46 intervention description and replication (TIDieR) checklist and guide. *BMJ* 2014;348:g1687.  
47 doi: 10.1136/bmj.g1687 [published Online First: 2014/03/13]  
48 45. Boden I, Browning L, Skinner EH, et al. The LIPPSMAck POP (Lung Infection Prevention Post  
49 Surgery - Major Abdominal - with Pre-Operative Physiotherapy) trial: study protocol for a  
50 multi-centre randomised controlled trial. *Trials* 2015;16:573. doi: 10.1186/s13063-015-1090-  
51 6 [published Online First: 2015/12/17]  
52 46. Boden I, Skinner EH, Browning L, et al. Preoperative physiotherapy for the prevention of  
53 respiratory complications after upper abdominal surgery: pragmatic, double blinded,  
54  
55  
56  
57  
58  
59

- 1  
2  
3 multicentre randomised controlled trial. *BMJ* 2018;360:j5916. doi: 10.1136/bmj.j5916  
4 [published Online First: 2018/01/26]  
5  
6 47. Brooks D, Parsons J, Newton J, et al. Discharge criteria from perioperative physical therapy. *Chest*  
7 2002;121(2):488-94. [published Online First: 2002/02/09]  
8  
9 48. Beasley R, Chien J, Douglas J, et al. Thoracic Society of Australia and New Zealand oxygen  
10 guidelines for acute oxygen use in adults: 'Swimming between the flags'. *Respirology*  
11 2015;20(8):1182-91. doi: 10.1111/resp.12620 [published Online First: 2015/10/22]  
12  
13 49. Agostini P, Naidu B, Cieslik H, et al. Comparison of recognition tools for postoperative pulmonary  
14 complications following thoracotomy. *Physiotherapy* 2011;97(4):278-83. doi:  
15 10.1016/j.physio.2010.11.007 [published Online First: 2011/11/05]  
16  
17 50. Sopena N, Sabria M, Neunos Study G. Multicenter study of hospital-acquired pneumonia in non-  
18 ICU patients. *Chest* 2005;127(1):213-9. doi: 10.1378/chest.127.1.213 [published Online First:  
19 2005/01/18]  
20  
21 51. Rabin R, de Charro F. EQ-5D: a measure of health status from the EuroQol Group. *Ann Med*  
22 2001;33(5):337-43. [published Online First: 2001/08/09]  
23  
24 52. Groll DL, To T, Bombardier C, et al. The development of a comorbidity index with physical  
25 function as the outcome. *J Clin Epidemiol* 2005;58(6):595-602. doi:  
26 10.1016/j.jclinepi.2004.10.018 [published Online First: 2005/05/10]  
27  
28 53. Rankin SL, Briffa TG, Morton AR, et al. A specific activity questionnaire to measure the functional  
29 capacity of cardiac patients. *Am J Cardiol* 1996;77(14):1220-3. [published Online First:  
30 1996/06/01]  
31  
32 54. Vather R, Trivedi S, Bissett I. Defining postoperative ileus: results of a systematic review and  
33 global survey. *J Gastrointest Surg* 2013;17(5):962-72. doi: 10.1007/s11605-013-2148-y  
34 [published Online First: 2013/02/05]  
35  
36 55. Glossop AJ, Shephard N, Bryden DC, et al. Non-invasive ventilation for weaning, avoiding  
37 reintubation after extubation and in the postoperative period: a meta-analysis. *Br J Anaesth*  
38 2012;109(3):305-14. doi: 10.1093/bja/aes270 [published Online First: 2012/08/11]  
39  
40 56. Bickenbach KA, Karanicolas PJ, Ammori JB, et al. Up and down or side to side? A systematic  
41 review and meta-analysis examining the impact of incision on outcomes after abdominal  
42 surgery. *Am J Surg* 2013;206(3):400-9. doi: 10.1016/j.amjsurg.2012.11.008 [published Online  
43 First: 2013/04/11]  
44  
45 57. Severgnini P, Selmo G, Lanza C, et al. Protective mechanical ventilation during general anesthesia  
46 for open abdominal surgery improves postoperative pulmonary function. *Anesthesiology*  
47 2013;118(6):1307-21. doi: 10.1097/ALN.0b013e31829102de [published Online First:  
48 2013/04/02]  
49  
50 58. Corcoran T, Rhodes JE, Clarke S, et al. Perioperative fluid management strategies in major  
51 surgery: a stratified meta-analysis. *Anesth Analg* 2012;114(3):640-51. doi:  
52 10.1213/ANE.0b013e318240d6eb [published Online First: 2012/01/19]  
53  
54 59. Nobili C, Marzano E, Oussoultzoglou E, et al. Multivariate analysis of risk factors for pulmonary  
55 complications after hepatic resection. *Ann Surg* 2012;255(3):540-50. doi:  
56 10.1097/SLA.0b013e3182485857 [published Online First: 2012/02/15]  
57  
58 60. Peyton PJ, Myles PS, Silbert BS, et al. Perioperative epidural analgesia and outcome after major  
59 abdominal surgery in high-risk patients. *Anesth Analg* 2003;96(2):548-, table of contents.  
60 [published Online First: 2003/01/23]  
61  
62 61. Waller HM, Connor SJ. Cumulative sum (Cusum) analysis provides an objective measure of  
63 competency during training in endoscopic retrograde cholangio-pancreatography (ERCP).  
64 *HPB (Oxford)* 2009;11(7):565-9. doi: 10.1111/j.1477-2574.2009.00091.x [published Online  
65 First: 2010/05/25]

**Table 1 Trial Registration Data Set for NIPPER PLUS trial**

| <b>Data Category</b>                                         | <b>Information</b>                                                                                                                                                                                                                                                                                                                                                                                                                                                                                                                                                                                                                                                                                                             |
|--------------------------------------------------------------|--------------------------------------------------------------------------------------------------------------------------------------------------------------------------------------------------------------------------------------------------------------------------------------------------------------------------------------------------------------------------------------------------------------------------------------------------------------------------------------------------------------------------------------------------------------------------------------------------------------------------------------------------------------------------------------------------------------------------------|
| Primary registry and trial identifying number                | Australian New Zealand Clinical Trials Registry number: ACTRN12617000269336                                                                                                                                                                                                                                                                                                                                                                                                                                                                                                                                                                                                                                                    |
| Date of registration in primary registry                     | 22/02/2017                                                                                                                                                                                                                                                                                                                                                                                                                                                                                                                                                                                                                                                                                                                     |
| Secondary identifying numbers                                | n/a                                                                                                                                                                                                                                                                                                                                                                                                                                                                                                                                                                                                                                                                                                                            |
| Trial protocol version                                       | This is Version 2 of the protocol and was enacted on February 2017                                                                                                                                                                                                                                                                                                                                                                                                                                                                                                                                                                                                                                                             |
| Source of monetary or material support                       | Clifford Craig Foundation (\$80,000 AUD)                                                                                                                                                                                                                                                                                                                                                                                                                                                                                                                                                                                                                                                                                       |
| Contact for public queries                                   | JL, jane.lockstone@ths.tas.gov.au                                                                                                                                                                                                                                                                                                                                                                                                                                                                                                                                                                                                                                                                                              |
| Contact for scientific queries                               | JL, jane.lockstone@ths.tas.gov.au                                                                                                                                                                                                                                                                                                                                                                                                                                                                                                                                                                                                                                                                                              |
| Public title                                                 | Does early postoperative non-invasive ventilation (NIV) prevent chest infections following high-risk elective abdominal surgery                                                                                                                                                                                                                                                                                                                                                                                                                                                                                                                                                                                                |
| Scientific title                                             | NIPPER-PLUS trial – Non-Invasive Positive airway Pressure therapy to Reduce Postoperative Lung Complications following Upper abdominal Surgery: a single centre pilot randomised control trial                                                                                                                                                                                                                                                                                                                                                                                                                                                                                                                                 |
| Countries of recruitment                                     | Australia                                                                                                                                                                                                                                                                                                                                                                                                                                                                                                                                                                                                                                                                                                                      |
| Health condition(s) or problem(s) studied<br>Intervention(s) | Pulmonary complications following high-risk elective upper abdominal surgery<br>Active comparator: Physiotherapy-led postoperative NIV therapy<br>Placebo comparator: high-flow nasal prong oxygen therapy                                                                                                                                                                                                                                                                                                                                                                                                                                                                                                                     |
| Key inclusion and exclusion criteria                         | <p>Ages eligible for study: <math>\geq 18</math> years<br/>Sexes eligible for study: both<br/>Accepts health volunteers: No</p> <p>Inclusion criteria: All adults undergoing high-risk elective open and/or advanced hand-assisted laparoscopic abdominal surgery.</p> <p>Exclusion criteria: 1. Any absolute contraindications for NIV in the period following surgery prior to the first NIV session; 2. Oesophageal surgery; 3. Obstructive sleep apnoea requiring CPAP overnight; 4 extreme claustrophobia; 5. not able to understand verbal instructions in English; 6. do not have capacity to give consent themselves; 7. a current hospital patient for a separate episode of care; 8. requiring organ transplant.</p> |
| Study type                                                   | Type: Investigator initiated, interventional, non-pharmacological, pilot study<br>Allocation: Concealed randomisation<br>Intervention model: parallel assignment<br>Masking: assessor blinding<br>Primary purpose: Prevention<br>Phase: Phase 2                                                                                                                                                                                                                                                                                                                                                                                                                                                                                |
| Date of first enrolment                                      | 23/02/2017                                                                                                                                                                                                                                                                                                                                                                                                                                                                                                                                                                                                                                                                                                                     |
| Target sample size                                           | Minimum 130                                                                                                                                                                                                                                                                                                                                                                                                                                                                                                                                                                                                                                                                                                                    |
| Recruitment status                                           | Recruiting                                                                                                                                                                                                                                                                                                                                                                                                                                                                                                                                                                                                                                                                                                                     |
| Primary Outcome                                              | Postoperative pulmonary complication during the first 14 postoperative days                                                                                                                                                                                                                                                                                                                                                                                                                                                                                                                                                                                                                                                    |
| Key secondary outcomes                                       | Recruitment ability, physiotherapy-led NIV and high-flow nasal oxygen therapy protocol adherence, safety of NIV therapy, associated costs of high-flow nasal oxygen therapy and a physiotherapy-led NIV service following upper abdominal surgery. In addition, this study will explore effects on incidence of pneumonia, intensive care unit (ICU) and hospital length of hospital, ICU readmission rates, incidence of reintubation, in-hospital, 30-day and 12-month all-cause mortality and health related quality of life.                                                                                                                                                                                               |

**Table 2 Contraindications and Adverse events relating to NIV therapy**

| Absolute Contraindications                                             | Relative Contraindications                                                    | Major Adverse Event                                                            | Transient physiological event                                                                                   |
|------------------------------------------------------------------------|-------------------------------------------------------------------------------|--------------------------------------------------------------------------------|-----------------------------------------------------------------------------------------------------------------|
| Cardiac or respiratory arrest                                          | Mildly decreased level of consciousness                                       | Anastomotic leak                                                               | hypotension, defined as a decrease in blood pressure >20mmHg determined by pre/post blood pressure observations |
| Severe agitation or encephalopathy                                     | Progressive severe respiratory failure as reported by the treating physician  | Severe hypotension requiring increase in medical management                    | decrease in SpO <sub>2</sub> oxygen saturations >10% from baseline or <85% for >60 seconds                      |
| Undrained pneumothorax or intraoperative pneumothorax with ICC in-situ | Uncooperative patient who can be calmed or comforted                          | cardiac or respiratory arrest                                                  | gastric distention as clinically reported by the treating surgeon                                               |
| Uncontrolled vomiting                                                  | SpO <sub>2</sub> falls below >10% below resting level of <85% for >60 seconds | Deterioration in medical condition requiring an increase in medical management | Vomiting during the NIV therapy                                                                                 |
| Inability to protect airway                                            | MAP < target pressure despite vasopressor                                     |                                                                                | Nasal bridge or facial erythema or ulceration                                                                   |
| Severe upper GI bleeding or haemoptysis                                | Resting HR <50 or >140 or new untreated arrhythmia develops                   |                                                                                |                                                                                                                 |
| Need for immediate intubation                                          | RR <5 or >40 b/min                                                            |                                                                                |                                                                                                                 |
| Facial trauma                                                          |                                                                               |                                                                                |                                                                                                                 |

*Abbreviations: HR, heart rate; ICC, intercostal catheter; MAP, Mean arterial pressure; NIV, non-invasive ventilation; RR, respiratory rate; SpO<sub>2</sub>, saturation of peripheral oxygen; Upper GI, Upper gastrointestinal; >, greater than; <, less than*

**Table 3 Early postoperative ambulation protocol<sup>46</sup>**

|                      |                                                        |
|----------------------|--------------------------------------------------------|
| Stage 1 (Safety)     | Sit over edge of bed/sit in chair minimum of 2 minutes |
| Stage 2 (Safety)     | March on spot 0-1 minute                               |
| Stage 3 (Ambulation) | March on spot/walk away from bedside 1-3 minutes       |
| Stage 4 (Ambulation) | March on spot/walk away from bedside 3 – 6 minutes     |
| Stage 5 (Ambulation) | Walk away from bedside 6 – 10 minutes                  |
| Stage 6 (Ambulation) | Walk away from bedside 10 – 15 minutes                 |
| Stage 7 (Ambulation) | Walk away from bedside > 15 minutes                    |

**PROTOCOL**

Provide assisted early ambulation as soon as possible on the first postoperative day.

At each session progress through each stage in sequence. Time achieved in the session is accumulative.

Aim to achieve rating of perceived exertion of greater than 3/10.

Aim to assist patient to ambulate more than 10 minutes (Stage 6 or greater).

Once patient able to ambulate past Stage 3, patient can be assisted to ambulate with a Physiotherapy Assistant, as long as safe to do as determined by the ward physiotherapist.

Interval training is permissible to obtain target walking time. Each interval of rest time must not exceed the preceding work time. Total session time is the accumulative work time.

Provide assisted early ambulation once a day until discharged according to the discharge scoring tool<sup>47</sup>

**Table 4 Postoperative pulmonary complications diagnostic tool: Melbourne Group Score Version 2<sup>45</sup>**

*Diagnosis confirmed when 4 or more of the following criteria are present anytime in the 24-hour period 00:01 to 24:00 on a single postoperative day:*

1. New abnormal breath sounds on auscultation different to preoperative assessment
2. Productive of yellow or green sputum different to preoperative assessment
3. Pulse oximetry oxygen saturation (SpO<sub>2</sub>) < 90% on room air on more than one consecutive postoperative day
4. Raised maximum oral temperature > 38°C on more than one consecutive day
5. An unexplained white cell count greater than 11 x10<sup>9</sup>/L
6. Presence of infection on sputum culture report
7. Chest radiograph (CXR) report of collapse/consolidation. Chest radiograph (CXR) report of collapse/consolidation. When a CXR has been taken but no report available, a ward medical officer, or a senior respiratory physiotherapist with more than 10 years' experience will be asked to report.
8. Physician's diagnosis of pneumonia, lower or upper respiratory tract infection, an undefined chest infection or prescription of an antibiotic for a respiratory infection

Figure 1 NIPPER PLUS participant timeline and schedule of events

|                       | TIMEPOINT                                                                                               | Enrolment                   | Allocation           |                |         | Post Allocation |              |        | Close out |  |
|-----------------------|---------------------------------------------------------------------------------------------------------|-----------------------------|----------------------|----------------|---------|-----------------|--------------|--------|-----------|--|
|                       |                                                                                                         | Listed for elective surgery | Pre-admission clinic | Day of surgery | POD 1-7 | POD 8-14        | Hospital D/C | POD 30 | 12 month  |  |
| <b>ENROLMENT:</b>     | <i>Enrolment</i>                                                                                        |                             | X                    |                |         |                 |              |        |           |  |
|                       | <i>Eligibility screen</i>                                                                               | X                           |                      |                |         |                 |              |        |           |  |
|                       | <i>Informed consent</i>                                                                                 |                             | X                    |                |         |                 |              |        |           |  |
|                       | <i>Random Allocation</i>                                                                                |                             |                      | X              |         |                 |              |        |           |  |
| <b>INTERVENTIONS:</b> | <i>Control; High-flow nasal oxygen therapy</i>                                                          |                             |                      | X              | X       |                 |              |        |           |  |
|                       | <i>Intervention: High-flow nasal oxygen therapy plus intermittent postoperative NIV</i>                 |                             |                      | X              | X       |                 |              |        |           |  |
| <b>VARIABLES:</b>     | <i>Demographics, medical history, HRQoL</i>                                                             |                             | X                    |                |         |                 |              |        |           |  |
|                       | <i>Intraoperative variables</i>                                                                         |                             |                      |                | X       |                 |              |        |           |  |
|                       | <i>Postoperative variables</i>                                                                          |                             |                      |                | X       | X               | X            |        |           |  |
| <b>OUTCOMES:</b>      | <i>PPC</i>                                                                                              |                             |                      |                | X       | X               |              |        |           |  |
|                       | <i>Recruitment ability, physiotherapy-led NIV and high-flow nasal oxygen therapy protocol adherence</i> |                             |                      |                | X       |                 |              |        |           |  |
|                       | <i>Major adverse events and/or transient physiological events of NIV</i>                                |                             |                      |                | X       |                 |              |        |           |  |
|                       | <i>Associated costs of physiotherapy-led NIV &amp; a high-flow nasal oxygen therapy service</i>         |                             |                      |                | X       | X               | X            |        |           |  |
|                       | <i>Pneumonia, Hospital and ICU LOS, ICU readmission and reintubation rates, in-hospital mortality</i>   |                             |                      |                | X       | X               | X            |        |           |  |
|                       | <i>HRQoL (EQ-5D-5L)</i>                                                                                 |                             |                      |                | X       | X               |              |        | X         |  |
|                       | <i>30-day and 12-month all-cause mortality</i>                                                          |                             |                      |                |         |                 |              | X      | X         |  |

Abbreviations: D/C; discharge, ICU; intensive care unit, LOS; length of stay, NIV; Non-invasive ventilation, POD; postoperative day, PPC; postoperative pulmonary complication, HRQoL; health-related quality of life

Figure 1 NIPPER PLUS participant timeline and schedule of events

279x361mm (300 x 300 DPI)

Figure 2 CONSORT flow diagram for the NIPPER PLUS study

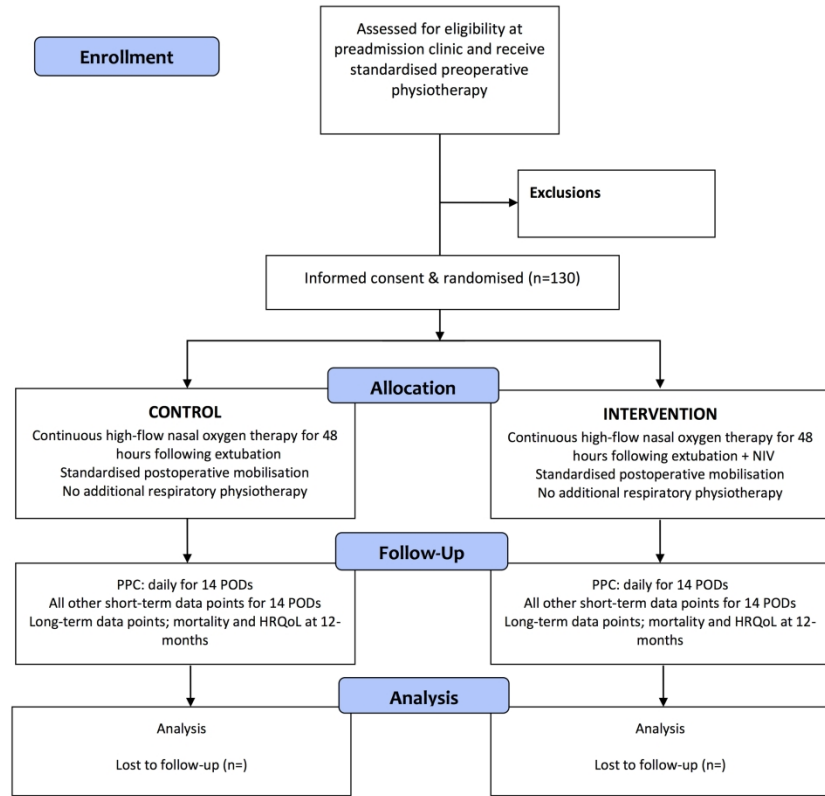

Abbreviations: NIV, non-invasive ventilation, PPC, postoperative pulmonary complication, POD; postoperative day, HRQoL; health-related quality of life

Figure 2 CONSORT flow diagram for the NIPPER PLUS study

279x361mm (300 x 300 DPI)



# Reporting checklist for protocol of a clinical trial.

Based on the SPIRIT guidelines.

## Instructions to authors

Complete this checklist by entering the page numbers from your manuscript where readers will find each of the items listed below.

Your article may not currently address all the items on the checklist. Please modify your text to include the missing information. If you are certain that an item does not apply, please write "n/a" and provide a short explanation.

Upload your completed checklist as an extra file when you submit to a journal.

In your methods section, say that you used the SPIRIT reporting guidelines, and cite them as:

Chan A-W, Tetzlaff JM, Altman DG, Laupacis A, Gøtzsche PC, Krleža-Jerić K, Hróbjartsson A, Mann H, Dickersin K, Berlin J, Doré C, Parulekar W, Summerskill W, Groves T, Schulz K, Sox H, Rockhold FW, Rennie D, Moher D. SPIRIT 2013 Statement: Defining standard protocol items for clinical trials. *Ann Intern Med.* 2013;158(3):200-207

|                                             |                     | Reporting Item                                                                                               | Page Number    |
|---------------------------------------------|---------------------|--------------------------------------------------------------------------------------------------------------|----------------|
| Title                                       | <a href="#">#1</a>  | Descriptive title identifying the study design, population, interventions, and, if applicable, trial acronym | 1              |
| Trial registration                          | <a href="#">#2a</a> | Trial identifier and registry name. If not yet registered, name of intended registry                         | 6              |
| Trial registration: data set                | <a href="#">#2b</a> | All items from the World Health Organization Trial Registration Data Set                                     | 25<br>(Table1) |
| Protocol version                            | <a href="#">#3</a>  | Date and version identifier                                                                                  | 25<br>(Table1) |
| Funding                                     | <a href="#">#4</a>  | Sources and types of financial, material, and other support                                                  | 20             |
| Roles and responsibilities: contributorship | <a href="#">#5a</a> | Names, affiliations, and roles of protocol contributors                                                      | 1              |
| Roles and                                   | <a href="#">#5b</a> | Name and contact information for the trial sponsor                                                           | N/A            |

|    |                      |                                                                   |      |
|----|----------------------|-------------------------------------------------------------------|------|
| 1  | responsibilities:    |                                                                   |      |
| 2  | sponsor contact      |                                                                   |      |
| 3  | information          |                                                                   |      |
| 4  |                      |                                                                   |      |
| 5  | Roles and            | <a href="#">#5c</a>                                               | 20   |
| 6  | responsibilities:    | Role of study sponsor and funders, if any, in study design;       |      |
| 7  | sponsor and funder   | collection, management, analysis, and interpretation of           |      |
| 8  |                      | data; writing of the report; and the decision to submit the       |      |
| 9  |                      | report for publication, including whether they will have          |      |
| 10 |                      | ultimate authority over any of these activities                   |      |
| 11 |                      |                                                                   |      |
| 12 |                      |                                                                   |      |
| 13 | Roles and            | <a href="#">#5d</a>                                               | 17   |
| 14 | responsibilities:    | Composition, roles, and responsibilities of the coordinating      |      |
| 15 | committees           | centre, steering committee, endpoint adjudication                 |      |
| 16 |                      | committee, data management team, and other individuals            |      |
| 17 |                      | or groups overseeing the trial, if applicable (see Item 21a       |      |
| 18 |                      | for data monitoring committee)                                    |      |
| 19 |                      |                                                                   |      |
| 20 |                      |                                                                   |      |
| 21 |                      |                                                                   |      |
| 22 | Background and       | <a href="#">#6a</a>                                               | 3-5  |
| 23 | rationale            | Description of research question and justification for            |      |
| 24 |                      | undertaking the trial, including summary of relevant studies      |      |
| 25 |                      | (published and unpublished) examining benefits and harms          |      |
| 26 |                      | for each intervention                                             |      |
| 27 |                      |                                                                   |      |
| 28 |                      |                                                                   |      |
| 29 | Background and       | <a href="#">#6b</a>                                               | 3-5  |
| 30 | rationale: choice of | Explanation for choice of comparators                             |      |
| 31 | comparators          |                                                                   |      |
| 32 |                      |                                                                   |      |
| 33 |                      |                                                                   |      |
| 34 | Objectives           | <a href="#">#7</a>                                                | 5    |
| 35 |                      | Specific objectives or hypotheses                                 |      |
| 36 |                      |                                                                   |      |
| 37 | Trial design         | <a href="#">#8</a>                                                | 6    |
| 38 |                      | Description of trial design including type of trial (eg, parallel |      |
| 39 |                      | group, crossover, factorial, single group), allocation ratio,     |      |
| 40 |                      | and framework (eg, superiority, equivalence, non-inferiority,     |      |
| 41 |                      | exploratory)                                                      |      |
| 42 |                      |                                                                   |      |
| 43 | Study setting        | <a href="#">#9</a>                                                | 6    |
| 44 |                      | Description of study settings (eg, community clinic,              |      |
| 45 |                      | academic hospital) and list of countries where data will be       |      |
| 46 |                      | collected. Reference to where list of study sites can be          |      |
| 47 |                      | obtained                                                          |      |
| 48 |                      |                                                                   |      |
| 49 |                      |                                                                   |      |
| 50 | Eligibility criteria | <a href="#">#10</a>                                               | 7    |
| 51 |                      | Inclusion and exclusion criteria for participants. If             |      |
| 52 |                      | applicable, eligibility criteria for study centres and            |      |
| 53 |                      | individuals who will perform the interventions (eg,               |      |
| 54 |                      | surgeons, psychotherapists)                                       |      |
| 55 |                      |                                                                   |      |
| 56 |                      |                                                                   |      |
| 57 | Interventions:       | <a href="#">#11a</a>                                              | 9-11 |
| 58 | description          | Interventions for each group with sufficient detail to allow      |      |
| 59 |                      | replication, including how and when they will be                  |      |
| 60 |                      |                                                                   |      |

administered

|    |                      |                      |                                                             |
|----|----------------------|----------------------|-------------------------------------------------------------|
| 1  |                      |                      |                                                             |
| 2  |                      |                      |                                                             |
| 3  | Interventions:       | <a href="#">#11b</a> | Criteria for discontinuing or modifying allocated           |
| 4  | modifications        |                      | interventions for a given trial participant (eg, drug dose  |
| 5  |                      |                      | change in response to harms, participant request, or        |
| 6  |                      |                      | improving / worsening disease)                              |
| 7  |                      |                      |                                                             |
| 8  |                      |                      |                                                             |
| 9  | Interventions:       | <a href="#">#11c</a> | Strategies to improve adherence to intervention protocols,  |
| 10 | adherence            |                      | and any procedures for monitoring adherence (eg, drug       |
| 11 |                      |                      | tablet return; laboratory tests)                            |
| 12 |                      |                      |                                                             |
| 13 |                      |                      |                                                             |
| 14 | Interventions:       | <a href="#">#11d</a> | Relevant concomitant care and interventions that are        |
| 15 | concomitant care     |                      | permitted or prohibited during the trial                    |
| 16 |                      |                      |                                                             |
| 17 |                      |                      |                                                             |
| 18 | Outcomes             | <a href="#">#12</a>  | Primary, secondary, and other outcomes, including the       |
| 19 |                      |                      | specific measurement variable (eg, systolic blood           |
| 20 |                      |                      | pressure), analysis metric (eg, change from baseline, final |
| 21 |                      |                      | value, time to event), method of aggregation (eg, median,   |
| 22 |                      |                      | proportion), and time point for each outcome. Explanation   |
| 23 |                      |                      | of the clinical relevance of chosen efficacy and harm       |
| 24 |                      |                      | outcomes is strongly recommended                            |
| 25 |                      |                      |                                                             |
| 26 |                      |                      |                                                             |
| 27 |                      |                      |                                                             |
| 28 |                      |                      |                                                             |
| 29 |                      |                      |                                                             |
| 30 | Participant timeline | <a href="#">#13</a>  | Time schedule of enrolment, interventions (including any    |
| 31 |                      |                      | run-ins and washouts), assessments, and visits for          |
| 32 |                      |                      | participants. A schematic diagram is highly recommended     |
| 33 |                      |                      | (see Figure)                                                |
| 34 |                      |                      |                                                             |
| 35 |                      |                      |                                                             |
| 36 | Sample size          | <a href="#">#14</a>  | Estimated number of participants needed to achieve study    |
| 37 |                      |                      | objectives and how it was determined, including clinical    |
| 38 |                      |                      | and statistical assumptions supporting any sample size      |
| 39 |                      |                      | calculations                                                |
| 40 |                      |                      |                                                             |
| 41 |                      |                      |                                                             |
| 42 |                      |                      |                                                             |
| 43 | Recruitment          | <a href="#">#15</a>  | Strategies for achieving adequate participant enrolment to  |
| 44 |                      |                      | reach target sample size                                    |
| 45 |                      |                      |                                                             |
| 46 |                      |                      |                                                             |
| 47 | Allocation: sequence | <a href="#">#16a</a> | Method of generating the allocation sequence (eg,           |
| 48 | generation           |                      | computer-generated random numbers), and list of any         |
| 49 |                      |                      | factors for stratification. To reduce predictability of a   |
| 50 |                      |                      | random sequence, details of any planned restriction (eg,    |
| 51 |                      |                      | blocking) should be provided in a separate document that    |
| 52 |                      |                      | is unavailable to those who enrol participants or assign    |
| 53 |                      |                      | interventions                                               |
| 54 |                      |                      |                                                             |
| 55 |                      |                      |                                                             |
| 56 |                      |                      |                                                             |
| 57 |                      |                      |                                                             |
| 58 | Allocation           | <a href="#">#16b</a> | Mechanism of implementing the allocation sequence (eg,      |
| 59 |                      |                      |                                                             |
| 60 |                      |                      |                                                             |

|                                                                      |                                                |                      |                                                                                                                                                                                                                                                                                                                                                                                                              |          |
|----------------------------------------------------------------------|------------------------------------------------|----------------------|--------------------------------------------------------------------------------------------------------------------------------------------------------------------------------------------------------------------------------------------------------------------------------------------------------------------------------------------------------------------------------------------------------------|----------|
| 1<br>2<br>3<br>4                                                     | concealment<br>mechanism                       |                      | central telephone; sequentially numbered, opaque, sealed envelopes), describing any steps to conceal the sequence until interventions are assigned                                                                                                                                                                                                                                                           |          |
| 5<br>6<br>7<br>8<br>9                                                | Allocation:<br>implementation                  | <a href="#">#16c</a> | Who will generate the allocation sequence, who will enrol participants, and who will assign participants to interventions                                                                                                                                                                                                                                                                                    | 7-8      |
| 10<br>11<br>12<br>13<br>14<br>15                                     | Blinding (masking)                             | <a href="#">#17a</a> | Who will be blinded after assignment to interventions (eg, trial participants, care providers, outcome assessors, data analysts), and how                                                                                                                                                                                                                                                                    | 13       |
| 16<br>17<br>18<br>19<br>20                                           | Blinding (masking):<br>emergency<br>unblinding | <a href="#">#17b</a> | If blinded, circumstances under which unblinding is permissible, and procedure for revealing a participant's allocated intervention during the trial                                                                                                                                                                                                                                                         | 13       |
| 21<br>22<br>23<br>24<br>25<br>26<br>27<br>28<br>29<br>30<br>31<br>32 | Data collection plan                           | <a href="#">#18a</a> | Plans for assessment and collection of outcome, baseline, and other trial data, including any related processes to promote data quality (eg, duplicate measurements, training of assessors) and a description of study instruments (eg, questionnaires, laboratory tests) along with their reliability and validity, if known. Reference to where data collection forms can be found, if not in the protocol | 14,15,16 |
| 33<br>34<br>35<br>36<br>37<br>38                                     | Data collection plan:<br>retention             | <a href="#">#18b</a> | Plans to promote participant retention and complete follow-up, including list of any outcome data to be collected for participants who discontinue or deviate from intervention protocols                                                                                                                                                                                                                    | 12, 16   |
| 39<br>40<br>41<br>42<br>43<br>44<br>45<br>46<br>47                   | Data management                                | <a href="#">#19</a>  | Plans for data entry, coding, security, and storage, including any related processes to promote data quality (eg, double data entry; range checks for data values). Reference to where details of data management procedures can be found, if not in the protocol                                                                                                                                            | 16       |
| 48<br>49<br>50<br>51<br>52                                           | Statistics: outcomes                           | <a href="#">#20a</a> | Statistical methods for analysing primary and secondary outcomes. Reference to where other details of the statistical analysis plan can be found, if not in the protocol                                                                                                                                                                                                                                     | 16-17    |
| 53<br>54<br>55<br>56                                                 | Statistics: additional<br>analyses             | <a href="#">#20b</a> | Methods for any additional analyses (eg, subgroup and adjusted analyses)                                                                                                                                                                                                                                                                                                                                     | 16-17    |
| 57<br>58<br>59<br>60                                                 | Statistics: analysis<br>population and         | <a href="#">#20c</a> | Definition of analysis population relating to protocol non-adherence (eg, as randomised analysis), and any statistical                                                                                                                                                                                                                                                                                       | 16-17    |

|    |                    |                      |                                                                 |       |
|----|--------------------|----------------------|-----------------------------------------------------------------|-------|
| 1  | missing data       |                      | methods to handle missing data (eg, multiple imputation)        |       |
| 2  | Data monitoring:   | <a href="#">#21a</a> | Composition of data monitoring committee (DMC);                 | 17-18 |
| 3  | formal committee   |                      | summary of its role and reporting structure; statement of       |       |
| 4  |                    |                      | whether it is independent from the sponsor and competing        |       |
| 5  |                    |                      | interests; and reference to where further details about its     |       |
| 6  |                    |                      | charter can be found, if not in the protocol. Alternatively, an |       |
| 7  |                    |                      | explanation of why a DMC is not needed                          |       |
| 8  |                    |                      |                                                                 |       |
| 9  |                    |                      |                                                                 |       |
| 10 |                    |                      |                                                                 |       |
| 11 |                    |                      |                                                                 |       |
| 12 | Data monitoring:   | <a href="#">#21b</a> | Description of any interim analyses and stopping                | 17-18 |
| 13 | interim analysis   |                      | guidelines, including who will have access to these interim     |       |
| 14 |                    |                      | results and make the final decision to terminate the trial      |       |
| 15 |                    |                      |                                                                 |       |
| 16 |                    |                      |                                                                 |       |
| 17 | Harms              | <a href="#">#22</a>  | Plans for collecting, assessing, reporting, and managing        | 17-18 |
| 18 |                    |                      | solicited and spontaneously reported adverse events and         |       |
| 19 |                    |                      | other unintended effects of trial interventions or trial        |       |
| 20 |                    |                      | conduct                                                         |       |
| 21 |                    |                      |                                                                 |       |
| 22 |                    |                      |                                                                 |       |
| 23 |                    |                      |                                                                 |       |
| 24 | Auditing           | <a href="#">#23</a>  | Frequency and procedures for auditing trial conduct, if any,    | N/A   |
| 25 |                    |                      | and whether the process will be independent from                |       |
| 26 |                    |                      | investigators and the sponsor                                   |       |
| 27 |                    |                      |                                                                 |       |
| 28 |                    |                      |                                                                 |       |
| 29 |                    |                      |                                                                 |       |
| 30 | Research ethics    | <a href="#">#24</a>  | Plans for seeking research ethics committee / institutional     | 20    |
| 31 | approval           |                      | review board (REC / IRB) approval                               |       |
| 32 |                    |                      |                                                                 |       |
| 33 |                    |                      |                                                                 |       |
| 34 | Protocol           | <a href="#">#25</a>  | Plans for communicating important protocol modifications        | N/A   |
| 35 | amendments         |                      | (eg, changes to eligibility criteria, outcomes, analyses) to    |       |
| 36 |                    |                      | relevant parties (eg, investigators, REC / IRBs, trial          |       |
| 37 |                    |                      | participants, trial registries, journals, regulators)           |       |
| 38 |                    |                      |                                                                 |       |
| 39 |                    |                      |                                                                 |       |
| 40 | Consent or assent  | <a href="#">#26a</a> | Who will obtain informed consent or assent from potential       | 6-7   |
| 41 |                    |                      | trial participants or authorised surrogates, and how (see       |       |
| 42 |                    |                      | Item 32)                                                        |       |
| 43 |                    |                      |                                                                 |       |
| 44 |                    |                      |                                                                 |       |
| 45 |                    |                      |                                                                 |       |
| 46 | Consent or assent: | <a href="#">#26b</a> | Additional consent provisions for collection and use of         | N/A   |
| 47 | ancillary studies  |                      | participant data and biological specimens in ancillary          |       |
| 48 |                    |                      | studies, if applicable                                          |       |
| 49 |                    |                      |                                                                 |       |
| 50 |                    |                      |                                                                 |       |
| 51 | Confidentiality    | <a href="#">#27</a>  | How personal information about potential and enrolled           | 16    |
| 52 |                    |                      | participants will be collected, shared, and maintained in       |       |
| 53 |                    |                      | order to protect confidentiality before, during, and after the  |       |
| 54 |                    |                      | trial                                                           |       |
| 55 |                    |                      |                                                                 |       |
| 56 |                    |                      |                                                                 |       |
| 57 |                    |                      |                                                                 |       |
| 58 | Declaration of     | <a href="#">#28</a>  | Financial and other competing interests for principal           | 20    |
| 59 |                    |                      |                                                                 |       |
| 60 |                    |                      |                                                                 |       |

|    |                       |                      |                                                                 |        |
|----|-----------------------|----------------------|-----------------------------------------------------------------|--------|
| 1  | interests             |                      | investigators for the overall trial and each study site         |        |
| 2  |                       |                      |                                                                 |        |
| 3  | Data access           | <a href="#">#29</a>  | Statement of who will have access to the final trial dataset,   | 16     |
| 4  |                       |                      | and disclosure of contractual agreements that limit such        |        |
| 5  |                       |                      | access for investigators                                        |        |
| 6  |                       |                      |                                                                 |        |
| 7  |                       |                      |                                                                 |        |
| 8  | Ancillary and post    | <a href="#">#30</a>  | Provisions, if any, for ancillary and post-trial care, and for  | N/A    |
| 9  | trial care            |                      | compensation to those who suffer harm from trial                |        |
| 10 |                       |                      | participation                                                   |        |
| 11 |                       |                      |                                                                 |        |
| 12 |                       |                      |                                                                 |        |
| 13 | Dissemination policy: | <a href="#">#31a</a> | Plans for investigators and sponsor to communicate trial        | 16, 18 |
| 14 | trial results         |                      | results to participants, healthcare professionals, the public,  |        |
| 15 |                       |                      | and other relevant groups (eg, via publication, reporting in    |        |
| 16 |                       |                      | results databases, or other data sharing arrangements),         |        |
| 17 |                       |                      | including any publication restrictions                          |        |
| 18 |                       |                      |                                                                 |        |
| 19 |                       |                      |                                                                 |        |
| 20 |                       |                      |                                                                 |        |
| 21 | Dissemination policy: | <a href="#">#31b</a> | Authorship eligibility guidelines and any intended use of       | N/A    |
| 22 | authorship            |                      | professional writers                                            |        |
| 23 |                       |                      |                                                                 |        |
| 24 |                       |                      |                                                                 |        |
| 25 | Dissemination policy: | <a href="#">#31c</a> | Plans, if any, for granting public access to the full protocol, | 16     |
| 26 | reproducible          |                      | participant-level dataset, and statistical code                 |        |
| 27 | research              |                      |                                                                 |        |
| 28 |                       |                      |                                                                 |        |
| 29 |                       |                      |                                                                 |        |
| 30 | Informed consent      | <a href="#">#32</a>  | Model consent form and other related documentation given        | 6      |
| 31 | materials             |                      | to participants and authorised surrogates                       |        |
| 32 |                       |                      |                                                                 |        |
| 33 |                       |                      |                                                                 |        |
| 34 | Biological specimens  | <a href="#">#33</a>  | Plans for collection, laboratory evaluation, and storage of     | N/A    |
| 35 |                       |                      | biological specimens for genetic or molecular analysis in       |        |
| 36 |                       |                      | the current trial and for future use in ancillary studies, if   |        |
| 37 |                       |                      | applicable                                                      |        |
| 38 |                       |                      |                                                                 |        |
| 39 |                       |                      |                                                                 |        |
| 40 |                       |                      |                                                                 |        |

41 The SPIRIT checklist is distributed under the terms of the Creative Commons Attribution License CC-  
 42 BY-ND 3.0. This checklist can be completed online using <https://www.goodreports.org/>, a tool made  
 43 by the [EQUATOR Network](#) in collaboration with [Penelope.ai](#)  
 44  
 45  
 46  
 47  
 48  
 49  
 50  
 51  
 52  
 53  
 54  
 55  
 56  
 57  
 58  
 59  
 60

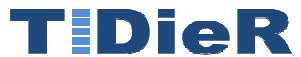

Template for Intervention Description and Replication

The TIDieR (Template for Intervention Description and Replication) Checklist\*:

Information to include when describing an intervention and the location of the information

| Item number | Item                                                                                                                                                                                                      | Where located **                        |                   |
|-------------|-----------------------------------------------------------------------------------------------------------------------------------------------------------------------------------------------------------|-----------------------------------------|-------------------|
|             |                                                                                                                                                                                                           | Primary paper (page or appendix number) | Other † (details) |
|             | <b>BRIEF NAME</b>                                                                                                                                                                                         |                                         |                   |
| 1.          | Provide the name or a phrase that describes the intervention.                                                                                                                                             | <u>Page 3-4</u>                         | _____             |
|             | <b>WHY</b>                                                                                                                                                                                                |                                         |                   |
| 2.          | Describe any rationale, theory, or goal of the elements essential to the intervention.                                                                                                                    | <u>Page 3-5</u>                         | _____             |
|             | <b>WHAT</b>                                                                                                                                                                                               |                                         |                   |
| 3.          | Materials: Describe any physical or informational materials used in the intervention, including those provided to participants or used in intervention delivery or in training of intervention providers. | <u>Page 10-11</u>                       | _____             |
|             | Provide information on where the materials can be accessed (e.g. online appendix, URL).                                                                                                                   |                                         |                   |
| 4.          | Procedures: Describe each of the procedures, activities, and/or processes used in the intervention, including any enabling or support activities.                                                         | <u>Page 9-11</u>                        | _____             |
|             | <b>WHO PROVIDED</b>                                                                                                                                                                                       |                                         |                   |
| 5.          | For each category of intervention provider (e.g. psychologist, nursing assistant), describe their expertise, background and any specific training given.                                                  | <u>Page 11</u>                          | _____             |
|             | <b>HOW</b>                                                                                                                                                                                                |                                         |                   |
| 6.          | Describe the modes of delivery (e.g. face-to-face or by some other mechanism, such as internet or telephone) of the intervention and whether it was provided individually or in a group.                  | <u>Page 9-10</u>                        | _____             |
|             | <b>WHERE</b>                                                                                                                                                                                              |                                         |                   |
| 7.          | Describe the type(s) of location(s) where the intervention occurred, including any necessary infrastructure or relevant features.                                                                         | <u>Page 9-10</u>                        | _____             |

TIDieR checklist

|                          |                                                                                                                                                                                   |                   |
|--------------------------|-----------------------------------------------------------------------------------------------------------------------------------------------------------------------------------|-------------------|
| <b>WHEN and HOW MUCH</b> |                                                                                                                                                                                   |                   |
| 8.                       | Describe the number of times the intervention was delivered and over what period of time including the number of sessions, their schedule, and their duration, intensity or dose. | <u>Page 9 -11</u> |
| <b>TAILORING</b>         |                                                                                                                                                                                   |                   |
| 9.                       | If the intervention was planned to be personalised, titrated or adapted, then describe what, why, when, and how.                                                                  | <u>Page 9-11</u>  |
| <b>MODIFICATIONS</b>     |                                                                                                                                                                                   |                   |
| 10.†                     | If the intervention was modified during the course of the study, describe the changes (what, why, when, and how).                                                                 | <u>N/A</u>        |
| <b>HOW WELL</b>          |                                                                                                                                                                                   |                   |
| 11.                      | Planned: If intervention adherence or fidelity was assessed, describe how and by whom, and if any strategies were used to maintain or improve fidelity, describe them.            | <u>N/A</u>        |
| 12.‡                     | Actual: If intervention adherence or fidelity was assessed, describe the extent to which the intervention was delivered as planned.                                               | <u>N/A</u>        |

\*\* **Authors** - use N/A if an item is not applicable for the intervention being described. **Reviewers** – use ‘?’ if information about the element is not reported/not sufficiently reported.

† If the information is not provided in the primary paper, give details of where this information is available. This may include locations such as a published protocol or other published papers (provide citation details) or a website (provide the URL).

‡ If completing the TIDieR checklist for a protocol, these items are not relevant to the protocol and cannot be described until the study is complete.

\* We strongly recommend using this checklist in conjunction with the TIDieR guide (see *BMJ* 2014;348:g1687) which contains an explanation and elaboration for each item.

\* The focus of TIDieR is on reporting details of the intervention elements (and where relevant, comparison elements) of a study. Other elements and methodological features of studies are covered by other reporting statements and checklists and have not been duplicated as part of the TIDieR checklist. When a **randomised trial** is being reported, the TIDieR checklist should be used in conjunction with the CONSORT statement (see [www.consort-statement.org](http://www.consort-statement.org)) as an extension of **Item 5 of the CONSORT 2010 Statement**. When a **clinical trial protocol** is being reported, the TIDieR checklist should be used in conjunction with the SPIRIT statement as an extension of **Item 11 of the SPIRIT 2013 Statement** (see [www.spirit-statement.org](http://www.spirit-statement.org)). For alternate study designs, TIDieR can be used in conjunction with the appropriate checklist for that study design (see [www.equator-network.org](http://www.equator-network.org)).

TIDieR checklist



# BMJ Open

## Non-Invasive Positive airway Pressure thErapy to Reduce Postoperative Lung complications following Upper abdominal Surgery (NIPPER PLUS): Protocol for a single centre pilot randomised control trial

|                                 |                                                                                                                                                                                                                                                                                                                                                                                                                                                                                                                                                                                                                                                                           |
|---------------------------------|---------------------------------------------------------------------------------------------------------------------------------------------------------------------------------------------------------------------------------------------------------------------------------------------------------------------------------------------------------------------------------------------------------------------------------------------------------------------------------------------------------------------------------------------------------------------------------------------------------------------------------------------------------------------------|
| Journal:                        | <i>BMJ Open</i>                                                                                                                                                                                                                                                                                                                                                                                                                                                                                                                                                                                                                                                           |
| Manuscript ID                   | bmjopen-2018-023139.R1                                                                                                                                                                                                                                                                                                                                                                                                                                                                                                                                                                                                                                                    |
| Article Type:                   | Protocol                                                                                                                                                                                                                                                                                                                                                                                                                                                                                                                                                                                                                                                                  |
| Date Submitted by the Author:   | 18-Aug-2018                                                                                                                                                                                                                                                                                                                                                                                                                                                                                                                                                                                                                                                               |
| Complete List of Authors:       | Lockstone, Jane; Launceston General Hospital, Department of Physiotherapy; The University of Melbourne, Physiotherapy, School of Health Sciences<br>Boden, Ianthe; Launceston General Hospital, Department of Physiotherapy; The University of Melbourne, Physiotherapy, School of Health Sciences<br>Robertson, Iain; University of Tasmania, School of Health Sciences<br>Story, David; The University of Melbourne , Perioperative and Pain Medicine Unit, Melbourne Medical School<br>Denehy, Linda; The University of Melbourne, Physiotherapy, School of Health Sciences<br>Parry, Selina M.; The University of Melbourne, Physiotherapy, School of Health Sciences |
| <b>Primary Subject Heading</b>: | Surgery                                                                                                                                                                                                                                                                                                                                                                                                                                                                                                                                                                                                                                                                   |
| Secondary Subject Heading:      | Intensive care                                                                                                                                                                                                                                                                                                                                                                                                                                                                                                                                                                                                                                                            |
| Keywords:                       | Adult surgery < SURGERY, Adult intensive & critical care < INTENSIVE & CRITICAL CARE, Adult anaesthesia < ANAESTHETICS                                                                                                                                                                                                                                                                                                                                                                                                                                                                                                                                                    |
|                                 |                                                                                                                                                                                                                                                                                                                                                                                                                                                                                                                                                                                                                                                                           |

SCHOLARONE™  
Manuscripts

**Study title**

Non-Invasive Positive airway Pressure thErapy to Reduce Postoperative Lung complications following Upper abdominal Surgery (NIPPER PLUS): Protocol for a single centre pilot randomised control trial

**Author names and institutional affiliations**

1. Jane Lockstone, Department of Physiotherapy, Launceston General Hospital, Launceston, TAS, 7250, Australia and, Department of Physiotherapy, The University of Melbourne, Melbourne, VIC, 3052, Australia
2. Ianthe Boden, Department of Physiotherapy, Launceston General Hospital, Launceston, TAS, 7250, Australia and, Department of Physiotherapy, The University of Melbourne, Melbourne, VIC, 3052, Australia
3. Iain K Robertson, Clifford Craig Foundation, Launceston General Hospital, Launceston, TAS, Australia; and, School of Health Sciences, University of Tasmania, Launceston, TAS, 7250, Australia
4. David Story, Perioperative and Pain Medicine Unit, Melbourne Medical School, The University of Melbourne, Melbourne, VIC, 3052, Australia
5. Linda Denehy, Department of Physiotherapy, The University of Melbourne, Melbourne, VIC, 3052, Australia
6. Selina M. Parry, Department of Physiotherapy, The University of Melbourne, Melbourne, VIC, 3052, Australia

**Corresponding author contact details**

Name: Jane Lockstone  
Address: Department of Physiotherapy, Launceston General Hospital, 274-280 Charles St, Launceston TAS 7250, Australia  
Tel: +61 427995761  
Email: [jane.lockstone@ths.tas.gov.au](mailto:jane.lockstone@ths.tas.gov.au)

**Word count: 6534**

## ABSTRACT

**Introduction:** Postoperative pulmonary complications (PPC) are a common serious complication following upper abdominal surgery leading to significant consequences including increased mortality, hospital costs and prolonged hospitalisation. The primary objective of this study is to detect whether there is a possible signal towards PPC reduction with the use of additional intermittent non-invasive ventilation (NIV) compared to continuous high-flow nasal oxygen therapy alone following high-risk elective upper abdominal surgery. Secondary objectives are to measure feasibility of; (1) trial conduct and design, and (2) physiotherapy-led NIV and a high-flow nasal oxygen therapy protocol, safety of NIV and to provide preliminary costs of care information of NIV and high-flow nasal oxygen therapy. **Methods and analysis:** This is a single centre, parallel group, assessor blinded, pilot randomised trial, with 130 high-risk upper abdominal surgery patients randomly assigned via concealed allocation to either (1) usual care of continuous high-flow nasal oxygen therapy for 48 hours following extubation or, (2) usual care plus five additional 30-minute physiotherapy-led NIV sessions within the first two postoperative days. Both groups receive standardised preoperative physiotherapy and postoperative early ambulation. No additional respiratory physiotherapy is provided to either group. Outcome measures will assess incidence of PPC within the first 14 postoperative days, recruitment ability, physiotherapy-led NIV and high-flow nasal oxygen therapy protocol adherence, adverse events relating to NIV delivery and costs of providing a physiotherapy-led NIV and a high-flow nasal oxygen therapy service following upper abdominal surgery. **Ethics and dissemination:** Ethics approval has been obtained from the relevant institution and results will be published to inform future multicentre trials.

**Trial registration number:** ACTRN12617000269336.

**Key words:** general surgery, non-invasive ventilation, postoperative care, postoperative complications

### Article Summary

Strengths and limitations of this study

- This pilot study is a 130-patient parallel group randomised clinical trial of additional early intermittent postoperative NIV versus continuous high-flow nasal oxygen therapy alone.
- This trial is measuring recruitment ability and feasibility of providing physiotherapy-led NIV and a high-flow nasal oxygen therapy protocol.
- This trial standardises physiotherapy and postoperative ambulation.
- This is a pilot, single centre study unlikely to be powered to determine treatment effectiveness.
- Results of this pilot study will assist the design and conduct of future definitive multicentre trials.

## INTRODUCTION

Postoperative pulmonary complications (PPC) are a common serious complication following upper abdominal surgery with a reported incidence of 13-42%<sup>1-6</sup>. Development of a PPC is strongly associated with increased postoperative mortality, morbidity and prolonged hospitalisation<sup>2,3,7</sup>.

There are well-reported pathophysiological effects of anaesthesia and upper abdominal surgery on the respiratory system including prolonged lung volume reductions, diaphragm dysfunction, alveolar collapse and reduced mucociliary clearance<sup>8,9</sup>. The combination of which establishes a pathological environment for bacterial growth and impaired pulmonary gas exchange, which can lead to postoperative respiratory failure and/or pneumonia<sup>10,11</sup>.

Following surgery, respiratory optimisation and support is warranted to avoid respiratory failure and subsequent reintubation<sup>12</sup>. Conventional low-flow oxygen therapy is commonly administered via nasal cannula or a face mask to supplement oxygenation yet may not be effective to compensate for loss of lung volume<sup>13</sup>. Whilst oxygen support alone may be sufficient for low-risk patients in the postoperative period, increased attention to patients at high-risk of PPC development to provide additional therapies that aim to increase postoperative lung volumes may be warranted.

Non-Invasive ventilation (NIV) has been shown to reverse reduced lung volumes induced by anaesthesia and abdominal surgery<sup>11</sup>. During NIV the positive airway pressure throughout the breath cycle may re-open atelectatic alveoli, increase lung volume and improve gas exchange<sup>11</sup>.

Postoperative NIV has been reported to reduce PPC by half, with a further significant sub-group effect specifically for preventing pneumonia<sup>14-17</sup> following upper abdominal surgery. Whilst the optimal preventative NIV intervention dosage parameters are currently undetermined, the timing of postoperative NIV initiation is argued to have an important influence on its effectiveness with earlier application of NIV thought to lead to more successful alveolar recruitment<sup>18-20</sup>. Despite relatively good evidence supporting the use of NIV in the early postoperative period to reduce PPC, the implementation of broad-scale routine prophylactic NIV use is currently unclear but appears to be limited<sup>4,21</sup>. The reasons for which are unknown yet likely multifactorial, including perceived risks, resources required and associated service costs. It is possible that newer modalities such as high-flow nasal oxygen therapy could be a viable and more feasible alternative than preventative NIV to reduce PPC.

High-flow nasal oxygen therapy delivers heated and humidified oxygen and/or air via nasal prongs at a prescribed accurate fraction of inspired oxygen (FiO<sub>2</sub>) and with a maximum flow rate of 60 litres per

1  
2  
3  
4 minute. This constant high gas flow at the nares creates a flow-dependent, low level of positive  
5  
6 airway pressure between 5 to 8cm H<sub>2</sub>O<sup>22,23</sup>. It is hypothesised that this low level of positive pressure  
7  
8 increases lung volumes and improves oxygenation<sup>24,25</sup> and may potentially decrease the incidence of  
9  
10 respiratory complications post extubation and surgery<sup>26</sup>. Compared with standard oxygen therapy,  
11  
12 high-flow nasal oxygen therapy reduces reintubation rates and desaturation episodes in critically ill  
13  
14 intensive care unit (ICU) patients with acute respiratory failure<sup>27</sup> and reduces the requirement for  
15  
16 escalation of respiratory support following cardiac surgery<sup>28</sup>. When compared to NIV, high-flow nasal  
17  
18 oxygen therapy provided to prevent intubation was superior in reducing 90-day mortality in patients  
19  
20 with acute respiratory failure in ICU<sup>29</sup>. Following cardiothoracic surgery, high-flow nasal oxygen  
21  
22 therapy demonstrated equivalence with NIV in reducing post-surgery reintubation in patients who  
23  
24 developed respiratory failure or were deemed at risk of respiratory failure following post-surgical  
25  
26 extubation<sup>30</sup>.

27  
28 Following major abdominal surgery, it is possible that high-flow nasal oxygen therapy may assist in  
29  
30 preventing PPCs. It could be just as effective as NIV and potentially more feasible in terms of  
31  
32 resources required and service costs. This has yet to be established as all previous NIV clinical trials<sup>14</sup>  
33  
34 <sup>17</sup> investigating the prevention of PPC following abdominal surgery have compared NIV to standard  
35  
36 oxygen therapy alone, never to high-flow nasal oxygen therapy. A recent large multicentre  
37  
38 randomised control trial (RCT) (OPERA trial)<sup>31</sup> demonstrated no benefit in preventing hypoxemia  
39  
40 following major abdominal surgery with the use of preventative high-flow nasal oxygen therapy  
41  
42 compared to standard oxygen therapy. Participants were provided with high-flow nasal oxygen  
43  
44 therapy postoperatively for a median duration of 15 [IQR 12-18] hours following extubation<sup>31</sup>. As  
45  
46 postoperative respiratory failure commonly occurs within 72 hours after surgery<sup>32</sup> and functional  
47  
48 residual capacity is shown to reach its lowest value one to two days following upper abdominal  
49  
50 surgery<sup>33-35</sup> it may be that high-flow nasal oxygen therapy needs to be prescribed for a longer  
51  
52 duration to be clinically effective in preventing PPCs in the postoperative period. It has been  
53  
54 recommended that the utility of postoperative high-flow nasal oxygen therapy in high-risk patients  
55  
56 when used for longer durations be explored<sup>36</sup>.

57  
58 Due to the growing exploratory evidence supporting the theoretical and proposed clinical benefits of  
59  
60 high-flow nasal oxygen therapy<sup>37,38</sup>, clinical uptake has increased<sup>39</sup> and the application of high-flow  
nasal oxygen therapy is becoming widespread in intensive care units (ICU)<sup>40</sup> including at our own  
institution<sup>41</sup> and also in other clinical settings including the ward<sup>42</sup>. Given this increasing use of high-  
flow nasal oxygen therapy yet uncertainty regarding the preventative properties, increased

1  
2  
3 reported patient comfort/tolerance compared to NIV<sup>43</sup> and unknown comparative costs of providing  
4 a NIV and/or high-flow nasal oxygen therapy service to high-risk upper abdominal surgery patients,  
5 this study is designed to detect whether there is a possible signal towards reduction in PPC with the  
6 use of intermittent NIV in addition to continuous high-flow oxygen therapy in the first 48 hours after  
7 surgery and measure the feasibility of providing these interventions. This study is also designed to  
8 understand the associated costs of service delivery for both these therapies. These findings will  
9 assist in designing and conducting future multicentre trials.  
10  
11  
12  
13  
14  
15

### 16 **Pilot work**

17 Prior to commencing this pilot RCT, we undertook an observational study to test the feasibility and  
18 safety of intermittent physiotherapy-led NIV following high-risk elective upper abdominal surgery<sup>41</sup>.  
19 Whilst physiotherapy-led NIV was able to be delivered within 24 hours following surgery and was  
20 shown to be safe in both ICU and ward patients<sup>41</sup>, the main barrier identified to early postoperative  
21 NIV was physiotherapy-service related limitations<sup>41</sup>. Due to lengthy surgeries, a large proportion of  
22 patients did not return to the ward or ICU until after our hospital's standard physiotherapy working  
23 hours. These patients missed receiving the planned initial NIV dose within the target four hours. On  
24 average, our patients received their first NIV session at 18 hours post-surgery. To mitigate this  
25 problem, we implemented a flexible-hour physiotherapy NIV service in the immediate post-  
26 anaesthesia care unit (PACU), also known as the recovery room. Providing NIV in the PACU has been  
27 reported to be feasible and safe<sup>44</sup>.  
28  
29  
30  
31  
32  
33  
34  
35

### 36 **Objectives**

37 This project is a pilot RCT with the aim of planning a future definitive multicentre RCT to compare  
38 the use of additional intermittent physiotherapy-led NIV to continuous high-flow nasal oxygen  
39 therapy alone following elective high-risk upper abdominal surgery to reduce PPC incidence. The  
40 primary objective of this pilot study is to detect whether there is a possible signal towards PPC  
41 reduction with additional NIV compared to high-flow nasal oxygen therapy. Secondary objectives are  
42 to measure the feasibility of; (1) trial conduct and design and (2) physiotherapy-led NIV and a high-  
43 flow nasal oxygen therapy protocol, safety of NIV therapy and to provide preliminary costs of care  
44 information on NIV and high-flow nasal oxygen therapy following upper abdominal surgery. In  
45 addition, this trial will also explore possible effects on post-surgical ICU and hospital length of stay  
46 (LOS), unplanned ICU admission at any time-point during the acute post-surgical stay, incidence of  
47 reintubation, in-hospital, 30-day and 12-month all-cause mortality and health related quality of life  
48 (HRQoL). As this study is a pilot there is no formal hypothesis.  
49  
50  
51  
52  
53  
54  
55  
56  
57  
58  
59  
60

## METHODS

### Design

The Non-Invasive Positive airway Pressure therapy to Reduce Postoperative Lung complications following Upper abdominal Surgery (NIPPER PLUS) trial is a prospective, single centre, assessor blinded, parallel group, pilot randomised control trial, with patients randomly assigned via concealed allocation to either usual care (continuous high-flow nasal oxygen therapy for the first 48 hours after surgery and early standardised mobilisation) or intervention (usual care plus five 30-minute NIV sessions). Figure 1 outlines the schedule of enrolment, interventions and assessments.

Randomisation is stratified to planned post-surgical destination (ward or high dependency unit (HDU)/ICU). See Figure 2 for a CONSORT diagram of the NIPPER PLUS trial and Table 1 for an overview of the trial methods and design. The methods are reported in accordance with the Standard Protocol Items; Recommendations for Interventional Trials<sup>45</sup> (SPIRIT) guidelines for clinical trials and the Template for Intervention Description and Replication<sup>46</sup> (TIDieR) reporting of interventions.

### Patient and Public Involvement

There was no involvement from patients or the public in the development or the design of this trial.

### Setting

The NIPPER PLUS trial is being undertaken at a large regional primary referral publically funded hospital in Australia. The Tasmanian Health Human Research Ethics Committee approved this study (protocol reference H0016207). This study was prospectively registered on 22<sup>nd</sup> February 2017 prior to start of study commencement with the Australian New Zealand Clinical Trials Registry (ACTRN12617000269336).

### Participants and enrolment

All patients having major surgery at our hospital are required to attend a pre-admission assessment clinic within six weeks of surgery. At this clinic, any patient listed for elective major abdominal surgery receives respiratory physiotherapy education on the prevention of PPC and breathing exercise training<sup>47</sup>. For the NIPPER PLUS trial, all patients are screened by the preoperative physiotherapist using the Melbourne Risk Prediction Tool (MRPT)<sup>6</sup> to determine if they are at high-risk of developing a PPC. These patients, and any patient with a planned postoperative admission to ICU or HDU, are invited by the preoperative physiotherapist to participate in the trial. Eligible patients are provided with a verbal explanation of the trial and provision of written and pictorial

1  
2  
3 information. Consenting patients are required to sign a written consent form. Where the  
4 preoperative physiotherapist or the eligible patient is unable to attend the preadmission clinic, the  
5 patient is contacted by telephone and invited to enter the trial. The consent form is then signed  
6 during their hospital admission. Participant recruitment began in March 2017 and aims to be  
7 completed by August 2018, with final follow up to be August 2019.  
8  
9

## 10 11 12 **Eligibility Criteria**

### 13 14 **Inclusions**

15  
16 Eligible participants are patients meeting the following criteria:

- 17 1. Adults ( $\geq 18$  years) undergoing elective upper abdominal surgery, able to understand verbal  
18 instructions in English and provide informed consent;
- 19 2. Open and/or hand-assisted laparoscopic upper abdominal surgery with an abdominal  
20 incision longer than 5 cm that is above, or extending above the umbilicus;
- 21 3. At high-risk of PPC defined in hierarchal order; 1. A planned postsurgical admission to  
22 ICU/HDU, 2. Identified at high-risk using the Melbourne Risk Prediction Tool (MRPT)<sup>6</sup>.  
23  
24  
25  
26  
27

### 28 29 **Exclusions**

30  
31 The following exclusion criteria apply:

- 32 1. Pre-existing obstructive sleep apnoea where overnight continuous positive airway pressure  
33 is required
- 34 2. Extreme claustrophobia and inability to tolerate use of a NIV facemask
- 35 3. Current hospital patient for a separate episode of care
- 36 4. Patients requiring oesophageal surgery or organ transplant
- 37 5. Any absolute contraindications for NIV in the period following surgery prior to first NIV  
38 session (Table 2)  
39  
40  
41  
42  
43  
44  
45

### 46 47 **Randomisation and Allocation**

48  
49 A research assistant independent to the trial pre-prepared 130 sequentially numbered (1-130)  
50 opaque envelopes each containing an allocation card wrapped in aluminium foil. Allocation  
51 sequence is generated by a web-based computer program (<http://www.randomizer.org/>). Random  
52 allocation is stratified to planned postsurgical destination (ICU and Ward). One of the aims of this  
53 study is the feasibility of high-flow nasal oxygen therapy and NIV application. The ease of application  
54  
55  
56  
57  
58  
59



1  
2  
3  
4 could be biased towards it being more or less feasible in one location over another. Stratification  
5 ensures that there will be equal representation of participants at both locations. At our centre,  
6 historical data finds that approximately 70% of high-risk upper abdominal surgery patients have a  
7 planned postoperative ICU admission. To manage this difference in location distribution, the total  
8 sample size of 130 is divided into two blocks with 90 in the ICU block and 40 in the Ward block. The  
9 allocation sequence in each block is then determined in a 1:1 ratio, control and  
10  
11 intervention. Following construction of the randomisation envelopes the allocation sequence is  
12  
13 locked securely in the hospital's research institute and unavailable to site investigators, those who  
14  
15 enrol participants and/or assign interventions.  
16  
17

18  
19 If it arises that the ratio of eligible ward or ICU patients is different than previously ascertained this  
20 will mean that one of the blocks (two blocks stratified to location: ICU or ward) of envelopes will  
21 become exhausted prior to completion of the trial. If this occurs the next available envelope for the  
22 other intended postoperative location (ICU or ward), regardless of the actual postoperative location,  
23 will be opened in sequence and so on until the minimum target sample of 130 is met. If the situation  
24 occurs where the minimum sample is achieved prior to the completion of the funded time period  
25 (see sample size section), a block of non-stratified allocation opaque sealed envelopes will be  
26 constructed by an independent administration assistant using the same web-based computer  
27 randomisation program at a 1:1 ratio (control:intervention) in a single block of 15, and then  
28 repeated as necessary until trial completion.  
29  
30  
31  
32  
33  
34

35 Entry into the trial is finalised at the end of the surgical procedure where the post-surgical  
36 destination is confirmed and exclusion criteria assessed. Eligible consenting patients are then  
37 randomised into the trial by the lead or a site investigator only by opening the next sequentially  
38 numbered sealed opaque envelope according to the patient's planned postsurgical destination  
39 (ward or ICU/HDU). Once opened, participant's details are written on the envelope to ensure that  
40 patients were randomised in presenting order and these are filed securely along with the signed  
41 consent form. If a patient is identified as ineligible following surgery completion, they will not be  
42 randomised nor entered into the trial. Participants are randomly assigned to receive either i)  
43 continuous high-flow nasal oxygen therapy for 48 hours following extubation (control group) or ii)  
44 continuous high-flow nasal oxygen therapy for 48 hours following extubation plus five 30 minute  
45 sessions of NIV implemented by a physiotherapist over the first two postoperative days  
46 (intervention group).  
47  
48  
49  
50  
51  
52  
53

#### 54 55 **Interventions**

56  
57  
58  
59  
60

### Control Group (Usual Care)

All participants receive preoperative respiratory physiotherapy education and training<sup>47</sup>. Postoperatively, an early ambulation program is provided as per a standardised protocol<sup>48</sup> of once daily physiotherapy-directed assisted ambulation (Table 3). Participants are provided with early ambulation until a threshold score is met using a criteria-lead scoring tool<sup>49</sup>, or until discharged from hospital, whichever occurs first. If a participant is referred for a mobility review, progression of gait aid or a stairs assessment following discharge from physiotherapy, the participant will be treated at the discretion of the ward physiotherapist and this occasion of service recorded. Following surgery, no respiratory physiotherapy is provided to either group unless the participant develops the primary endpoint - a PPC, physiotherapy will then be provided at the discretion of the attending physiotherapist. The type of treatment/s provided will be documented.

On the day of surgery, a site investigator documents high-flow nasal oxygen therapy orders on each consenting patient's post-anaesthetic observation chart to instruct theatre nursing staff to initiate high-flow nasal oxygen therapy as soon as possible following extubation. These orders specify that the FiO<sub>2</sub> is to be titrated to achieve a saturation of peripheral oxygen (SpO<sub>2</sub>) between 92 -96%<sup>50</sup> unless otherwise specified by the attending anaesthetist/ICU consultant. Gas flow rate is set at 50 litres per minute. If a participant is unable to tolerate this flow rate, it can be reduced to a minimum of 30 litres per minute. High-flow nasal oxygen therapy is to be provided continuously for 48 hours from the time of extubation. Changes to flow rate and any removal of high-flow nasal oxygen therapy for more than 15 minutes during the 48-hour period are recorded.

All other aspects of perioperative patient care, including the type of anaesthesia, postoperative analgesia, surgical techniques, and postoperative clinical care are provided at the discretion of the anaesthesia and surgical teams and according to routine clinical practice at our centre.

Pragmatically, there will be no attempt to standardise perioperative management or intraoperative ventilation strategies for this study. Our hospital is currently not recognised as an enhanced recovery after surgery (ERAS) site however some individual anaesthesia and surgical teams within our hospital adhere to ERAS principles.

### Intervention Group

Care is provided as per the control group above, with the exception of five, 30-minute<sup>11</sup> NIV sessions delivered by a physiotherapist over the first two postoperative days in addition to high-flow nasal oxygen therapy. The initial NIV dose is delivered within four hours of extubation, followed by twice

1  
2  
3 daily sessions on postoperative day one and two. This service is provided in the PACU, ICU/HDU, or  
4 the surgical ward depending on the participant's location at the time of NIV delivery.  
5  
6

7 Prior to commencing each NIV session all participants are assessed for absolute contraindications for  
8 NIV therapy by the treating physiotherapist (Table 2). The NIV sessions are delivered using a ResMed  
9 VPAP™ machine (ResMed Ltd, Oxfordshire, UK) with a humidified circuit and standard facemask.  
10 This is delivered with participants either sitting up in bed with the bed head raised between 45 – 90  
11 degrees or with the participant sitting out of bed in a high back chair. Expiratory positive airway  
12 pressure (EPAP) is set at 10cmH<sub>2</sub>O<sup>11</sup>. Inspiratory positive airway pressure (IPAP) is initially set at  
13 15cmH<sub>2</sub>O and adjusted as required to achieve tidal volumes of at least 6-8mls/kg. Participants with  
14 BMI > 30 have a starting EPAP set at 12cmH<sub>2</sub>O and a starting IPAP set at 16cmH<sub>2</sub>O. Deviations from  
15 these planned settings are reported and documented. The difference between IPAP and EPAP  
16 (known as pressure support ventilation; PSV) is maintained at a minimum of 4cmH<sub>2</sub>O and the  
17 maximum total pressure (PSV + EPAP) will be no greater than 25cmH<sub>2</sub>O<sup>11</sup>.  
18  
19  
20  
21  
22  
23  
24  
25

26 If a participant is unable to tolerate the set pressures, reassurance is firstly given to the participant  
27 and the following modifications taken in sequential order, until patient tolerance is achieved:  
28  
29

- 30 1. Reduce EPAP to 8cmH<sub>2</sub>O (set minimum)
- 31 2. Reduce IPAP to 12cmH<sub>2</sub>O (set minimum) in decrements of 1cmH<sub>2</sub>O

32 If the participant remains unable to tolerate the therapy despite pressure titration and reassurance,  
33 cessation of NIV therapy will occur and be reported. Pressure rise time is set at the slowest speed  
34 (900ms) and the inspiratory trigger is set to the minimum value. Air-leaks are managed by fitting the  
35 correct sized mask carefully using the mask measure guide provided by ResMed with focus on  
36 minimising leaks around the nasogastric tube if present. The ResMed VPAP™ compensates for air  
37 leaks up to 40 litres per minute. Above this a 'high-leak' alarm sounds and the machine is unable to  
38 deliver the set pressure. Any high-leak alarm is monitored, recorded and the mask readjusted  
39 accordingly. Ideally the duration of NIV is to be 30 minutes of continuous therapy, however if NIV  
40 therapy needs to be temporarily stopped, therapy time will cease and reason documented. Once  
41 therapy is re-started, timing will recommence. If a participant is unable to continue with NIV therapy  
42 within 5 minutes of temporarily ceasing, the session is terminated and the reason documented.  
43 Supplemental oxygen is titrated through the ResMed VPAP™ as required to achieve SpO<sub>2</sub> 92-96%  
44 unless otherwise specified by the medical team. During each NIV session participants have their  
45 high-flow nasal oxygen therapy removed for the duration of NIV therapy and replaced once therapy  
46 is finished. The treating physiotherapist continuously monitors all participants for the duration of the  
47  
48  
49  
50  
51  
52  
53  
54  
55  
56  
57  
58  
59  
60

1  
2  
3 NIV therapy and re-assesses 30-minutes post intervention. Data including; blood pressure, heart  
4 rate, respiratory rate and SpO<sub>2</sub> is recorded pre, immediately post and 30-minutes after each NIV  
5 session. Any reason resulting in early cessation of NIV intervention or being unable to provide NIV  
6 therapy is reported.  
7  
8  
9

10  
11 All physiotherapists providing the intervention attend NIV training with the ICU Senior  
12 Physiotherapist who has 11 years' experience in NIV application. The training session includes  
13 familiarisation with the ResMed VPAP™ machine, set-up of equipment, detailed explanation of the  
14 intervention protocol and trouble-shooting. The physiotherapists are provided with a training  
15 manual and a copy of this manual is also kept with the ResMed VPAP™ to allow reference at any  
16 point during the intervention. The training manual consists of all the information provided in the  
17 training session. The years of hospital experience of each participating physiotherapist is reported.  
18  
19  
20  
21  
22

### 23 **Withdrawal from trial**

24  
25  
26 Participants are withdrawn for i) requiring longer than 48 hours of mechanical ventilation following  
27 surgery, or ii) withdrawal of consent. All withdrawals are reported.  
28  
29

### 30 **Outcomes**

31  
32 To detect a possible signal towards PPC reduction with the use of NIV in addition to continuous high-  
33 flow oxygen therapy in the first 48 hours after surgery, the primary outcome measure is the  
34 development of a PPC within the first 14 postoperative days or hospital discharge whichever occurs  
35 first. Using the Melbourne Group Scale (MGS) diagnostic Tool Version 2<sup>48</sup> (Table 4) a PPC is  
36 diagnosed when four or more of eight screening criteria are present in a 24-hour day. The MGS tool  
37 is valid and reliable<sup>51</sup>, is sensitive to therapeutic interventions designed to ameliorate postoperative  
38 atelectasis and alveolar de-recruitment<sup>48</sup>, and widely utilised in upper abdominal surgery trials<sup>4-6 48</sup>.  
39 An assessor blinded to group allocation, who has no clinical involvement with the study assesses  
40 participants prospectively and daily for a PPC until the seventh postoperative day. Thereafter,  
41 additional PPC assessments are only performed if clinically indicated when there are signs of  
42 respiratory deterioration reported in the medical record until postoperative day 14 or hospital  
43 discharge, whichever occurs first. To reduce the potential for missing data, retrospective collection  
44 of PPC data from the daily medical record will occur when a participant or assessor is unavailable for  
45 PPC assessment. Participants scoring three out of the possible eight factors are assessed twice daily  
46 to monitor for any further clinical deterioration. A blinded senior physiotherapist confirms a positive  
47 diagnosis of a PPC.  
48  
49  
50  
51  
52  
53  
54  
55  
56  
57  
58  
59  
60

### Feasibility measures of trial conduct, design and protocol

- 1) Consent and recruitment ability. Consent rate is anticipated to be  $\geq 90\%$  with recruitment of one to two patients per week.
- 2) Protocol adherence of physiotherapy-led NIV therapy. Successful physiotherapy-led NIV implementation is set at  $\leq 20\%$  protocol deviations. This is measured and reported by;
  - a. Proportion of intervention participants who receive the first NIV session within four hours of surgical- extubation.
  - b. Proportion of intervention participants who receive five, 30-minute NIV sessions in the first two postoperative days.
  - c. Reasons why NIV therapy could not be delivered or were ceased early.
- 3) Protocol adherence of high-flow nasal oxygen therapy. Successful high-flow nasal oxygen therapy implementation is set at  $< 20\%$  protocol deviations. This is measured and reported by;
  - a. Proportion of participants who receive high-flow nasal oxygen therapy for 48 continuous hours following surgical-extubation.
  - b. Time in minutes from extubation following surgery to commencement of high-flow nasal oxygen therapy.
  - c. Reasons why high-flow nasal oxygen therapy cannot be delivered or sustained.
- 4) Safety of NIV therapy measured by; (i) major adverse events relating to NIV therapy defined as; anastomotic leak suspected and confirmed; severe hypotension requiring an increase in medical management; cardiac and/or respiratory arrest; deterioration in medical condition requiring an increase in medical management and (ii) any transient physiological events during or immediately following NIV intervention (Table 2).
- 5) Costs of a high-flow nasal oxygen therapy and physiotherapy-led NIV therapy service measured by; costs of equipment (NIV masks, high-flow and NIV circuits, cleaning and machine service costs); physiotherapy time (in hours) attributed to delivering the NIV therapy and costs of an ICU and hospital stay measured by average cost of a bed day.

### Secondary exploratory outcomes

- 1) Incidence of Pneumonia<sup>52</sup> defined as new CXR infiltrates with at least two of: temp >38 °C, SOB, cough and purulent sputum, altered respiratory auscultation and WCC >12,000/ml or leukopenia (<3000/ml), within the first 14 postoperative hospital days or hospital discharge whichever occurs first.
- 2) Incidence of systemic inflammatory response syndrome (SIRS) as defined by 2 or more of the following: temp >38 or <36; HR>90; RR>20, or PCO<sub>2</sub><32, or ventilation for acute process; WCC>12 or <4, within the first 14 postoperative hospital days or hospital discharge whichever occurs first.
- 3) Incidence of sepsis, defined as a Sequential Organ Failure Assessment (SOFA) score ≥ 2, within the first 14 postoperative hospital days or hospital discharge whichever occurs first.
- 4) Post-surgical ICU and hospital length of stay (LOS) in days.
- 5) Unplanned ICU admission at any time-point during the acute post-surgical stay.
- 6) Incidence of reintubation at any time-point during the acute post-surgical stay.
- 7) In-hospital mortality, 30-day and 12-month mortality.
- 8) Health Related Quality of Life (HRQoL) using the EQ-5D-5L<sup>53</sup> preoperatively, postoperative day seven and day 14 and at 12-months postoperatively.

### Blinding

Random allocation occurs following completion of surgery. This ensures pre-admission and operating theatre medical, nursing, and physiotherapy staff are masked to postoperative group assignment. Postoperatively, PPC assessors are independent of routine postoperative clinical care and masked to group allocation. All physiotherapy documentation relating to the NIV intervention is documented and filed separately to ensure PPC assessors remain blinded for the first seven postoperative days and then added to the patient's medical file. If a treatment group participant informs the PPC assessor of their group allocation this is noted and reported. Due to the nature of intervention, postoperative ward staff including nurses, doctors and treating physiotherapists are unable to be blinded.

## Data collection

### Preoperative variables

To measure baseline characteristics the following variables are collected directly from the participant or the medical record: age (years), gender, height (cm), weight (kg), body mass index ( $\text{kg}/\text{cm}^2$ ), planned surgical procedure, surgical category and reason for the procedure, physical health status according to the American Society of Anaesthesiologists (ASA) and rated by the attending anaesthetist at the PAC (score 1 to 5), smoking history (non-smoker, current smoker or ex-smoker having ceased more than 8 weeks preoperatively), smoking pack years (1 pack year = 20 cigarettes per day for 1 year), years since smoking cessation, respiratory status including auscultation signs and  $\text{SpO}_2$  (%) on room air, cough strength and presence of sputum, participant-reported history of a chest infection in the previous two weeks, functional co-morbidity index<sup>54</sup>, participant-reported estimated maximum metabolic equivalent physical activity using a self-rated physical Specific Activity Questionnaire<sup>55</sup> and any limiting factor to ambulation.

### Intraoperative variables

The following variables are collected from the anaesthetic record, operation report and medical record: duration of anaesthesia (in minutes) during surgery; mechanical ventilation parameters including mode of ventilation, level of pressure/volume control, positive end expiratory pressure used and any recruitment manoeuvres performed; average  $\text{FiO}_2$  during surgery; type and amount of intraoperative fluid delivered ( $\text{ml}/\text{kg}/\text{h}$ ); number and type of blood transfusion units; incision type.

### Postoperative variables

Postoperative data is collected daily for the first 14 days or until hospital discharge, whichever occurs first for the following variables: time in days from the preoperative physiotherapy session to the operation; location (ICU or surgical ward) and duration in days at each location; duration of analgesia and type (epidural, constant opioid infusion, patient controlled analgesia, patient controlled epidural analgesia, oral, local pain infusion, or other); unplanned ICU admission and ICU LOS; hospital LOS; hours of mechanical ventilation; days of vasopressor use; days and types of oxygen therapy use; total days of nasogastric tube; day and diagnosis of a prolonged postoperative ileus using a standardised criteria<sup>56</sup> of 2 or more of the following factors in a 24-hour period including nausea/vomiting, inability to tolerate normal diet, absence of flatus, abdominal distension, radiologic confirmation, and physician diagnosis of ileus. Postoperative NIV parameters are collected including, time in hours from extubation following surgery to the first NIV session; time each NIV

1  
2  
3 session is delivered and the grade/seniority of the treating physiotherapist providing the NIV;  
4 position of the patient during NIV; duration in minutes of each NIV session; IPAP and EPAP used;  
5 pressure titration – reasons if pressure titration occurs and the pressures used; number of times NIV  
6 has to temporarily ceased prior to the planned 30-minute session; reasons NIV was unable to be  
7 delivered to the participant; any major adverse or transient physiological event which occurs as a  
8 direct result of NIV therapy. Postoperative high-flow nasal oxygen therapy parameters are collected  
9 including; time in minutes from extubation following surgery onto high-flow nasal oxygen therapy;  
10 time and date high-flow nasal oxygen therapy is removed; duration in hours of high-flow nasal  
11 oxygen therapy within the first 48 postoperative hours; number of times high-flow nasal oxygen  
12 therapy is removed for greater than 15 minutes within the first two postoperative days; average  
13 flow rate during the first two postoperative days; average FiO<sub>2</sub> during the first two postoperative  
14 days; reasons a participant is unable to have postoperative high-flow nasal oxygen therapy for the  
15 first two postoperative days. Early ambulation parameters are collected including: time in hours  
16 from end of surgery until time to ambulation >1 min; postoperative day walked longer than 10 min;  
17 maximum rating of perceived exertion during ambulation at each session; maximum ambulation  
18 stage attained at each session and reasons for a participant being unable to participate in an  
19 ambulation session.  
20  
21  
22  
23  
24  
25  
26  
27  
28  
29

### 30 31 **Sample Size**

32  
33 This RCT is a pilot trial that has been funded to be conducted for a defined time period (18 months).  
34 Current surgical throughput of eligible patients at our hospital predicts that we will recruit a sample  
35 of 130 eligible participants (65 per group) in the trial period. If this sample is not reached within the  
36 funded time period, recruitment will continue until a minimum sample of 130 is met. If this sample is  
37 reached prior to the designated funding period (18 months), recruitment will continue past 130,  
38 until this time period is completed. A baseline PPC rate of 18% for the control group (high-flow nasal  
39 oxygen therapy alone) is anticipated based on historical LIPPSMAck POP<sup>48</sup> data (n=101) of matched  
40 high-risk elective upper abdominal surgery participants who were given the same standardised pre-  
41 and postoperative physiotherapy as planned in NIPPER PLUS.  
42  
43  
44  
45  
46  
47

48 Previous systematic reviews in NIV to prevent pneumonia following surgery report a relative risk  
49 reduction of approximately 60%<sup>14 57</sup>. Using inference for proportion calculations for two independent  
50 samples; a total sample of 130 (2 groups of 65) would detect a 50% relative risk reduction in PPC  
51 between groups (favouring the NIV group, one-sided alpha at 0.05) with only 44% power. This  
52 sample will only be adequately powered (80%) if there is a large 75% relative risk reduction in PPC  
53 with the application of NIV (18% down to 4%).  
54  
55  
56  
57  
58  
59  
60



1  
2  
3 Assuming that NIV is superior to high-flow nasal oxygen therapy, an adequately powered study  
4 would need a sample of at least 450 (relative risk reduction 50% from a baseline of 18%, alpha two-  
5 sided 0.05, beta 80%) which would require a multicentre approach. However, there is also the  
6 possibility that high-flow nasal oxygen therapy is just as effective as NIV to prevent PPC. This would  
7 require a non-inferiority trial and would require a much larger sample.  
8  
9

10  
11 This pilot study aims to measure the feasibility of the intervention protocol and provide a baseline  
12 estimate of effect to assist in determining the design (superiority or non-inferiority) and conduct of a  
13 future multicentre RCT.  
14  
15

### 16 17 **Methods: Data collection, management and analysis**

18  
19 Data is collected from participants using a standardised electronic case report form and stored on a  
20 password protected electronic hard drive. Research assistants and site investigators responsible for  
21 data collection are trained directly by the principal investigator to ensure correct data handling. Any  
22 data or participant lost to follow-up will be reported. Once each participant's data set is completed,  
23 it is de-identified, entered into a main database, locked, and maintained securely by the principal  
24 investigator. All data, consent forms and relevant correspondence are stored according to Australian  
25 privacy laws and archived for a minimum of 12 years. On completion of the trial, the database will be  
26 made available for independent analysis or as an appendix in the publishing journal if requested.  
27  
28  
29  
30  
31

### 32 33 **Statistical methods**

34  
35 As our study is stratified to postoperative location (ICU/WARD) only, there is a possibility of  
36 significant baseline differences between groups. This will be managed according to the prognostic  
37 strength and size of imbalances due to potential confounding baseline variables between groups  
38 being assessed<sup>58</sup>. Adjustment covariates will be selected by backward stepwise regression from  
39 covariates that may have the potential for clinically significant alterations in effect sizes. These  
40 include: smoking history, age, length in time of operation, operation category (upper  
41 gastrointestinal, colorectal, urological, other), incision type and location<sup>59</sup>, intraoperative ventilation  
42 strategies<sup>3 60</sup>, fluid delivery<sup>61</sup>, blood transfusions<sup>62</sup>, and mode of post-operative analgesia<sup>63</sup>.  
43  
44  
45  
46  
47

48 The primary outcomes of absolute and relative rates of PPC in the trial groups will be estimated  
49 using multivariate robust random effects Poisson generalised linear modelling to allow assessment  
50 of binary outcomes with or without adjustment for potential confounding variables (incidence rates  
51 and rate ratios, 95 % confidence intervals, P-values). In addition, the effect of time from the end of  
52 surgery/anaesthesia to diagnosis of PPC will be compared using Cox proportional hazards regression  
53  
54  
55  
56  
57  
58  
59

1  
2  
3 with and without covariate adjustment (hazards ratio, 95 % confidence intervals, P-values). Graphic  
4 representation of this analysis will be performed using the Kaplan-Meier method.  
5  
6

7 Although this study is not adequately powered, a number of secondary outcomes will be treated as  
8 time-to-event analyses, with hazard ratios estimated using Cox proportional hazards regression: 1)  
9 The day of first diagnosis of other events will be recorded (pneumonia, SIRS, sepsis, reintubation,  
10 death); 2) Treatment group comparison for time from surgery to readiness for discharge, and to  
11 actual discharge (LOS), will be made using Cox proportional hazards regression, with successful  
12 discharge treated as censoring “failure” and death or no discharge within 30 days treated as  
13 censoring “non-failure”. Binomial secondary outcomes including unplanned ICU admission,  
14 unplanned reintubation will be analysed using mixed effects Poisson regression. Secondary  
15 outcomes with irregular distributions, including length of time periods (ICU and total post-operative  
16 LOS) and HRQoL, will be evaluated for group differences using mixed effects ordered logistic  
17 regression, with mean time (95 % CI) estimated for descriptive purposes using mixed effects linear  
18 regression. An intention-to-protocol sensitivity analysis will be performed by excluding from the  
19 analysis any participant who did not undergo the planned postoperative NIV intervention treatment.  
20 The sensitivity of the outcome estimates to missing data will be evaluated using multiple imputation.  
21 All analyses will be performed using Stata version 14 or later (StataCorp, College Station, TX, USA)  
22 and analysed on an intention-to-treat basis.  
23  
24  
25  
26  
27  
28  
29  
30  
31  
32

### 33 **Methods: Monitoring**

#### 34 **Data monitoring**

35  
36 The steering committee consists of the principal investigator, local investigator and two academic  
37 supervisors who contribute to the design and revision of this study protocol. The principal and local  
38 investigators are responsible for the study administrative management and daily co-ordination of  
39 the trial ensuring appropriate trial conduct, record keeping and data management.  
40  
41  
42

43  
44 An independent Data and Safety Monitoring Board (DSMB) monitors the ethics of the study in  
45 accordance with the Declaration of Helsinki overseeing safety and conduct of the study.  
46

47  
48 For the trial, there is a stopping rule for the potential of NIV or high-flow nasal oxygen therapy to be  
49 harmful. An unacceptable rate of anastomotic leakage of over 2.5% will trigger consideration for trial  
50 termination by the independent DSMB established for the oversight of this clinical trial. To detect a  
51 2.5% anastomotic leakage rate in either group requires a minimum of 57 patients (one-sample test  
52 of proportion compared to hypothetical 0.1% rate; power 80%; alpha 0.05). Analysis of anastomotic  
53  
54  
55  
56  
57  
58  
59  
60

1  
2  
3 leakage rates only in both groups will therefore be performed at participant recruitment number 60  
4 using cumulative summation analysis<sup>64</sup>.

5  
6  
7 Any other major adverse events directly relating to the interventions will be reported with oversight  
8 from the independent DSMB.  
9

## 10 **Ethics and Dissemination**

11  
12  
13 The Tasmanian Health Human Research Ethics Committee has granted ethical approval for this trial.  
14 Trial results will be disseminated widely through conference presentations and peer-review journal  
15 publications.  
16  
17

## 18 **DISCUSSION**

19  
20  
21 Consequences of PPCs following upper abdominal surgery are well defined, leading to great interest  
22 in their prevention. High-risk patients have been shown to be over eight times more likely to develop  
23 a PPC compared to individuals identified as low-risk<sup>6</sup> suggesting increased attention is required to  
24 improve postoperative outcomes in this high-risk cohort.  
25  
26  
27

28  
29  
30 Whilst previous clinical studies support the use of preventative NIV therapy following major  
31 abdominal surgery<sup>11 14 17</sup>, implementation of NIV therapy does not appear to be standard  
32 postoperative care<sup>4 21</sup> and a number of important methodological limitations exists in previous  
33 literature including high-bias risk and minimal reporting of adverse events<sup>14</sup>. Recommendations for  
34 future research include; evaluating the use of NIV in preventing mortality, a targeted approach  
35 investigating patients at higher risk for PPCs and must report on all adverse effects and possible  
36 complications of preventative postoperative NIV<sup>14 17</sup>. The NIPPER PLUS study is designed to begin  
37 targeting these recommendations by collecting and reporting on in-hospital, 30-day and 12-month  
38 all-cause mortality for all participants and is recruiting participants identified as high-risk of  
39 developing a PPC only. High-risk for this study has been defined as either; eligible patients with a  
40 planned postoperative admission to ICU/HDU due to this factor being independently associated with  
41 the development of a PPC<sup>6</sup> or eligible patients Identified at high risk using the MRPT<sup>6</sup>. The MRPT has  
42 been shown to be specific and sensitive in the identification of individuals who are at highest risk of  
43 PPC development in the surgical settings including upper abdominal surgery<sup>5 6</sup>.  
44  
45  
46  
47  
48  
49  
50  
51

52  
53 Preventative NIV was associated with no major complications in our observational study<sup>41</sup> and the  
54 NIPPER PLUS trial aims to further support this finding by reporting on any adverse event as well as  
55 transient physiological events directly relating to NIV therapy during, immediately following and 30-  
56  
57  
58  
59  
60

1  
2  
3 minutes after therapy, therefore contributing to necessary and strongly recommended NIV safety  
4 data for both ICU and ward patients.  
5  
6  
7

8 All previous preventative NIV clinical trials in abdominal surgery compare NIV to standard oxygen  
9 therapy only<sup>14 17</sup>, however the application of high-flow nasal oxygen therapy is becoming widespread  
10 in ICUs<sup>40</sup> and in other clinical settings<sup>26</sup>. The NIPPER PLUS study is designed with high-flow nasal  
11 oxygen therapy as standard care to match current clinical practice within our ICU unit and aims to  
12 detect whether there is a possible signal towards PPC reduction with the use of additional  
13 intermittent NIV compared to continuous high-flow oxygen therapy alone. The NIPPER PLUS trial is a  
14 single-centre study. The effect of high-flow nasal oxygen therapy in high-risk upper abdominal  
15 surgery patients is currently unclear. Prior to undertaking expensive fully powered multicentre trials  
16 there is a need to build evidence and data from pilot trials for realistic effect size variability  
17 estimation and to measure the design, feasibility, safety and potential challenges of treatment  
18 protocols. This pilot study aims to inform future definitive trial design and conduct. Interpretation of  
19 results will be evaluated in context of the studies limitations and indeed, it may be demonstrated  
20 that this protocol is unfeasible in its current form and would be futile to progress to multicentre  
21 trials without study and protocol re-design.  
22  
23  
24  
25  
26  
27  
28  
29  
30

31 In conclusion, the NIPPER PLUS trial is a single-centre, assessor-blinded, parallel group, pilot RCT,  
32 which aims to detect whether there is a possible signal towards PPC reduction with the use of  
33 additional intermittent NIV compared to continuous high-flow oxygen therapy alone following high-  
34 risk elective upper abdominal surgery. This trial is measuring recruitment ability, feasibility of  
35 implementing a physiotherapy-led NIV and high-flow nasal oxygen therapy protocol, safety of NIV  
36 therapy and preliminary costs of care information on a NIV and high-flow nasal oxygen therapy  
37 service. This will assist in the design and conduct of future multicentre trials. In addition, this trial  
38 will also explore possible effects on post-surgical ICU and hospital LOS, unplanned ICU admission,  
39 reintubation rates, in-hospital, 30-day and 12-month mortality. This trial standardises preoperative  
40 and postoperative physiotherapy care and is currently recruiting.  
41  
42  
43  
44  
45  
46  
47  
48  
49  
50  
51  
52  
53  
54  
55  
56  
57  
58  
59  
60

### **Acknowledgements**

We would like to thank all staff in the intensive care unit, the surgical ward, the post anaesthesia care unit and pre-admission clinic at Launceston General Hospital; all physiotherapists providing the interventions and research assistant; Bronte Biggins-Tosch for her dedication and thoroughness. Lastly, we would like to thank all the participants on their assistance in contributing to the body of knowledge in this area.

### **Author Contributions**

IB and JL conceived and designed the study and coordinated the trial. LD and SMP assisted in final study design and protocol. JL prepared the first draft of the protocol manuscript, and was responsible for the final manuscript. All authors (JL, IB, IKR, LD, DS and SMP) revised all manuscript drafts, approved the final manuscript and contributed intellectually important content. JL is the guarantor of the paper and takes responsibility for the integrity of the work as a whole, from inception to published article

### **Funding**

This work was supported by the Clifford Craig Foundation, Launceston, Australia (Project 160). The funding body has no influence on the study design, collection or data analysis or publication of results

### **Ethics approval**

The trial is being conducted in accordance with the Declaration of Helsinki and has undergone ethics review by the Tasmanian Health Human Research Ethics Committee and received approval 08/02/2017 (protocol reference H0016207). All participants will provide written informed consent.

### **Conflict of interest declaration**

The authors have no conflicts of interests

## References

1. Schultz MJ, Hemmes SN, Neto AS, et al, LAS VEGAS investigators. Epidemiology, practice of ventilation and outcome for patients at increased risk of postoperative pulmonary complications: LAS VEGAS - an observational study in 29 countries. *Eur J Anaesthesiol* 2017;34(8):492-507. doi: 10.1097/EJA.0000000000000646
2. Neto AS, Hemmes, SN, Barbas, CS, et al, PROVE Network Investigators. Incidence of mortality and morbidity related to postoperative lung injury in patients who have undergone abdominal or thoracic surgery: a systematic review and meta-analysis. *The Lancet Respiratory Medicine*, 2014;12(2):1007-15.
3. Hemmes SN, Gama de Abreu M, Pelosi P, et al. PROVE Network Investigators for the Clinical Trial Network of the European Society of Anaesthesiology. High versus low positive end-expiratory pressure during general anaesthesia for open abdominal surgery (PROVHILO trial): a multicentre randomised controlled trial. *Lancet* 2014;384(9942):495-503. doi: 10.1016/S0140-6736(14)60416-5 [published Online First: 2014/06/05]
4. Haines KJ, Skinner EH, Berney S, et al. Association of postoperative pulmonary complications with delayed mobilisation following major abdominal surgery: an observational cohort study. *Physiotherapy* 2013;99(2):119-25. doi: 10.1016/j.physio.2012.05.013 [published Online First: 2012/12/12]
5. Parry S, Denehy L, Berney S, et al. Clinical application of the Melbourne risk prediction tool in a high-risk upper abdominal surgical population: an observational cohort study. *Physiotherapy* 2014;100(1):47-53. doi: 10.1016/j.physio.2013.05.002 [published Online First: 2013/08/21]
6. Scholes RL, Browning L, Sztendur EM, et al. Duration of anaesthesia, type of surgery, respiratory co-morbidity, predicted VO2max and smoking predict postoperative pulmonary complications after upper abdominal surgery: an observational study. *Aust J Physiother* 2009;55(3):191-8. [published Online First: 2009/08/18]
7. Fernandez-Bustamante A, Frenzl G, Sprung J, et al. Postoperative Pulmonary Complications, Early Mortality, and Hospital Stay Following Noncardiothoracic Surgery: A Multicenter Study by the Perioperative Research Network Investigators. *JAMA Surg* 2017;152(2):157-66. doi: 10.1001/jamasurg.2016.4065 [published Online First: 2016/11/10]
8. Miskovic A, Lumb AB. Postoperative pulmonary complications. *Br J Anaesth* 2017;118(3):317-34. doi: 10.1093/bja/aex002 [published Online First: 2017/02/12]
9. Warner DO. Preventing postoperative pulmonary complications: the role of the anesthesiologist. *Anesthesiology* 2000;92(5):1467-72. [published Online First: 2000/04/26]
10. van Kaam AH, Lachmann RA, Herting E, et al. Reducing atelectasis attenuates bacterial growth and translocation in experimental pneumonia. *Am J Respir Crit Care Med* 2004;169(9):1046-53. doi: 10.1164/rccm.200312-1779OC [published Online First: 2004/02/24]
11. Jaber S, Chanques G, Jung B. Postoperative noninvasive ventilation. *Anesthesiology* 2010;112(2):453-61. doi: 10.1097/ALN.0b013e3181c5e5f2 [published Online First: 2010/01/14]
12. Ruscic KJ, Grabitz SD, Rudolph MI, et al. Prevention of respiratory complications of the surgical patient: actionable plan for continued process improvement. *Curr Opin Anaesthesiol* 2017;30(3):399-408. doi: 10.1097/ACO.0000000000000465 [published Online First: 2017/03/23]
13. Futier E, Jaber S. High-flow nasal cannula following extubation: is more oxygen flow useful after surgery? *Intensive Care Med* 2015;41(7):1310-3. doi: 10.1007/s00134-015-3902-2 [published Online First: 2015/06/17]
14. Ireland CJ, Chapman TM, Mathew SF, et al. Continuous positive airway pressure (CPAP) during the postoperative period for prevention of postoperative morbidity and mortality following

- major abdominal surgery. *Cochrane Database Syst Rev* 2014(8):CD008930. doi: 10.1002/14651858.CD008930.pub2 [published Online First: 2014/08/02]
15. Ferreyra GP, Baussano I, Squadrone V, et al. Continuous positive airway pressure for treatment of respiratory complications after abdominal surgery: a systematic review and meta-analysis. *Ann Surg* 2008;247(4):617-26. doi: 10.1097/SLA.0b013e3181675829 [published Online First: 2008/03/26]
16. Jaber S, Lescot T, Futier E, et al. Effect of Noninvasive Ventilation on Tracheal Reintubation Among Patients With Hypoxemic Respiratory Failure Following Abdominal Surgery: A Randomized Clinical Trial. *JAMA* 2016;315(13):1345-53. doi: 10.1001/jama.2016.2706 [published Online First: 2016/03/16]
17. Chiumello D, Chevillard G, Gregoretti C. Non-invasive ventilation in postoperative patients: a systematic review. *Intensive Care Med* 2011;37(6):918-29. doi: 10.1007/s00134-011-2210-8 [published Online First: 2011/03/23]
18. Squadrone V, Coxa M, Cerutti E, et al. Continuous positive airway pressure for treatment of postoperative hypoxemia: a randomized controlled trial. *JAMA* 2005;293(5):589-95. doi: 10.1001/jama.293.5.589 [published Online First: 2005/02/03]
19. Ricksten SE, Bengtsson A, Soderberg C, et al. Effects of periodic positive airway pressure by mask on postoperative pulmonary function. *Chest* 1986;89(6):774-81. [published Online First: 1986/06/01]
20. Lindner KH, Lotz P, Ahnefeld FW. Continuous positive airway pressure effect on functional residual capacity, vital capacity and its subdivisions. *Chest* 1987;92(1):66-70. [published Online First: 1987/07/01]
21. Patman S, Bartley A, Ferraz A, et al. Physiotherapy in upper abdominal surgery - what is current practice in Australia? *Arch Physiother* 2017;7:11. doi: 10.1186/s40945-017-0039-3 [published Online First: 2018/01/18]
22. Parke R, McGuinness S, Eccleston M. Nasal high-flow therapy delivers low level positive airway pressure. *Br J Anaesth* 2009;103(6):886-90. doi: 10.1093/bja/aep280 [published Online First: 2009/10/23]
23. Groves N, Tobin A. High flow nasal oxygen generates positive airway pressure in adult volunteers. *Aust Crit Care* 2007;20(4):126-31. doi: 10.1016/j.aucc.2007.08.001 [published Online First: 2007/10/13]
24. Corley A, Caruana LR, Barnett AG, et al. Oxygen delivery through high-flow nasal cannulae increase end-expiratory lung volume and reduce respiratory rate in post-cardiac surgical patients. *Br J Anaesth* 2011;107(6):998-1004. doi: 10.1093/bja/aer265 [published Online First: 2011/09/13]
25. Sztrymf B, Messika J, Bertrand F, et al. Beneficial effects of humidified high flow nasal oxygen in critical care patients: a prospective pilot study. *Intensive Care Med* 2011;37(11):1780-6. doi: 10.1007/s00134-011-2354-6 [published Online First: 2011/09/29]
26. Ashraf-Kashani N, Kumar R. High-flow nasal oxygen therapy. *Bja Education* 2017;17(2):57-62.
27. Maggiore SM, Idone FA, Vaschetto R, et al. Nasal high-flow versus Venturi mask oxygen therapy after extubation. Effects on oxygenation, comfort, and clinical outcome. *Am J Respir Crit Care Med* 2014;190(3):282-8. doi: 10.1164/rccm.201402-0364OC [published Online First: 2014/07/09]
28. Parke R, McGuinness S, Dixon R, et al. Open-label, phase II study of routine high-flow nasal oxygen therapy in cardiac surgical patients. *Br J Anaesth* 2013;111(6):925-31. doi: 10.1093/bja/aet262 [published Online First: 2013/08/08]
29. Frat JP, Thille AW, Mercat A, et al. High-flow oxygen through nasal cannula in acute hypoxemic respiratory failure. *N Engl J Med* 2015;372(23):2185-96. doi: 10.1056/NEJMoa1503326 [published Online First: 2015/05/20]
30. Stephan F, Barrucand B, Petit P, et al. High-Flow Nasal Oxygen vs Noninvasive Positive Airway Pressure in Hypoxemic Patients After Cardiothoracic Surgery: A Randomized Clinical Trial.

- 1  
2  
3  
4  
5  
6  
7  
8  
9  
10  
11  
12  
13  
14  
15  
16  
17  
18  
19  
20  
21  
22  
23  
24  
25  
26  
27  
28  
29  
30  
31  
32  
33  
34  
35  
36  
37  
38  
39  
40  
41  
42  
43  
44  
45  
46  
47  
48  
49  
50  
51  
52  
53  
54  
55  
56  
57  
58  
59  
60
- JAMA* 2015;313(23):2331-9. doi: 10.1001/jama.2015.5213 [published Online First: 2015/05/20]
31. Futier E, Paugam-Burtz C, Godet T, et al. Effect of early postextubation high-flow nasal cannula vs conventional oxygen therapy on hypoxaemia in patients after major abdominal surgery: a French multicentre randomised controlled trial (OPERA). *Intensive Care Med* 2016;42(12):1888-98. doi: 10.1007/s00134-016-4594-y [published Online First: 2016/10/25]
32. Ramachandran SK, Nafiu OO, Ghaferi A, et al. Independent predictors and outcomes of unanticipated early postoperative tracheal intubation after nonemergent, noncardiac surgery. *Anesthesiology* 2011;115(1):44-53. doi: 10.1097/ALN.0b013e31821cf6de [published Online First: 2011/05/10]
33. Craig DB. Postoperative recovery of pulmonary function. *Anesth Analg* 1981;60(1):46-52. [published Online First: 1981/01/01]
34. Meyers JR, Lembeck L, O'Kane H, et al. Changes in functional residual capacity of the lung after operation. *Arch Surg* 1975;110(5):576-83. [published Online First: 1975/05/01]
35. Denehy L, Carroll S, Ntoumenopoulos G, et al. A randomized controlled trial comparing periodic mask CPAP with physiotherapy after abdominal surgery. *Physiother Res Int* 2001;6(4):236-50. [published Online First: 2002/02/09]
36. A C. OPERA *The Bottom Line* 2017: [www.thebottomline.org.uk/summaries/icm/opera](http://www.thebottomline.org.uk/summaries/icm/opera).
37. Papazian L, Corley A, Hess D, et al. Use of high-flow nasal cannula oxygenation in ICU adults: a narrative review. *Intensive Care Med* 2016;42(9):1336-49. doi: 10.1007/s00134-016-4277-8 [published Online First: 2016/03/13]
38. Spoletini G, Alotaibi M, Blasi F, et al. Heated Humidified High-Flow Nasal Oxygen in Adults: Mechanisms of Action and Clinical Implications. *Chest* 2015;148(1):253-61. doi: 10.1378/chest.14-2871 [published Online First: 2015/03/06]
39. Lee JH, Rehder KJ, Williford L, et al. Use of high flow nasal cannula in critically ill infants, children, and adults: a critical review of the literature. *Intensive Care Med* 2013;39(2):247-57. doi: 10.1007/s00134-012-2743-5 [published Online First: 2012/11/13]
40. Renda T, Corrado A, Iskandar G, et al. High-flow nasal oxygen therapy in intensive care and anaesthesia. *British Journal of Anaesthesia* 2018;120(1):18-27. doi: 10.1016/j.bja.2017.11.010
41. Lockstone J, Boden I, Denehy L, et al. Does early periodic non-invasive ventilation prevent respiratory complications following high-risk elective upper abdominal surgery? APA Conference 2017; Abstract Book: 143-144. [www.apamomentum2017.asn.au/abstract/](http://www.apamomentum2017.asn.au/abstract/)
42. Millette BH, Athanassoglou V, Patel A. High flow nasal oxygen therapy in adult anaesthesia. *Trends in Anaesthesia and Critical Care*, 2018(18):29-33.
43. Huang HW, Sun XM, Shi ZH, et al. Effect of High-Flow Nasal Cannula Oxygen Therapy Versus Conventional Oxygen Therapy and Noninvasive Ventilation on Reintubation Rate in Adult Patients After Extubation: A Systematic Review and Meta-Analysis of Randomized Controlled Trials. *J Intensive Care Med* 2017;885066617705118. doi: 10.1177/0885066617705118 [published Online First: 2017/04/22]
44. Battisti A, Michotte JB, Tassaux D, et al. Non-invasive ventilation in the recovery room for postoperative respiratory failure: a feasibility study. *Swiss Med Wkly* 2005;135(23-24):339-43. doi: 2005/23/smw-10959 [published Online First: 2005/08/02]
45. Chan AW, Tetzlaff JM, Altman DG, et al. SPIRIT 2013 statement: defining standard protocol items for clinical trials. *Ann Intern Med* 2013;158(3):200-7. doi: 10.7326/0003-4819-158-3-201302050-00583 [published Online First: 2013/01/09]
46. Hoffmann TC, Glasziou PP, Boutron I, et al. Better reporting of interventions: template for intervention description and replication (TIDieR) checklist and guide. *BMJ* 2014;348:g1687. doi: 10.1136/bmj.g1687 [published Online First: 2014/03/13]
47. Boden I, Browning L, Skinner EH, et al. The LIPPSMAck POP (Lung Infection Prevention Post Surgery - Major Abdominal - with Pre-Operative Physiotherapy) trial: study protocol for a



- multi-centre randomised controlled trial. *Trials* 2015;16:573. doi: 10.1186/s13063-015-1090-6 [published Online First: 2015/12/17]
48. Boden I, Skinner EH, Browning L, et al. Preoperative physiotherapy for the prevention of respiratory complications after upper abdominal surgery: pragmatic, double blinded, multicentre randomised controlled trial. *BMJ* 2018;360:j5916. doi: 10.1136/bmj.j5916 [published Online First: 2018/01/26]
49. Brooks D, Parsons J, Newton J, et al. Discharge criteria from perioperative physical therapy. *Chest* 2002;121(2):488-94. [published Online First: 2002/02/09]
50. Beasley R, Chien J, Douglas J, et al. Thoracic Society of Australia and New Zealand oxygen guidelines for acute oxygen use in adults: 'Swimming between the flags'. *Respirology* 2015;20(8):1182-91. doi: 10.1111/resp.12620 [published Online First: 2015/10/22]
51. Agostini P, Naidu B, Cieslik H, et al. Comparison of recognition tools for postoperative pulmonary complications following thoracotomy. *Physiotherapy* 2011;97(4):278-83. doi: 10.1016/j.physio.2010.11.007 [published Online First: 2011/11/05]
52. Sopena N, Sabria M, Neunos Study G. Multicenter study of hospital-acquired pneumonia in non-ICU patients. *Chest* 2005;127(1):213-9. doi: 10.1378/chest.127.1.213 [published Online First: 2005/01/18]
53. Rabin R, de Charro F. EQ-5D: a measure of health status from the EuroQol Group. *Ann Med* 2001;33(5):337-43. [published Online First: 2001/08/09]
54. Groll DL, To T, Bombardier C, et al. The development of a comorbidity index with physical function as the outcome. *J Clin Epidemiol* 2005;58(6):595-602. doi: 10.1016/j.jclinepi.2004.10.018 [published Online First: 2005/05/10]
55. Rankin SL, Briffa TG, Morton AR, et al. A specific activity questionnaire to measure the functional capacity of cardiac patients. *Am J Cardiol* 1996;77(14):1220-3. [published Online First: 1996/06/01]
56. Vather R, Trivedi S, Bissett I. Defining postoperative ileus: results of a systematic review and global survey. *J Gastrointest Surg* 2013;17(5):962-72. doi: 10.1007/s11605-013-2148-y [published Online First: 2013/02/05]
57. Glossop AJ, Shephard N, Bryden DC, et al. Non-invasive ventilation for weaning, avoiding reintubation after extubation and in the postoperative period: a meta-analysis. *Br J Anaesth* 2012;109(3):305-14. doi: 10.1093/bja/aes270 [published Online First: 2012/08/11]
58. Roberts C, Torgerson DJ. Understanding controlled trials: baseline imbalance in randomised controlled trials. *BMJ* 1999;319(7203):185. [published Online First: 1999/07/16]
59. Bickenbach KA, Karanicolas PJ, Ammori JB, et al. Up and down or side to side? A systematic review and meta-analysis examining the impact of incision on outcomes after abdominal surgery. *Am J Surg* 2013;206(3):400-9. doi: 10.1016/j.amjsurg.2012.11.008 [published Online First: 2013/04/11]
60. Severgnini P, Selmo G, Lanza C, et al. Protective mechanical ventilation during general anesthesia for open abdominal surgery improves postoperative pulmonary function. *Anesthesiology* 2013;118(6):1307-21. doi: 10.1097/ALN.0b013e31829102de [published Online First: 2013/04/02]
61. Corcoran T, Rhodes JE, Clarke S, et al. Perioperative fluid management strategies in major surgery: a stratified meta-analysis. *Anesth Analg* 2012;114(3):640-51. doi: 10.1213/ANE.0b013e318240d6eb [published Online First: 2012/01/19]
62. Nobili C, Marzano E, Oussoultzoglou E, et al. Multivariate analysis of risk factors for pulmonary complications after hepatic resection. *Ann Surg* 2012;255(3):540-50. doi: 10.1097/SLA.0b013e3182485857 [published Online First: 2012/02/15]
63. Peyton PJ, Myles PS, Silbert BS, et al. Perioperative epidural analgesia and outcome after major abdominal surgery in high-risk patients. *Anesth Analg* 2003;96(2):548-, table of contents. [published Online First: 2003/01/23]

1  
2  
3  
4 64. Waller HM, Connor SJ. Cumulative sum (Cusum) analysis provides an objective measure of  
5 competency during training in endoscopic retrograde cholangio-pancreatography (ERCP).  
6 *HPB (Oxford)* 2009;11(7):565-9. doi: 10.1111/j.1477-2574.2009.00091.x [published Online  
7 First: 2010/05/25]  
8  
9  
10  
11  
12  
13  
14  
15  
16  
17  
18  
19  
20  
21  
22  
23  
24  
25  
26  
27  
28  
29  
30  
31  
32  
33  
34  
35  
36  
37  
38  
39  
40  
41  
42  
43  
44  
45  
46  
47  
48  
49  
50  
51  
52  
53  
54  
55  
56  
57  
58  
59  
60

For peer review only

**Table 1 Trial Registration Data Set for NIPPER PLUS trial**

| <b>Data Category</b>                                         | <b>Information</b>                                                                                                                                                                                                                                                                                                                                                                                                                                                                                                                                                                                                                                                                                                             |
|--------------------------------------------------------------|--------------------------------------------------------------------------------------------------------------------------------------------------------------------------------------------------------------------------------------------------------------------------------------------------------------------------------------------------------------------------------------------------------------------------------------------------------------------------------------------------------------------------------------------------------------------------------------------------------------------------------------------------------------------------------------------------------------------------------|
| Primary registry and trial identifying number                | Australian New Zealand Clinical Trials Registry number: ACTRN12617000269336                                                                                                                                                                                                                                                                                                                                                                                                                                                                                                                                                                                                                                                    |
| Date of registration in primary registry                     | 22/02/2017                                                                                                                                                                                                                                                                                                                                                                                                                                                                                                                                                                                                                                                                                                                     |
| Secondary identifying numbers                                | n/a                                                                                                                                                                                                                                                                                                                                                                                                                                                                                                                                                                                                                                                                                                                            |
| Trial protocol version                                       | This is Version 2 of the protocol and was enacted on February 2017                                                                                                                                                                                                                                                                                                                                                                                                                                                                                                                                                                                                                                                             |
| Source of monetary or material support                       | Clifford Craig Foundation (\$80,000 AUD)                                                                                                                                                                                                                                                                                                                                                                                                                                                                                                                                                                                                                                                                                       |
| Contact for public queries                                   | JL, jane.lockstone@ths.tas.gov.au                                                                                                                                                                                                                                                                                                                                                                                                                                                                                                                                                                                                                                                                                              |
| Contact for scientific queries                               | JL, jane.lockstone@ths.tas.gov.au                                                                                                                                                                                                                                                                                                                                                                                                                                                                                                                                                                                                                                                                                              |
| Public title                                                 | Does early postoperative non-invasive ventilation (NIV) prevent chest infections following high-risk elective abdominal surgery                                                                                                                                                                                                                                                                                                                                                                                                                                                                                                                                                                                                |
| Scientific title                                             | NIPPER-PLUS trial – Non-Invasive Positive airway Pressure therapy to Reduce Postoperative Lung Complications following Upper abdominal Surgery: a single centre pilot randomised control trial                                                                                                                                                                                                                                                                                                                                                                                                                                                                                                                                 |
| Countries of recruitment                                     | Australia                                                                                                                                                                                                                                                                                                                                                                                                                                                                                                                                                                                                                                                                                                                      |
| Health condition(s) or problem(s) studied<br>Intervention(s) | Pulmonary complications following high-risk elective upper abdominal surgery<br>Active comparator: Physiotherapy-led postoperative NIV therapy<br>Placebo comparator: high-flow nasal prong oxygen therapy                                                                                                                                                                                                                                                                                                                                                                                                                                                                                                                     |
| Key inclusion and exclusion criteria                         | <p>Ages eligible for study: <math>\geq 18</math> years<br/>Sexes eligible for study: both<br/>Accepts health volunteers: No</p> <p>Inclusion criteria: All adults undergoing high-risk elective open and/or advanced hand-assisted laparoscopic abdominal surgery.</p> <p>Exclusion criteria: 1. Any absolute contraindications for NIV in the period following surgery prior to the first NIV session; 2. Oesophageal surgery; 3. Obstructive sleep apnoea requiring CPAP overnight; 4 extreme claustrophobia; 5. not able to understand verbal instructions in English; 6. do not have capacity to give consent themselves; 7. a current hospital patient for a separate episode of care; 8. requiring organ transplant.</p> |
| Study type                                                   | Type: Investigator initiated, interventional, non-pharmacological, pilot study<br>Allocation: Concealed randomisation<br>Intervention model: parallel assignment<br>Masking: assessor blinding<br>Primary purpose: Prevention<br>Phase: Phase 2                                                                                                                                                                                                                                                                                                                                                                                                                                                                                |
| Date of first enrolment                                      | 23/02/2017                                                                                                                                                                                                                                                                                                                                                                                                                                                                                                                                                                                                                                                                                                                     |
| Target sample size                                           | Minimum 130                                                                                                                                                                                                                                                                                                                                                                                                                                                                                                                                                                                                                                                                                                                    |
| Recruitment status                                           | Recruiting                                                                                                                                                                                                                                                                                                                                                                                                                                                                                                                                                                                                                                                                                                                     |
| Primary Outcome                                              | Postoperative pulmonary complication during the first 14 postoperative days                                                                                                                                                                                                                                                                                                                                                                                                                                                                                                                                                                                                                                                    |
| Key secondary outcomes                                       | Recruitment ability, physiotherapy-led NIV and high-flow nasal oxygen therapy protocol adherence, safety of NIV therapy, associated costs of high-flow nasal oxygen therapy and a physiotherapy-led NIV service following upper abdominal surgery. In addition, this study will explore effects on incidence of pneumonia, intensive care unit (ICU) and hospital length of hospital, ICU readmission rates, incidence of reintubation, in-hospital, 30-day and 12-month all-cause mortality and health related quality of life.                                                                                                                                                                                               |

**Table 2 Contraindications and Adverse events relating to NIV therapy**

| <b>Absolute Contraindications</b>                                      | <b>Relative Contraindications</b>                                             | <b>Major Adverse Event</b>                                                     | <b>Transient physiological event</b>                                                                            |
|------------------------------------------------------------------------|-------------------------------------------------------------------------------|--------------------------------------------------------------------------------|-----------------------------------------------------------------------------------------------------------------|
| Cardiac or respiratory arrest                                          | Mildly decreased level of consciousness                                       | Anastomotic leak                                                               | hypotension, defined as a decrease in blood pressure >20mmHg determined by pre/post blood pressure observations |
| Severe agitation or encephalopathy                                     | Progressive severe respiratory failure as reported by the treating physician  | Severe hypotension requiring increase in medical management                    | decrease in SpO <sub>2</sub> oxygen saturations >10% from baseline or <85% for >60 seconds                      |
| Undrained pneumothorax or intraoperative pneumothorax with ICC in-situ | Uncooperative patient who can be calmed or comforted                          | cardiac or respiratory arrest                                                  | gastric distention as clinically reported by the treating surgeon                                               |
| Uncontrolled vomiting                                                  | SpO <sub>2</sub> falls below >10% below resting level of <85% for >60 seconds | Deterioration in medical condition requiring an increase in medical management | Vomiting during the NIV therapy                                                                                 |
| Inability to protect airway                                            | MAP < target pressure despite vasopressor                                     |                                                                                | Nasal bridge or facial erythema or ulceration                                                                   |
| Severe upper GI bleeding or haemoptysis                                | Resting HR <50 or >140 or new untreated arrhythmia develops                   |                                                                                |                                                                                                                 |
| Need for immediate intubation                                          | RR <5 or >40 b/min                                                            |                                                                                |                                                                                                                 |
| Facial trauma                                                          |                                                                               |                                                                                |                                                                                                                 |

*Abbreviations: HR, heart rate; ICC, intercostal catheter; MAP, Mean arterial pressure; NIV, non-invasive ventilation; RR, respiratory rate; SpO<sub>2</sub>, saturation of peripheral oxygen; Upper GI, Upper gastrointestinal; >, greater than; <, less than*

**Table 3 Early postoperative ambulation protocol<sup>48</sup>**

|                      |                                                        |
|----------------------|--------------------------------------------------------|
| Stage 1 (Safety)     | Sit over edge of bed/sit in chair minimum of 2 minutes |
| Stage 2 (Safety)     | March on spot 0-1 minute                               |
| Stage 3 (Ambulation) | March on spot/walk away from bedside 1-3 minutes       |
| Stage 4 (Ambulation) | March on spot/walk away from bedside 3 – 6 minutes     |
| Stage 5 (Ambulation) | Walk away from bedside 6 – 10 minutes                  |
| Stage 6 (Ambulation) | Walk away from bedside 10 – 15 minutes                 |
| Stage 7 (Ambulation) | Walk away from bedside > 15 minutes                    |

**PROTOCOL**

Provide assisted early ambulation as soon as possible on the first postoperative day.

At each session progress through each stage in sequence. Time achieved in the session is accumulative.

Aim to achieve rating of perceived exertion of greater than 3/10.

Aim to assist patient to ambulate more than 10 minutes (Stage 6 or greater).

Once patient able to ambulate past Stage 3, patient can be assisted to ambulate with a Physiotherapy Assistant, as long as safe to do as determined by the ward physiotherapist.

Interval training is permissible to obtain target walking time. Each interval of rest time must not exceed the preceding work time. Total session time is the accumulative work time.

Provide assisted early ambulation once a day until discharged according to the discharge scoring tool<sup>49</sup>

**Table 4 Postoperative pulmonary complications diagnostic tool: Melbourne Group Score Version 2<sup>48</sup>**

*Diagnosis confirmed when 4 or more of the following criteria are present anytime in the 24-hour period 00:01 to 24:00 on a single postoperative day:*

1. New abnormal breath sounds on auscultation different to preoperative assessment
2. Productive of yellow or green sputum different to preoperative assessment
3. Pulse oximetry oxygen saturation (SpO<sub>2</sub>) < 90% on room air on more than one consecutive postoperative day
4. Raised maximum oral temperature > 38°C on more than one consecutive day
5. An unexplained white cell count greater than 11 x10<sup>9</sup>/L
6. Presence of infection on sputum culture report
7. Chest radiograph (CXR) report of collapse/consolidation. Chest radiograph (CXR) report of collapse/consolidation. When a CXR has been taken but no report available, a ward medical officer, or a senior respiratory physiotherapist with more than 10 years' experience will be asked to report.
8. Physician's diagnosis of pneumonia, lower or upper respiratory tract infection, an undefined chest infection or prescription of an antibiotic for a respiratory infection

## Figure Legends

**Figure 1 NIPPER PLUS participant timeline and schedule of events;** *Abbreviations: D/C; discharge, ICU; intensive care unit, LOS; length of stay, NIV; Non-invasive ventilation, POD; postoperative day, PPC; postoperative pulmonary complication, HRQoL; health-related quality of life*

**Figure 2 CONSORT flow diagram for the NIPPER PLUS study;** *Abbreviations: NIV, non-invasive ventilation, PPC; postoperative pulmonary complication, POD; postoperative day, HRQoL; health-related quality of life*

Figure 1 NIPPER PLUS participant timeline and schedule of events

|                       | TIMEPOINT                                                                                               | Enrolment                   | Allocation           |                |         | Post Allocation |              |        | Close out |  |
|-----------------------|---------------------------------------------------------------------------------------------------------|-----------------------------|----------------------|----------------|---------|-----------------|--------------|--------|-----------|--|
|                       |                                                                                                         | Listed for elective surgery | Pre-admission clinic | Day of surgery | POD 1-7 | POD 8-14        | Hospital D/C | POD 30 | 12 month  |  |
| <b>ENROLMENT:</b>     | <i>Enrolment</i>                                                                                        |                             | X                    |                |         |                 |              |        |           |  |
|                       | <i>Eligibility screen</i>                                                                               | X                           |                      |                |         |                 |              |        |           |  |
|                       | <i>Informed consent</i>                                                                                 |                             | X                    |                |         |                 |              |        |           |  |
|                       | <i>Random Allocation</i>                                                                                |                             |                      | X              |         |                 |              |        |           |  |
| <b>INTERVENTIONS:</b> | <i>Control; High-flow nasal oxygen therapy</i>                                                          |                             |                      | X              | X       |                 |              |        |           |  |
|                       | <i>Intervention: High-flow nasal oxygen therapy plus intermittent postoperative NIV</i>                 |                             |                      | X              | X       |                 |              |        |           |  |
| <b>VARIABLES:</b>     | <i>Demographics, medical history, HRQoL</i>                                                             |                             | X                    |                |         |                 |              |        |           |  |
|                       | <i>Intraoperative variables</i>                                                                         |                             |                      |                | X       |                 |              |        |           |  |
|                       | <i>Postoperative variables</i>                                                                          |                             |                      |                | X       | X               | X            |        |           |  |
| <b>OUTCOMES:</b>      | <i>PPC</i>                                                                                              |                             |                      |                | X       | X               |              |        |           |  |
|                       | <i>Recruitment ability, physiotherapy-led NIV and high-flow nasal oxygen therapy protocol adherence</i> |                             |                      |                | X       |                 |              |        |           |  |
|                       | <i>Major adverse events and/or transient physiological events of NIV</i>                                |                             |                      |                | X       |                 |              |        |           |  |
|                       | <i>Associated costs of physiotherapy-led NIV &amp; a high-flow nasal oxygen therapy service</i>         |                             |                      |                | X       | X               | X            |        |           |  |
|                       | <i>Pneumonia, Hospital and ICU LOS, ICU readmission and reintubation rates, in-hospital mortality</i>   |                             |                      |                | X       | X               | X            |        |           |  |
|                       | <i>HRQoL (EQ-5D-5L)</i>                                                                                 |                             |                      |                | X       | X               |              |        | X         |  |
|                       | <i>30-day and 12-month all-cause mortality</i>                                                          |                             |                      |                |         |                 |              | X      | X         |  |

Abbreviations: D/C; discharge, ICU; intensive care unit, LOS; length of stay, NIV; Non-invasive ventilation, POD; postoperative day, PPC; postoperative pulmonary complication, HRQoL; health-related quality of life

Figure 1 NIPPER PLUS participant timeline and schedule of events

279x361mm (300 x 300 DPI)



Figure 2 CONSORT flow diagram for the NIPPER PLUS study

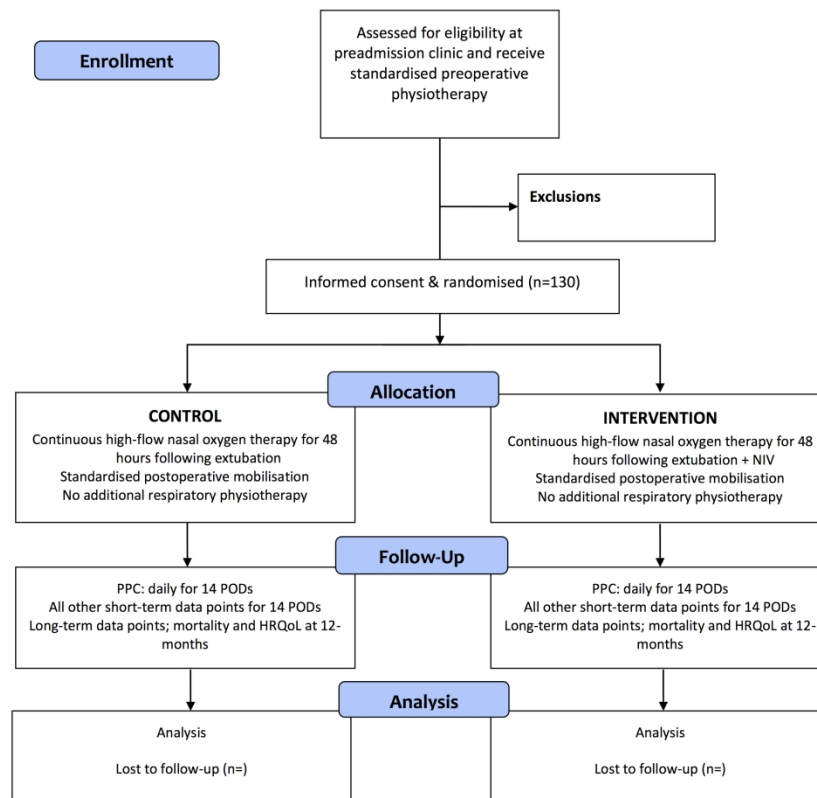

Abbreviations: NIV, non-invasive ventilation, PPC, postoperative pulmonary complication, POD; postoperative day, HRQoL; health-related quality of life

Figure 2 CONSORT flow diagram for the NIPPER PLUS study

279x361mm (300 x 300 DPI)

# Reporting checklist for protocol of a clinical trial.

Based on the SPIRIT guidelines.

## Instructions to authors

Complete this checklist by entering the page numbers from your manuscript where readers will find each of the items listed below.

Your article may not currently address all the items on the checklist. Please modify your text to include the missing information. If you are certain that an item does not apply, please write "n/a" and provide a short explanation.

Upload your completed checklist as an extra file when you submit to a journal.

In your methods section, say that you used the SPIRIT reporting guidelines, and cite them as:

Chan A-W, Tetzlaff JM, Altman DG, Laupacis A, Gøtzsche PC, Krleža-Jerić K, Hróbjartsson A, Mann H, Dickersin K, Berlin J, Doré C, Parulekar W, Summerskill W, Groves T, Schulz K, Sox H, Rockhold FW, Rennie D, Moher D. SPIRIT 2013 Statement: Defining standard protocol items for clinical trials. *Ann Intern Med.* 2013;158(3):200-207

|                                             |                     | Reporting Item                                                                                               | Page Number    |
|---------------------------------------------|---------------------|--------------------------------------------------------------------------------------------------------------|----------------|
| Title                                       | <a href="#">#1</a>  | Descriptive title identifying the study design, population, interventions, and, if applicable, trial acronym | 1              |
| Trial registration                          | <a href="#">#2a</a> | Trial identifier and registry name. If not yet registered, name of intended registry                         | 6              |
| Trial registration: data set                | <a href="#">#2b</a> | All items from the World Health Organization Trial Registration Data Set                                     | 26<br>(Table1) |
| Protocol version                            | <a href="#">#3</a>  | Date and version identifier                                                                                  | 26<br>(Table1) |
| Funding                                     | <a href="#">#4</a>  | Sources and types of financial, material, and other support                                                  | 20             |
| Roles and responsibilities: contributorship | <a href="#">#5a</a> | Names, affiliations, and roles of protocol contributors                                                      | 1              |
| Roles and                                   | <a href="#">#5b</a> | Name and contact information for the trial sponsor                                                           | N/A            |

|                         |                      |                                                                   |       |
|-------------------------|----------------------|-------------------------------------------------------------------|-------|
| responsibilities:       |                      |                                                                   |       |
| 1 sponsor contact       |                      |                                                                   |       |
| 2 information           |                      |                                                                   |       |
| 3                       |                      |                                                                   |       |
| 4                       |                      |                                                                   |       |
| 5 Roles and             | <a href="#">#5c</a>  | Role of study sponsor and funders, if any, in study design;       | 20    |
| 6 responsibilities:     |                      | collection, management, analysis, and interpretation of           |       |
| 7 sponsor and funder    |                      | data; writing of the report; and the decision to submit the       |       |
| 8                       |                      | report for publication, including whether they will have          |       |
| 9                       |                      | ultimate authority over any of these activities                   |       |
| 10                      |                      |                                                                   |       |
| 11                      |                      |                                                                   |       |
| 12                      |                      |                                                                   |       |
| 13                      |                      |                                                                   |       |
| 14 Roles and            | <a href="#">#5d</a>  | Composition, roles, and responsibilities of the coordinating      | 17-18 |
| 15 responsibilities:    |                      | centre, steering committee, endpoint adjudication                 |       |
| 16 committees           |                      | committee, data management team, and other individuals            |       |
| 17                      |                      | or groups overseeing the trial, if applicable (see Item 21a       |       |
| 18                      |                      | for data monitoring committee)                                    |       |
| 19                      |                      |                                                                   |       |
| 20                      |                      |                                                                   |       |
| 21                      |                      |                                                                   |       |
| 22 Background and       | <a href="#">#6a</a>  | Description of research question and justification for            | 3-5   |
| 23 rationale            |                      | undertaking the trial, including summary of relevant studies      |       |
| 24                      |                      | (published and unpublished) examining benefits and harms          |       |
| 25                      |                      | for each intervention                                             |       |
| 26                      |                      |                                                                   |       |
| 27                      |                      |                                                                   |       |
| 28                      |                      |                                                                   |       |
| 29 Background and       | <a href="#">#6b</a>  | Explanation for choice of comparators                             | 3-5   |
| 30 rationale: choice of |                      |                                                                   |       |
| 31 comparators          |                      |                                                                   |       |
| 32                      |                      |                                                                   |       |
| 33                      |                      |                                                                   |       |
| 34 Objectives           | <a href="#">#7</a>   | Specific objectives or hypotheses                                 | 5     |
| 35                      |                      |                                                                   |       |
| 36                      |                      |                                                                   |       |
| 37 Trial design         | <a href="#">#8</a>   | Description of trial design including type of trial (eg, parallel | 6     |
| 38                      |                      | group, crossover, factorial, single group), allocation ratio,     |       |
| 39                      |                      | and framework (eg, superiority, equivalence, non-inferiority,     |       |
| 40                      |                      | exploratory)                                                      |       |
| 41                      |                      |                                                                   |       |
| 42                      |                      |                                                                   |       |
| 43 Study setting        | <a href="#">#9</a>   | Description of study settings (eg, community clinic,              | 6     |
| 44                      |                      | academic hospital) and list of countries where data will be       |       |
| 45                      |                      | collected. Reference to where list of study sites can be          |       |
| 46                      |                      | obtained                                                          |       |
| 47                      |                      |                                                                   |       |
| 48                      |                      |                                                                   |       |
| 49                      |                      |                                                                   |       |
| 50 Eligibility criteria | <a href="#">#10</a>  | Inclusion and exclusion criteria for participants. If             | 7     |
| 51                      |                      | applicable, eligibility criteria for study centres and            |       |
| 52                      |                      | individuals who will perform the interventions (eg,               |       |
| 53                      |                      | surgeons, psychotherapists)                                       |       |
| 54                      |                      |                                                                   |       |
| 55                      |                      |                                                                   |       |
| 56                      |                      |                                                                   |       |
| 57 Interventions:       | <a href="#">#11a</a> | Interventions for each group with sufficient detail to allow      | 9-11  |
| 58 description          |                      | replication, including how and when they will be                  |       |
| 59                      |                      |                                                                   |       |
| 60                      |                      |                                                                   |       |

|    |                      |                                                                                 |          |
|----|----------------------|---------------------------------------------------------------------------------|----------|
|    |                      | administered                                                                    |          |
| 1  |                      |                                                                                 |          |
| 2  |                      |                                                                                 |          |
| 3  | Interventions:       | <a href="#">#11b</a> Criteria for discontinuing or modifying allocated          | 9-11     |
| 4  | modifications        | interventions for a given trial participant (eg, drug dose                      |          |
| 5  |                      | change in response to harms, participant request, or                            |          |
| 6  |                      | improving / worsening disease)                                                  |          |
| 7  |                      |                                                                                 |          |
| 8  |                      |                                                                                 |          |
| 9  | Interventions:       | <a href="#">#11c</a> Strategies to improve adherence to intervention protocols, | 10       |
| 10 | adherence            | and any procedures for monitoring adherence (eg, drug                           |          |
| 11 |                      | tablet return; laboratory tests)                                                |          |
| 12 |                      |                                                                                 |          |
| 13 |                      |                                                                                 |          |
| 14 | Interventions:       | <a href="#">#11d</a> Relevant concomitant care and interventions that are       | 9        |
| 15 | concomitant care     | permitted or prohibited during the trial                                        |          |
| 16 |                      |                                                                                 |          |
| 17 |                      |                                                                                 |          |
| 18 | Outcomes             | <a href="#">#12</a> Primary, secondary, and other outcomes, including the       | 11-13    |
| 19 |                      | specific measurement variable (eg, systolic blood                               |          |
| 20 |                      | pressure), analysis metric (eg, change from baseline, final                     |          |
| 21 |                      | value, time to event), method of aggregation (eg, median,                       |          |
| 22 |                      | proportion), and time point for each outcome. Explanation                       |          |
| 23 |                      | of the clinical relevance of chosen efficacy and harm                           |          |
| 24 |                      | outcomes is strongly recommended                                                |          |
| 25 |                      |                                                                                 |          |
| 26 |                      |                                                                                 |          |
| 27 |                      |                                                                                 |          |
| 28 |                      |                                                                                 |          |
| 29 |                      |                                                                                 |          |
| 30 | Participant timeline | <a href="#">#13</a> Time schedule of enrolment, interventions (including any    | Figure 1 |
| 31 |                      | run-ins and washouts), assessments, and visits for                              |          |
| 32 |                      | participants. A schematic diagram is highly recommended                         |          |
| 33 |                      | (see Figure)                                                                    |          |
| 34 |                      |                                                                                 |          |
| 35 |                      |                                                                                 |          |
| 36 | Sample size          | <a href="#">#14</a> Estimated number of participants needed to achieve study    | 15-16    |
| 37 |                      | objectives and how it was determined, including clinical                        |          |
| 38 |                      | and statistical assumptions supporting any sample size                          |          |
| 39 |                      | calculations                                                                    |          |
| 40 |                      |                                                                                 |          |
| 41 |                      |                                                                                 |          |
| 42 |                      |                                                                                 |          |
| 43 | Recruitment          | <a href="#">#15</a> Strategies for achieving adequate participant enrolment to  | 15-16    |
| 44 |                      | reach target sample size                                                        |          |
| 45 |                      |                                                                                 |          |
| 46 |                      |                                                                                 |          |
| 47 | Allocation: sequence | <a href="#">#16a</a> Method of generating the allocation sequence (eg,          | 7-8      |
| 48 | generation           | computer-generated random numbers), and list of any                             |          |
| 49 |                      | factors for stratification. To reduce predictability of a                       |          |
| 50 |                      | random sequence, details of any planned restriction (eg,                        |          |
| 51 |                      | blocking) should be provided in a separate document that                        |          |
| 52 |                      | is unavailable to those who enrol participants or assign                        |          |
| 53 |                      | interventions                                                                   |          |
| 54 |                      |                                                                                 |          |
| 55 |                      |                                                                                 |          |
| 56 |                      |                                                                                 |          |
| 57 |                      |                                                                                 |          |
| 58 | Allocation           | <a href="#">#16b</a> Mechanism of implementing the allocation sequence (eg,     | 7-8      |
| 59 |                      |                                                                                 |          |
| 60 |                      |                                                                                 |          |

|                                                                      |                                                |                      |                                                                                                                                                                                                                                                                                                                                                                                                              |          |
|----------------------------------------------------------------------|------------------------------------------------|----------------------|--------------------------------------------------------------------------------------------------------------------------------------------------------------------------------------------------------------------------------------------------------------------------------------------------------------------------------------------------------------------------------------------------------------|----------|
| 1<br>2<br>3<br>4                                                     | concealment<br>mechanism                       |                      | central telephone; sequentially numbered, opaque, sealed envelopes), describing any steps to conceal the sequence until interventions are assigned                                                                                                                                                                                                                                                           |          |
| 5<br>6<br>7<br>8<br>9                                                | Allocation:<br>implementation                  | <a href="#">#16c</a> | Who will generate the allocation sequence, who will enrol participants, and who will assign participants to interventions                                                                                                                                                                                                                                                                                    | 7-8      |
| 10<br>11<br>12<br>13<br>14<br>15                                     | Blinding (masking)                             | <a href="#">#17a</a> | Who will be blinded after assignment to interventions (eg, trial participants, care providers, outcome assessors, data analysts), and how                                                                                                                                                                                                                                                                    | 13       |
| 16<br>17<br>18<br>19<br>20                                           | Blinding (masking):<br>emergency<br>unblinding | <a href="#">#17b</a> | If blinded, circumstances under which unblinding is permissible, and procedure for revealing a participant's allocated intervention during the trial                                                                                                                                                                                                                                                         | 13       |
| 21<br>22<br>23<br>24<br>25<br>26<br>27<br>28<br>29<br>30<br>31<br>32 | Data collection plan                           | <a href="#">#18a</a> | Plans for assessment and collection of outcome, baseline, and other trial data, including any related processes to promote data quality (eg, duplicate measurements, training of assessors) and a description of study instruments (eg, questionnaires, laboratory tests) along with their reliability and validity, if known. Reference to where data collection forms can be found, if not in the protocol | 14,15,16 |
| 33<br>34<br>35<br>36<br>37<br>38                                     | Data collection plan:<br>retention             | <a href="#">#18b</a> | Plans to promote participant retention and complete follow-up, including list of any outcome data to be collected for participants who discontinue or deviate from intervention protocols                                                                                                                                                                                                                    | 12, 16   |
| 39<br>40<br>41<br>42<br>43<br>44<br>45<br>46<br>47                   | Data management                                | <a href="#">#19</a>  | Plans for data entry, coding, security, and storage, including any related processes to promote data quality (eg, double data entry; range checks for data values). Reference to where details of data management procedures can be found, if not in the protocol                                                                                                                                            | 16       |
| 48<br>49<br>50<br>51<br>52                                           | Statistics: outcomes                           | <a href="#">#20a</a> | Statistical methods for analysing primary and secondary outcomes. Reference to where other details of the statistical analysis plan can be found, if not in the protocol                                                                                                                                                                                                                                     | 16-17    |
| 53<br>54<br>55<br>56                                                 | Statistics: additional<br>analyses             | <a href="#">#20b</a> | Methods for any additional analyses (eg, subgroup and adjusted analyses)                                                                                                                                                                                                                                                                                                                                     | 16-17    |
| 57<br>58<br>59<br>60                                                 | Statistics: analysis<br>population and         | <a href="#">#20c</a> | Definition of analysis population relating to protocol non-adherence (eg, as randomised analysis), and any statistical                                                                                                                                                                                                                                                                                       | 16-17    |

|    |                    |                      |                                                                 |       |
|----|--------------------|----------------------|-----------------------------------------------------------------|-------|
| 1  | missing data       |                      | methods to handle missing data (eg, multiple imputation)        |       |
| 2  | Data monitoring:   | <a href="#">#21a</a> | Composition of data monitoring committee (DMC);                 | 17-18 |
| 3  | formal committee   |                      | summary of its role and reporting structure; statement of       |       |
| 4  |                    |                      | whether it is independent from the sponsor and competing        |       |
| 5  |                    |                      | interests; and reference to where further details about its     |       |
| 6  |                    |                      | charter can be found, if not in the protocol. Alternatively, an |       |
| 7  |                    |                      | explanation of why a DMC is not needed                          |       |
| 8  |                    |                      |                                                                 |       |
| 9  |                    |                      |                                                                 |       |
| 10 |                    |                      |                                                                 |       |
| 11 |                    |                      |                                                                 |       |
| 12 | Data monitoring:   | <a href="#">#21b</a> | Description of any interim analyses and stopping                | 17-18 |
| 13 | interim analysis   |                      | guidelines, including who will have access to these interim     |       |
| 14 |                    |                      | results and make the final decision to terminate the trial      |       |
| 15 |                    |                      |                                                                 |       |
| 16 |                    |                      |                                                                 |       |
| 17 | Harms              | <a href="#">#22</a>  | Plans for collecting, assessing, reporting, and managing        | 17-18 |
| 18 |                    |                      | solicited and spontaneously reported adverse events and         |       |
| 19 |                    |                      | other unintended effects of trial interventions or trial        |       |
| 20 |                    |                      | conduct                                                         |       |
| 21 |                    |                      |                                                                 |       |
| 22 |                    |                      |                                                                 |       |
| 23 |                    |                      |                                                                 |       |
| 24 | Auditing           | <a href="#">#23</a>  | Frequency and procedures for auditing trial conduct, if any,    | N/A   |
| 25 |                    |                      | and whether the process will be independent from                |       |
| 26 |                    |                      | investigators and the sponsor                                   |       |
| 27 |                    |                      |                                                                 |       |
| 28 |                    |                      |                                                                 |       |
| 29 |                    |                      |                                                                 |       |
| 30 | Research ethics    | <a href="#">#24</a>  | Plans for seeking research ethics committee / institutional     | 20    |
| 31 | approval           |                      | review board (REC / IRB) approval                               |       |
| 32 |                    |                      |                                                                 |       |
| 33 |                    |                      |                                                                 |       |
| 34 | Protocol           | <a href="#">#25</a>  | Plans for communicating important protocol modifications        | N/A   |
| 35 | amendments         |                      | (eg, changes to eligibility criteria, outcomes, analyses) to    |       |
| 36 |                    |                      | relevant parties (eg, investigators, REC / IRBs, trial          |       |
| 37 |                    |                      | participants, trial registries, journals, regulators)           |       |
| 38 |                    |                      |                                                                 |       |
| 39 |                    |                      |                                                                 |       |
| 40 | Consent or assent  | <a href="#">#26a</a> | Who will obtain informed consent or assent from potential       | 6-7   |
| 41 |                    |                      | trial participants or authorised surrogates, and how (see       |       |
| 42 |                    |                      | Item 32)                                                        |       |
| 43 |                    |                      |                                                                 |       |
| 44 |                    |                      |                                                                 |       |
| 45 |                    |                      |                                                                 |       |
| 46 | Consent or assent: | <a href="#">#26b</a> | Additional consent provisions for collection and use of         | N/A   |
| 47 | ancillary studies  |                      | participant data and biological specimens in ancillary          |       |
| 48 |                    |                      | studies, if applicable                                          |       |
| 49 |                    |                      |                                                                 |       |
| 50 |                    |                      |                                                                 |       |
| 51 | Confidentiality    | <a href="#">#27</a>  | How personal information about potential and enrolled           | 16    |
| 52 |                    |                      | participants will be collected, shared, and maintained in       |       |
| 53 |                    |                      | order to protect confidentiality before, during, and after the  |       |
| 54 |                    |                      | trial                                                           |       |
| 55 |                    |                      |                                                                 |       |
| 56 |                    |                      |                                                                 |       |
| 57 |                    |                      |                                                                 |       |
| 58 | Declaration of     | <a href="#">#28</a>  | Financial and other competing interests for principal           | 20    |
| 59 |                    |                      |                                                                 |       |
| 60 |                    |                      |                                                                 |       |

|    |                       |                      |                                                                 |        |
|----|-----------------------|----------------------|-----------------------------------------------------------------|--------|
| 1  | interests             |                      | investigators for the overall trial and each study site         |        |
| 2  |                       |                      |                                                                 |        |
| 3  | Data access           | <a href="#">#29</a>  | Statement of who will have access to the final trial dataset,   | 16     |
| 4  |                       |                      | and disclosure of contractual agreements that limit such        |        |
| 5  |                       |                      | access for investigators                                        |        |
| 6  |                       |                      |                                                                 |        |
| 7  |                       |                      |                                                                 |        |
| 8  | Ancillary and post    | <a href="#">#30</a>  | Provisions, if any, for ancillary and post-trial care, and for  | N/A    |
| 9  | trial care            |                      | compensation to those who suffer harm from trial                |        |
| 10 |                       |                      | participation                                                   |        |
| 11 |                       |                      |                                                                 |        |
| 12 |                       |                      |                                                                 |        |
| 13 | Dissemination policy: | <a href="#">#31a</a> | Plans for investigators and sponsor to communicate trial        | 16, 18 |
| 14 | trial results         |                      | results to participants, healthcare professionals, the public,  |        |
| 15 |                       |                      | and other relevant groups (eg, via publication, reporting in    |        |
| 16 |                       |                      | results databases, or other data sharing arrangements),         |        |
| 17 |                       |                      | including any publication restrictions                          |        |
| 18 |                       |                      |                                                                 |        |
| 19 |                       |                      |                                                                 |        |
| 20 |                       |                      |                                                                 |        |
| 21 | Dissemination policy: | <a href="#">#31b</a> | Authorship eligibility guidelines and any intended use of       | N/A    |
| 22 | authorship            |                      | professional writers                                            |        |
| 23 |                       |                      |                                                                 |        |
| 24 |                       |                      |                                                                 |        |
| 25 | Dissemination policy: | <a href="#">#31c</a> | Plans, if any, for granting public access to the full protocol, | 16     |
| 26 | reproducible          |                      | participant-level dataset, and statistical code                 |        |
| 27 | research              |                      |                                                                 |        |
| 28 |                       |                      |                                                                 |        |
| 29 |                       |                      |                                                                 |        |
| 30 | Informed consent      | <a href="#">#32</a>  | Model consent form and other related documentation given        | 6      |
| 31 | materials             |                      | to participants and authorised surrogates                       |        |
| 32 |                       |                      |                                                                 |        |
| 33 |                       |                      |                                                                 |        |
| 34 | Biological specimens  | <a href="#">#33</a>  | Plans for collection, laboratory evaluation, and storage of     | N/A    |
| 35 |                       |                      | biological specimens for genetic or molecular analysis in       |        |
| 36 |                       |                      | the current trial and for future use in ancillary studies, if   |        |
| 37 |                       |                      | applicable                                                      |        |
| 38 |                       |                      |                                                                 |        |
| 39 |                       |                      |                                                                 |        |
| 40 |                       |                      |                                                                 |        |

41 The SPIRIT checklist is distributed under the terms of the Creative Commons Attribution License CC-  
 42 BY-ND 3.0. This checklist can be completed online using <https://www.goodreports.org/>, a tool made  
 43 by the [EQUATOR Network](#) in collaboration with [Penelope.ai](#)  
 44  
 45  
 46  
 47  
 48  
 49  
 50  
 51  
 52  
 53  
 54  
 55  
 56  
 57  
 58  
 59  
 60

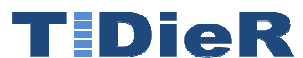

Template for Intervention  
Description and Replication

## The TIDieR (Template for Intervention Description and Replication) Checklist\*:

Information to include when describing an intervention and the location of the information

| Item number | Item                                                                                                                                                                                                                                                                                                 | Where located **                              |                   |
|-------------|------------------------------------------------------------------------------------------------------------------------------------------------------------------------------------------------------------------------------------------------------------------------------------------------------|-----------------------------------------------|-------------------|
|             |                                                                                                                                                                                                                                                                                                      | Primary paper<br>(page or appendix<br>number) | Other † (details) |
|             | <b>BRIEF NAME</b>                                                                                                                                                                                                                                                                                    |                                               |                   |
| 1.          | Provide the name or a phrase that describes the intervention.                                                                                                                                                                                                                                        | <u>Page 3-4</u>                               | _____             |
|             | <b>WHY</b>                                                                                                                                                                                                                                                                                           |                                               |                   |
| 2.          | Describe any rationale, theory, or goal of the elements essential to the intervention.                                                                                                                                                                                                               | <u>Page 3-5</u>                               | _____             |
|             | <b>WHAT</b>                                                                                                                                                                                                                                                                                          |                                               |                   |
| 3.          | Materials: Describe any physical or informational materials used in the intervention, including those provided to participants or used in intervention delivery or in training of intervention providers.<br>Provide information on where the materials can be accessed (e.g. online appendix, URL). | <u>Page 10-11</u>                             | _____             |
| 4.          | Procedures: Describe each of the procedures, activities, and/or processes used in the intervention, including any enabling or support activities.                                                                                                                                                    | <u>Page 9-11</u>                              | _____             |
|             | <b>WHO PROVIDED</b>                                                                                                                                                                                                                                                                                  |                                               |                   |
| 5.          | For each category of intervention provider (e.g. psychologist, nursing assistant), describe their expertise, background and any specific training given.                                                                                                                                             | <u>Page 11</u>                                | _____             |
|             | <b>HOW</b>                                                                                                                                                                                                                                                                                           |                                               |                   |
| 6.          | Describe the modes of delivery (e.g. face-to-face or by some other mechanism, such as internet or telephone) of the intervention and whether it was provided individually or in a group.                                                                                                             | <u>Page 9-10</u>                              | _____             |
|             | <b>WHERE</b>                                                                                                                                                                                                                                                                                         |                                               |                   |
| 7.          | Describe the type(s) of location(s) where the intervention occurred, including any necessary infrastructure or relevant features.                                                                                                                                                                    | <u>Page 9-10</u>                              | _____             |

TIDieR checklist



|                          |                                                                                                                                                                                   |                   |
|--------------------------|-----------------------------------------------------------------------------------------------------------------------------------------------------------------------------------|-------------------|
| <b>WHEN and HOW MUCH</b> |                                                                                                                                                                                   |                   |
| 8.                       | Describe the number of times the intervention was delivered and over what period of time including the number of sessions, their schedule, and their duration, intensity or dose. | <u>Page 9 -11</u> |
| <b>TAILORING</b>         |                                                                                                                                                                                   |                   |
| 9.                       | If the intervention was planned to be personalised, titrated or adapted, then describe what, why, when, and how.                                                                  | <u>Page 9-11</u>  |
| <b>MODIFICATIONS</b>     |                                                                                                                                                                                   |                   |
| 10.†                     | If the intervention was modified during the course of the study, describe the changes (what, why, when, and how).                                                                 | <u>N/A</u>        |
| <b>HOW WELL</b>          |                                                                                                                                                                                   |                   |
| 11.                      | Planned: If intervention adherence or fidelity was assessed, describe how and by whom, and if any strategies were used to maintain or improve fidelity, describe them.            | <u>N/A</u>        |
| 12.‡                     | Actual: If intervention adherence or fidelity was assessed, describe the extent to which the intervention was delivered as planned.                                               | <u>N/A</u>        |

\*\* **Authors** - use N/A if an item is not applicable for the intervention being described. **Reviewers** – use ‘?’ if information about the element is not reported/not sufficiently reported.

† If the information is not provided in the primary paper, give details of where this information is available. This may include locations such as a published protocol or other published papers (provide citation details) or a website (provide the URL).

‡ If completing the TIDieR checklist for a protocol, these items are not relevant to the protocol and cannot be described until the study is complete.

\* We strongly recommend using this checklist in conjunction with the TIDieR guide (see *BMJ* 2014;348:g1687) which contains an explanation and elaboration for each item.

\* The focus of TIDieR is on reporting details of the intervention elements (and where relevant, comparison elements) of a study. Other elements and methodological features of studies are covered by other reporting statements and checklists and have not been duplicated as part of the TIDieR checklist. When a **randomised trial** is being reported, the TIDieR checklist should be used in conjunction with the CONSORT statement (see [www.consort-statement.org](http://www.consort-statement.org)) as an extension of **Item 5 of the CONSORT 2010 Statement**. When a **clinical trial protocol** is being reported, the TIDieR checklist should be used in conjunction with the SPIRIT statement as an extension of **Item 11 of the SPIRIT 2013 Statement** (see [www.spirit-statement.org](http://www.spirit-statement.org)). For alternate study designs, TIDieR can be used in conjunction with the appropriate checklist for that study design (see [www.equator-network.org](http://www.equator-network.org)).

TIDieR checklist
